# Supplementary material
Source: PubMed Central journal article supplement (PMC2827956)
Supplement: JCI40645sd.pdf [file JCI40645sd.pdf]

Figure S1, panels A.1-A.8

**A.1** ( $\alpha$ CCL1)

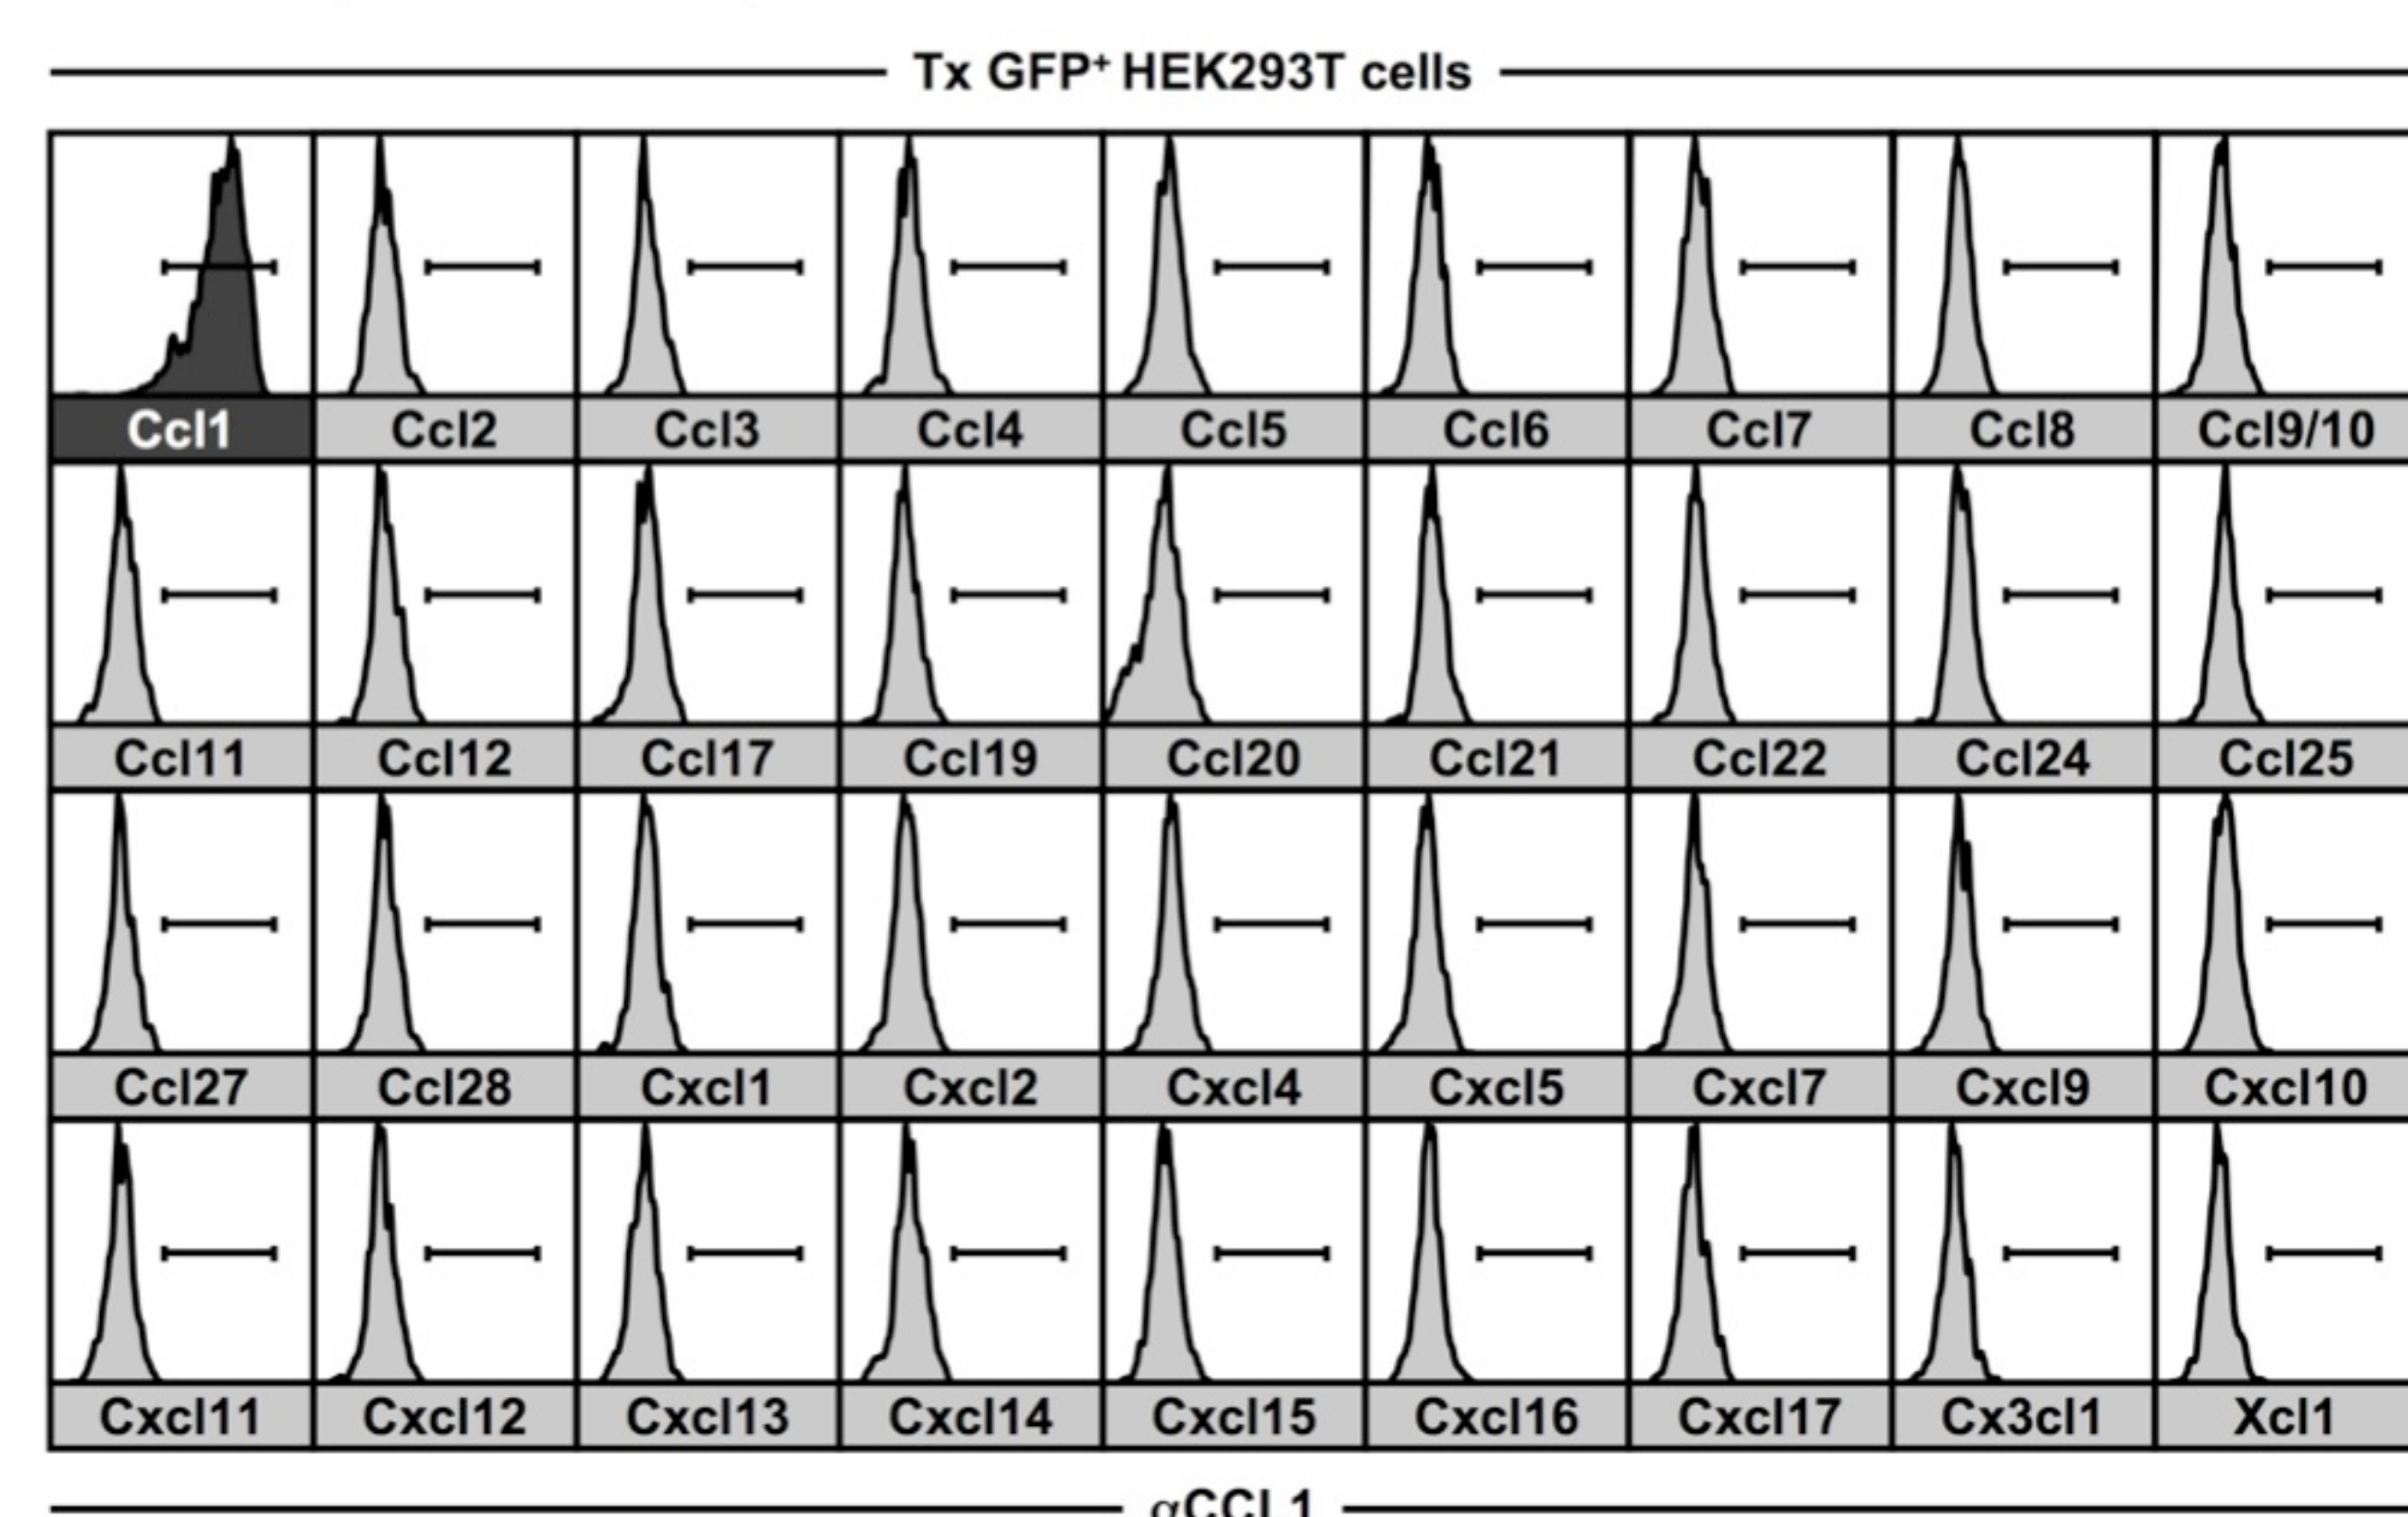

**A.2** ( $\alpha$ CCL2)

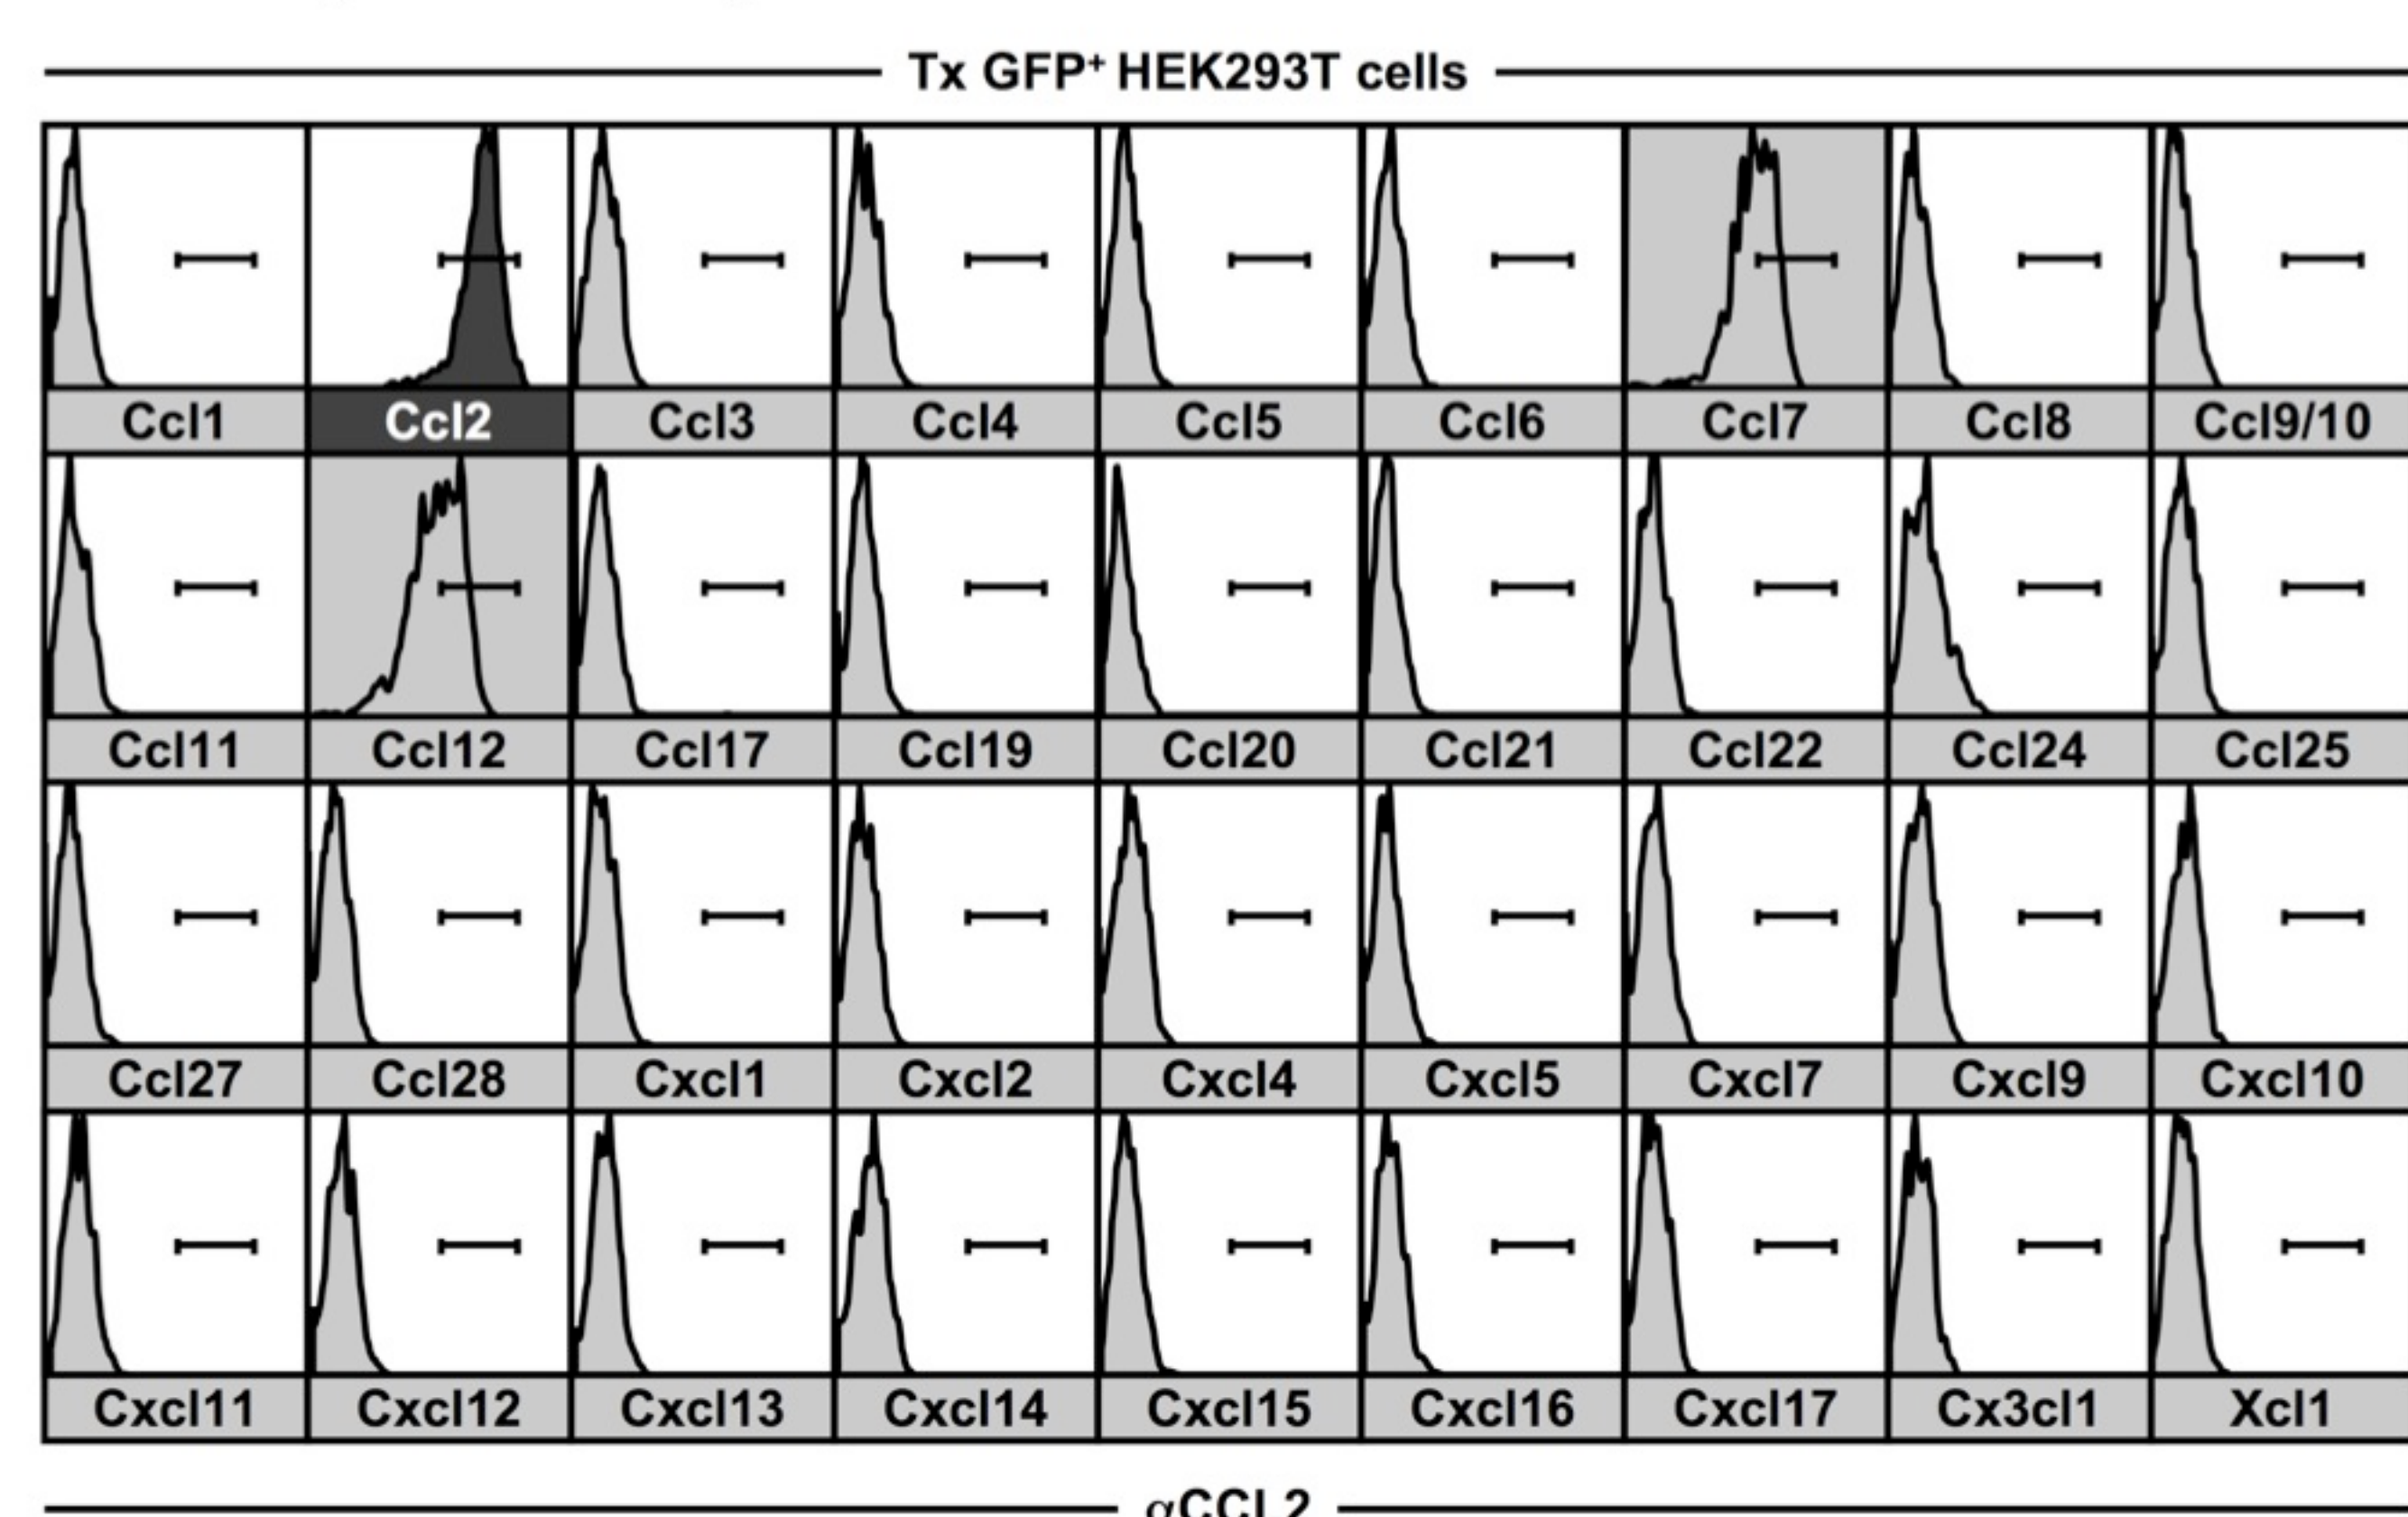

**A.3** ( $\alpha$ CCL3)

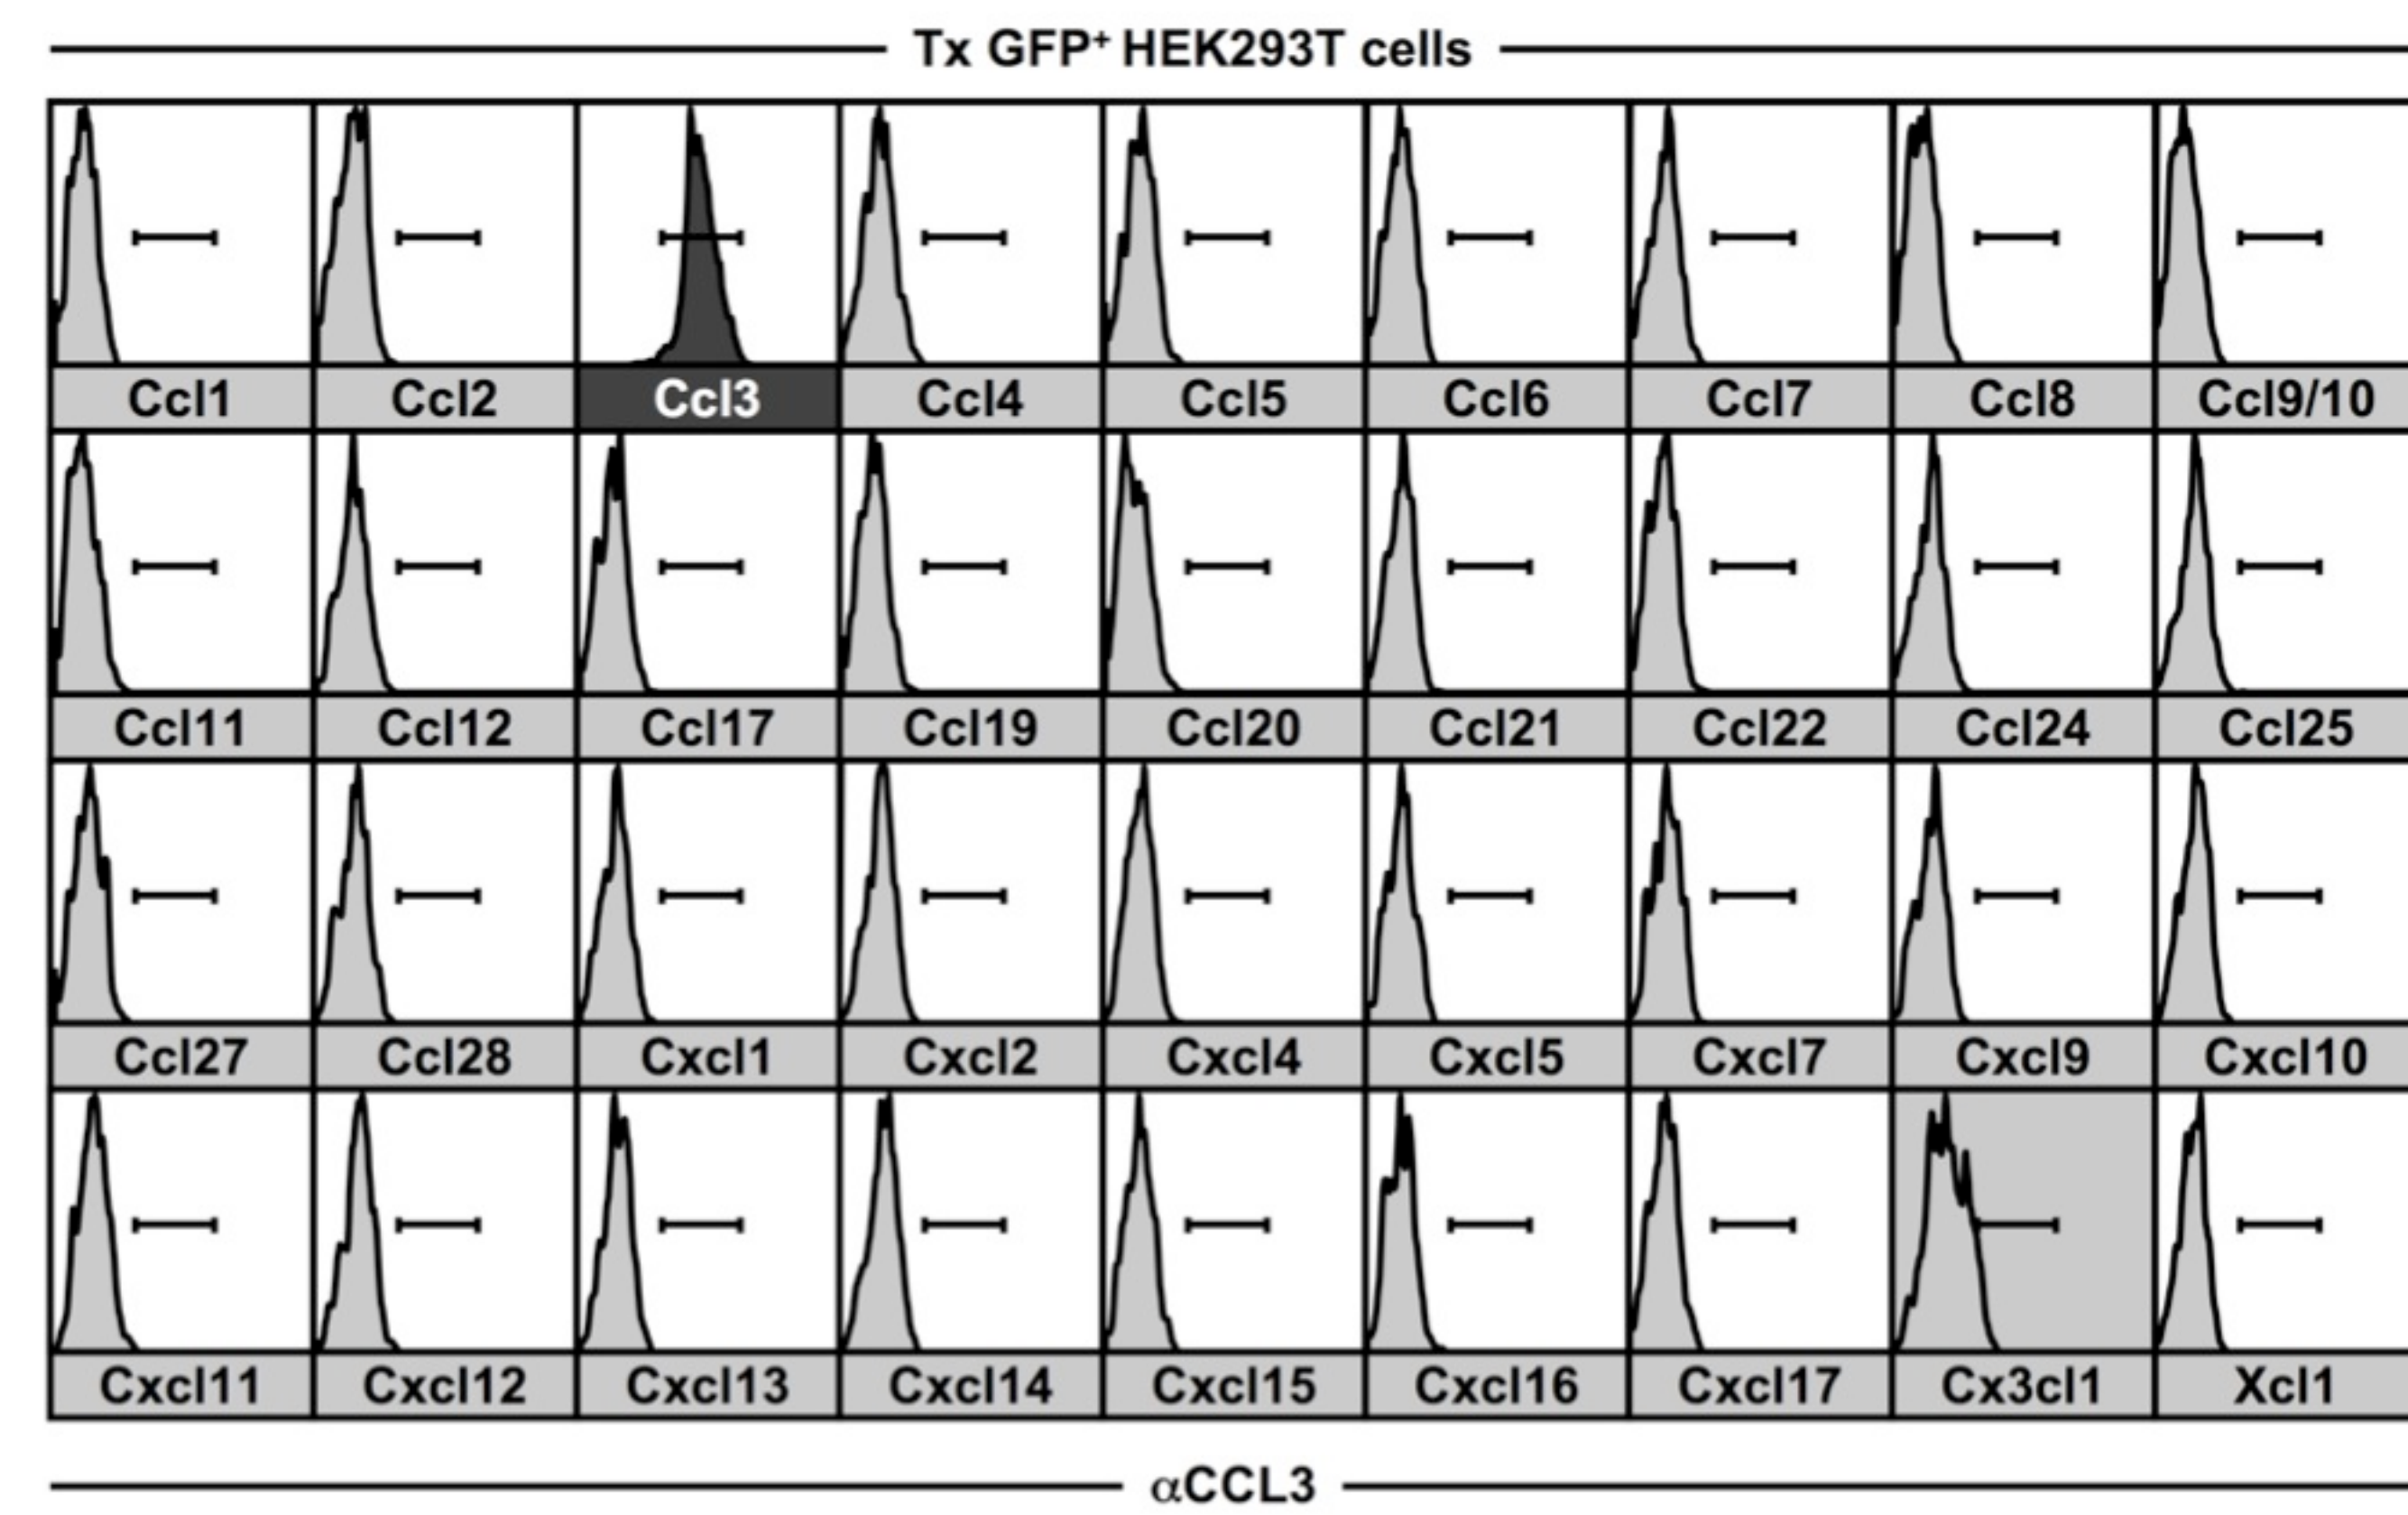

**A.4** ( $\alpha$ CCL4)

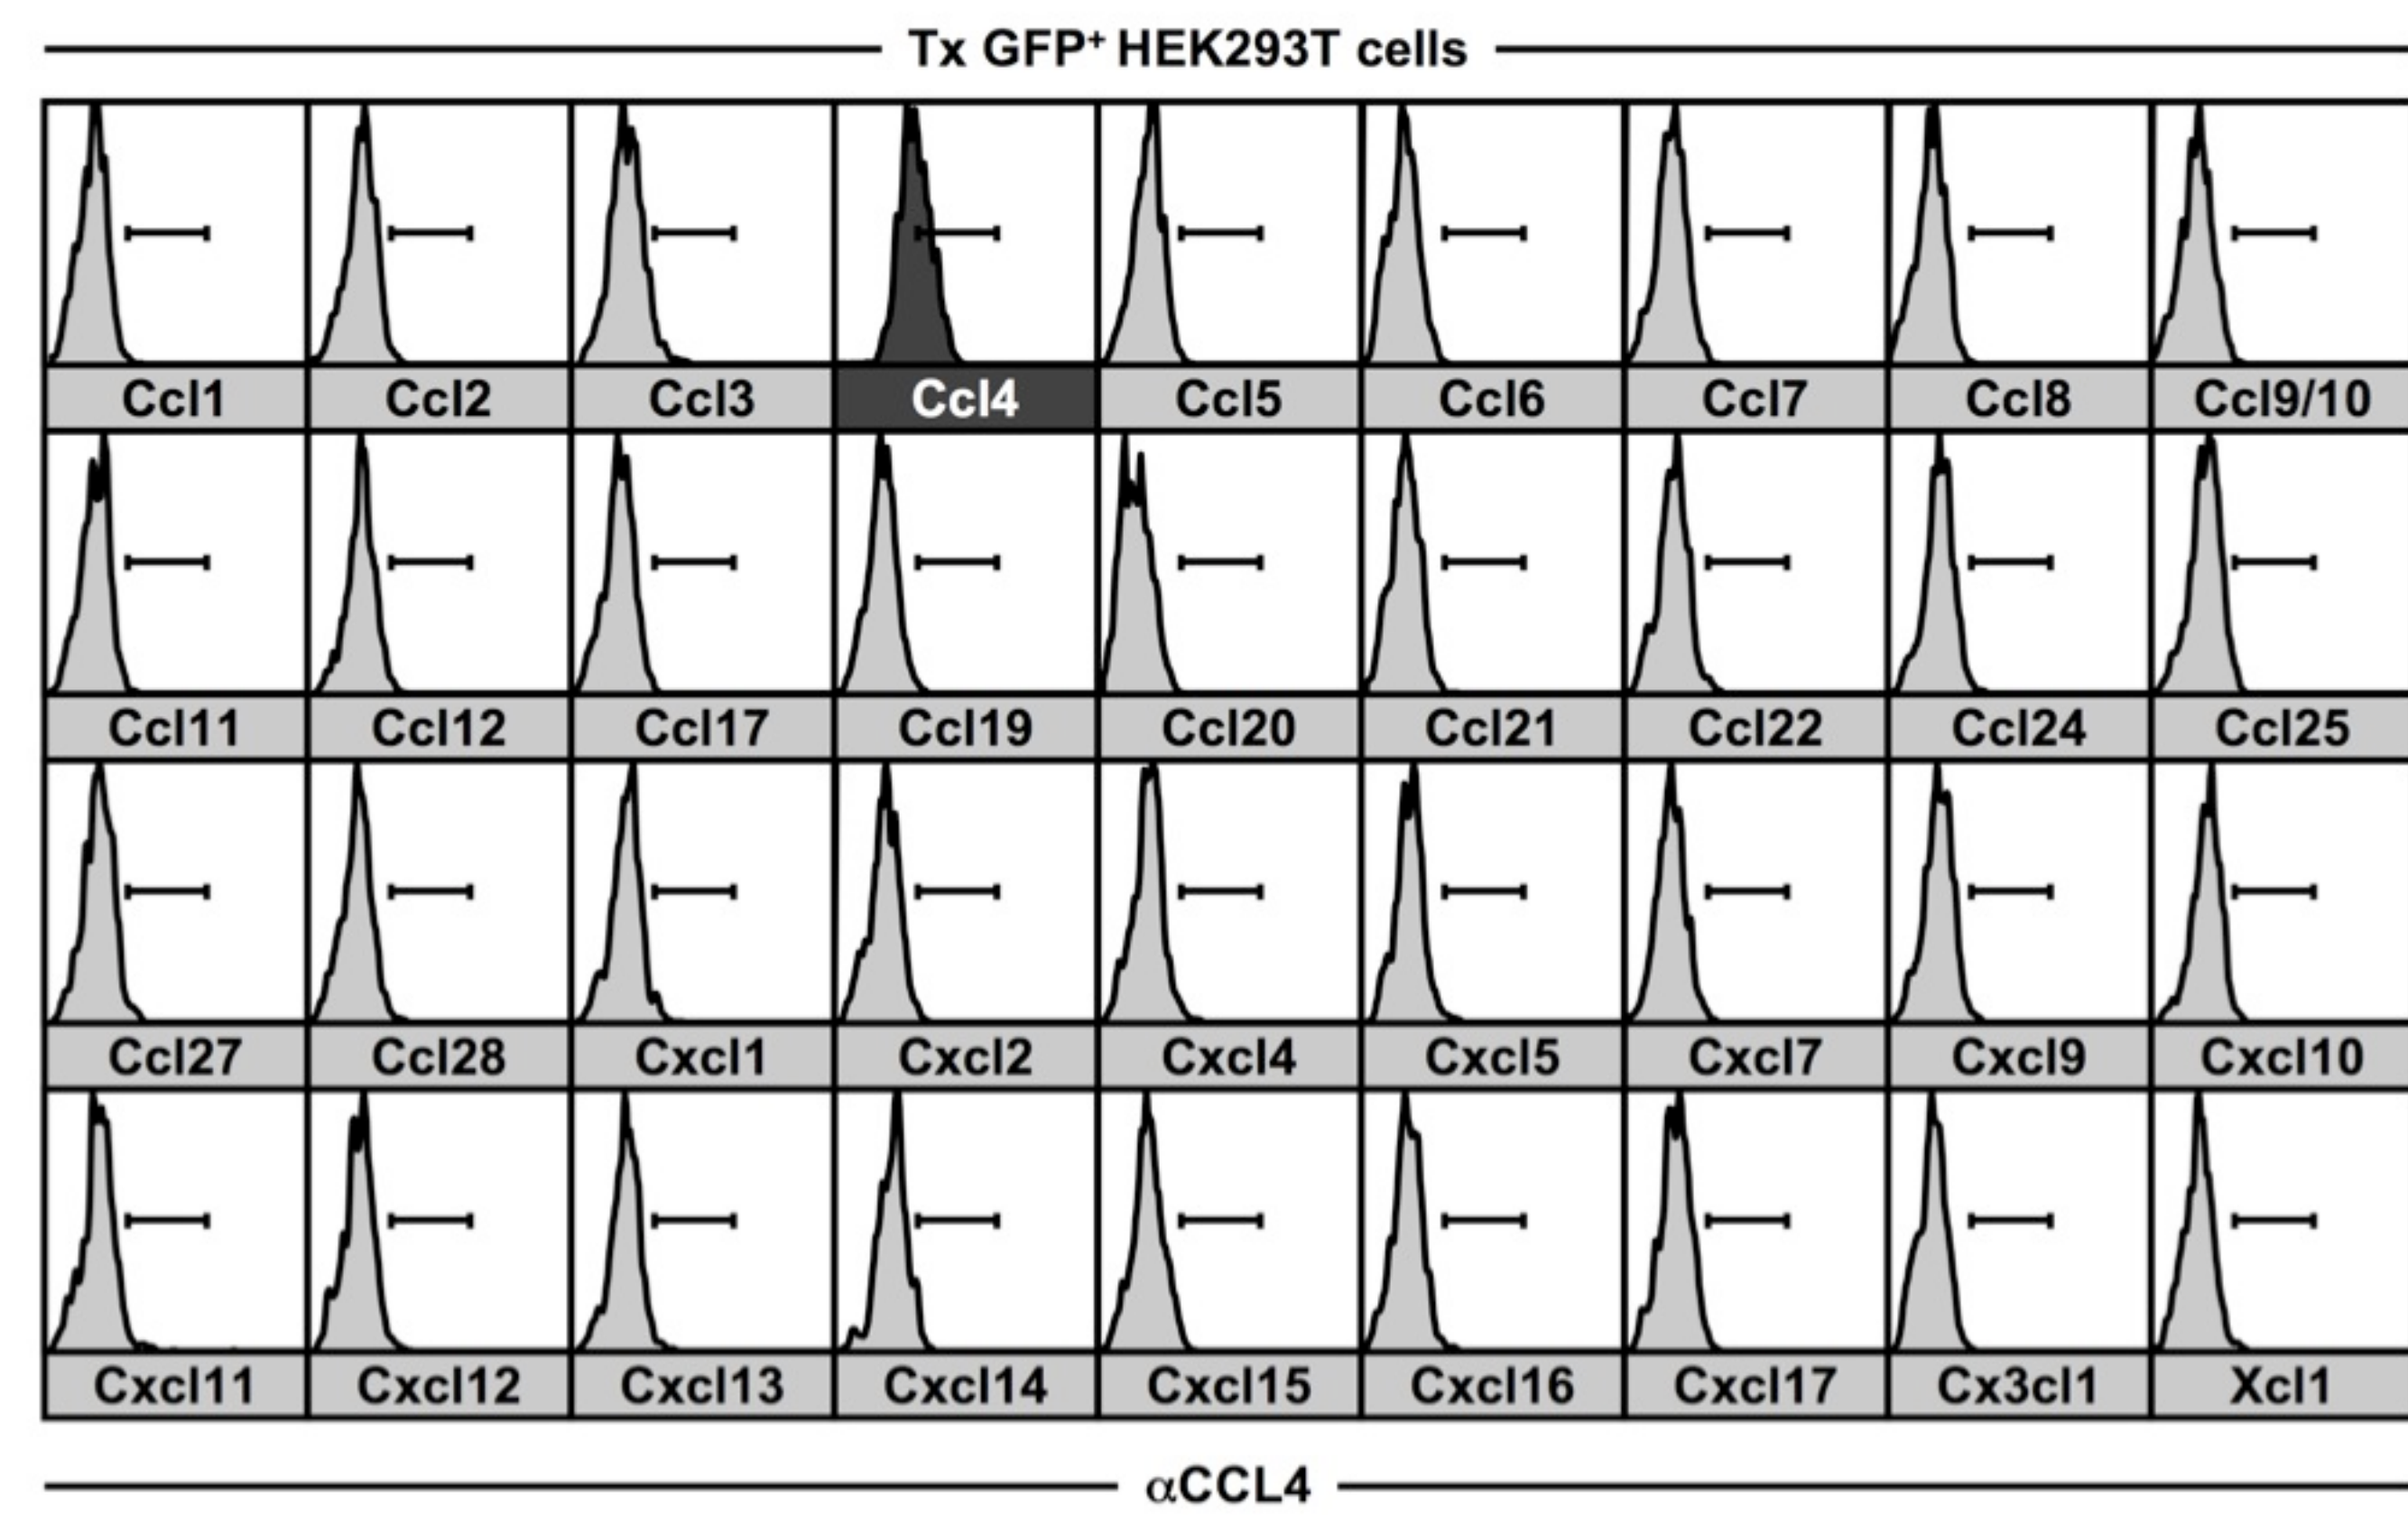

**A.5** ( $\alpha$ CCL5)

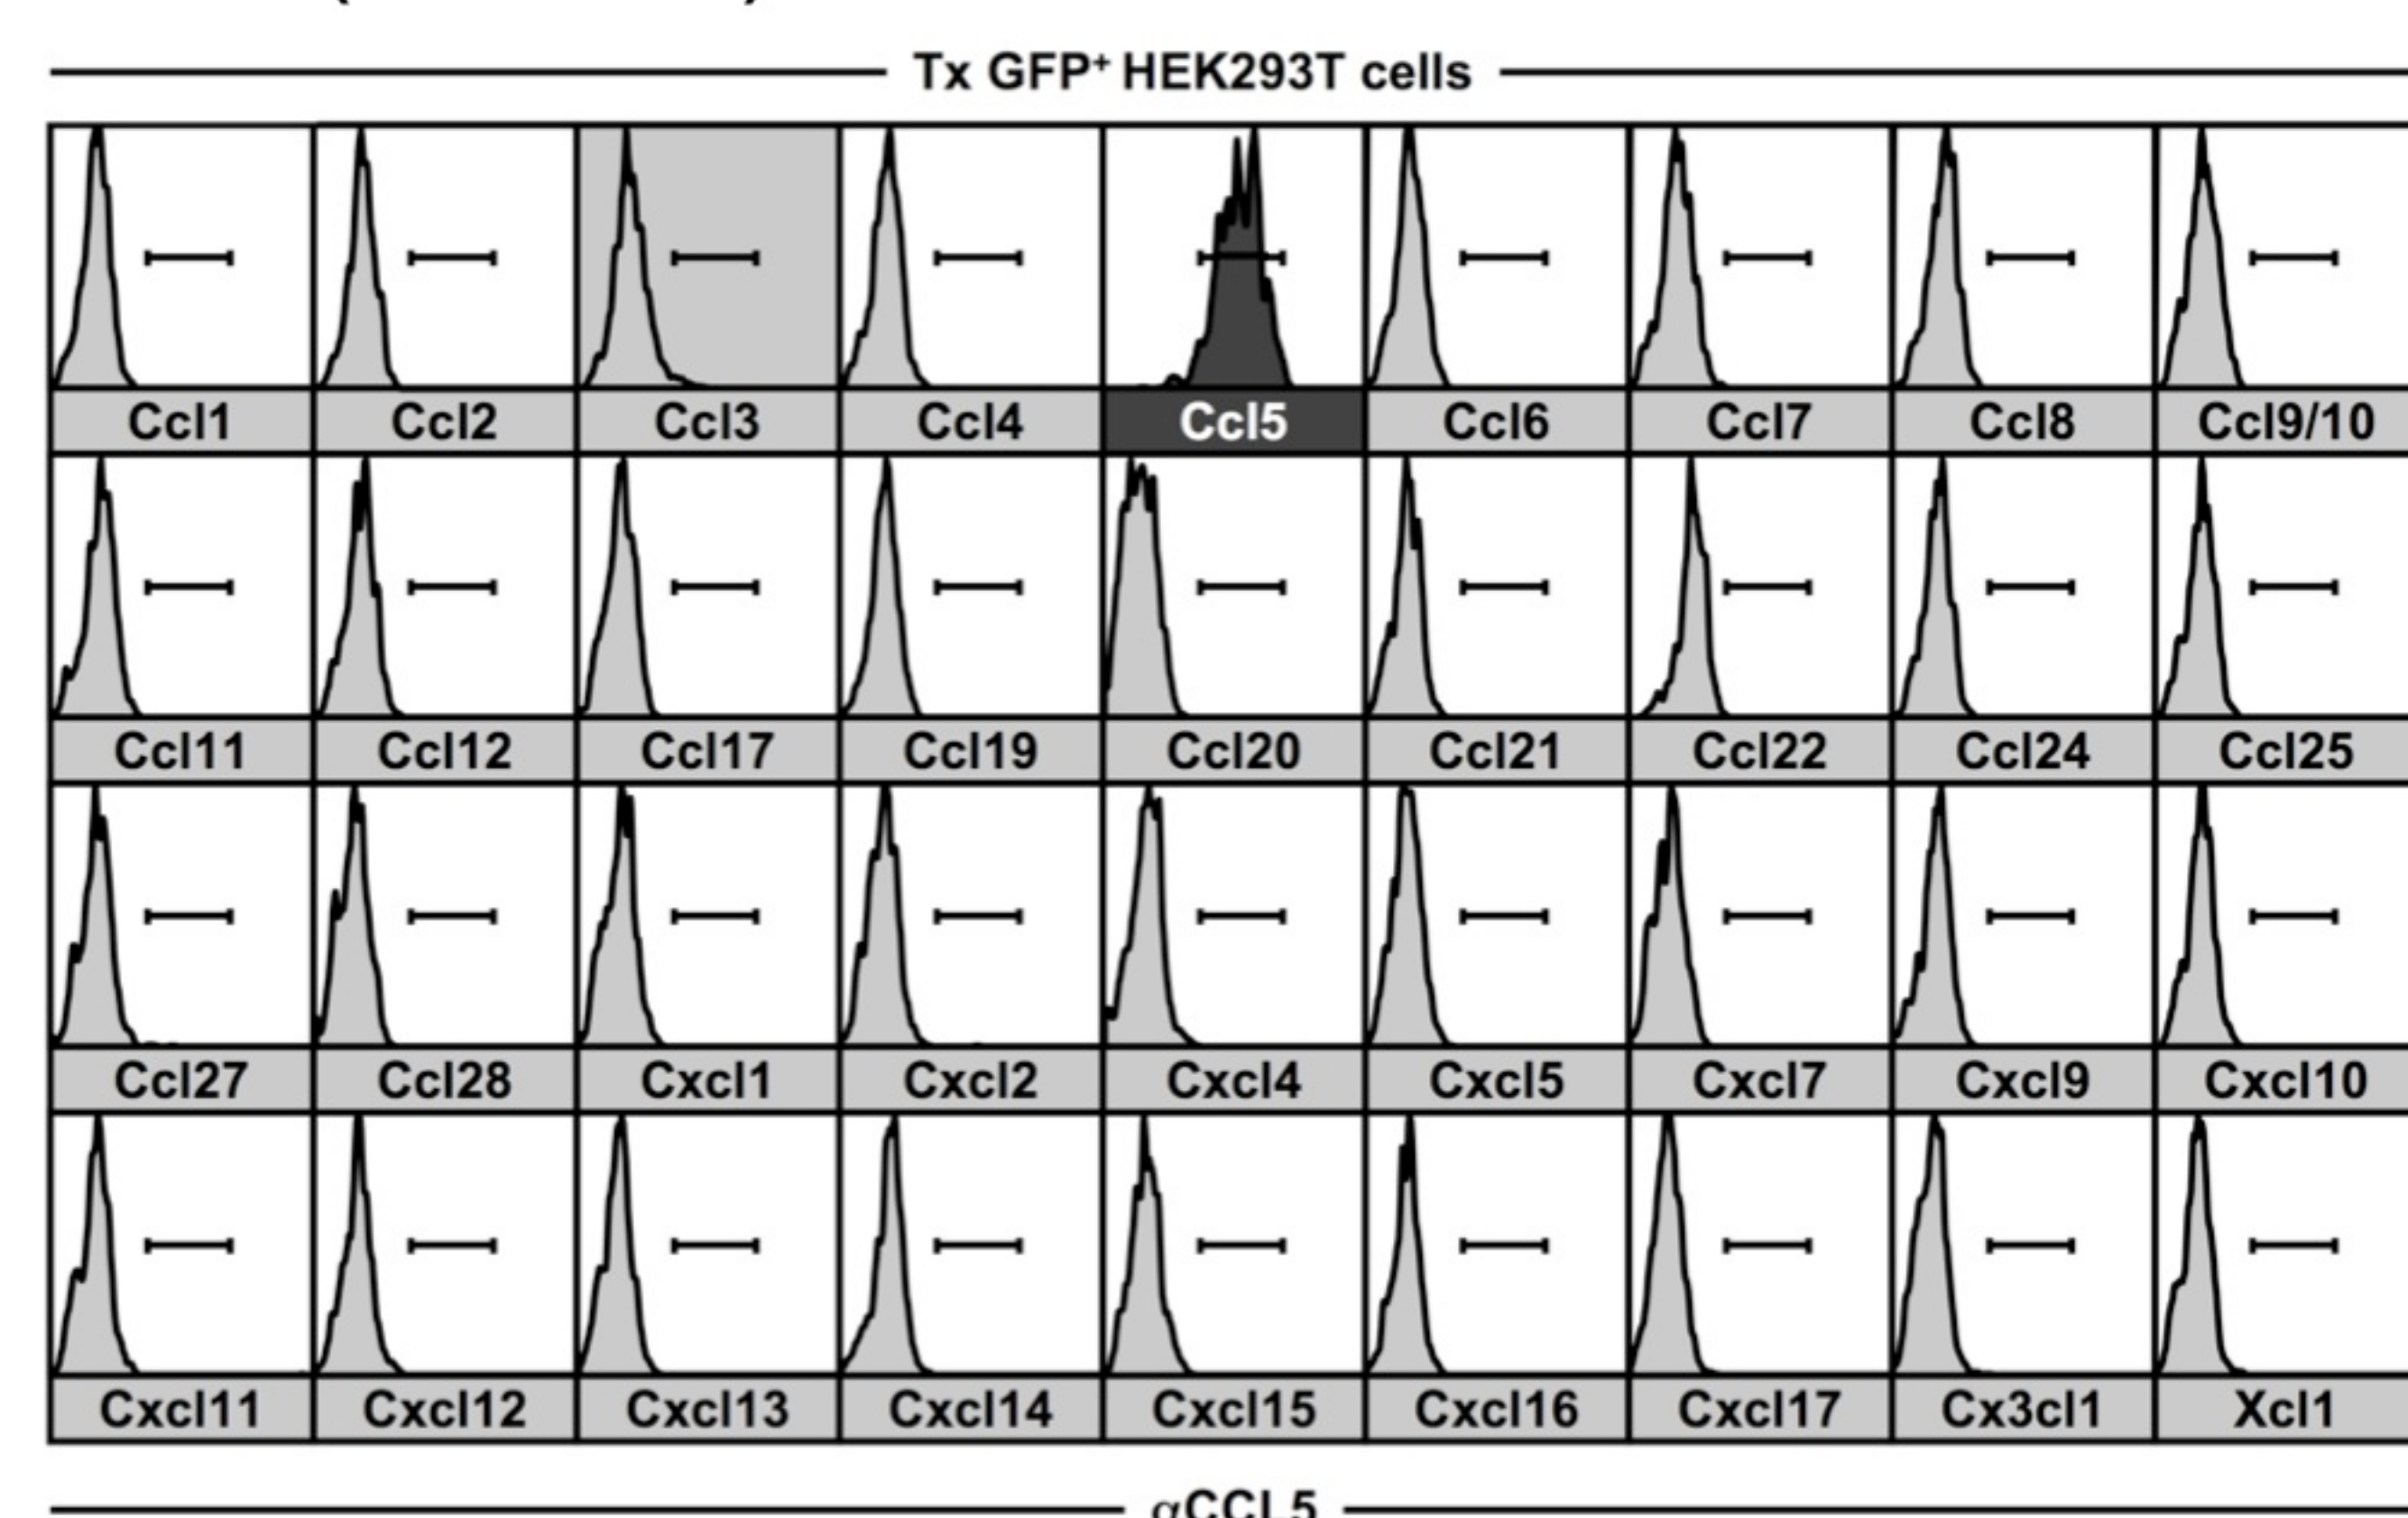

**A.6** ( $\alpha$ CCL6)

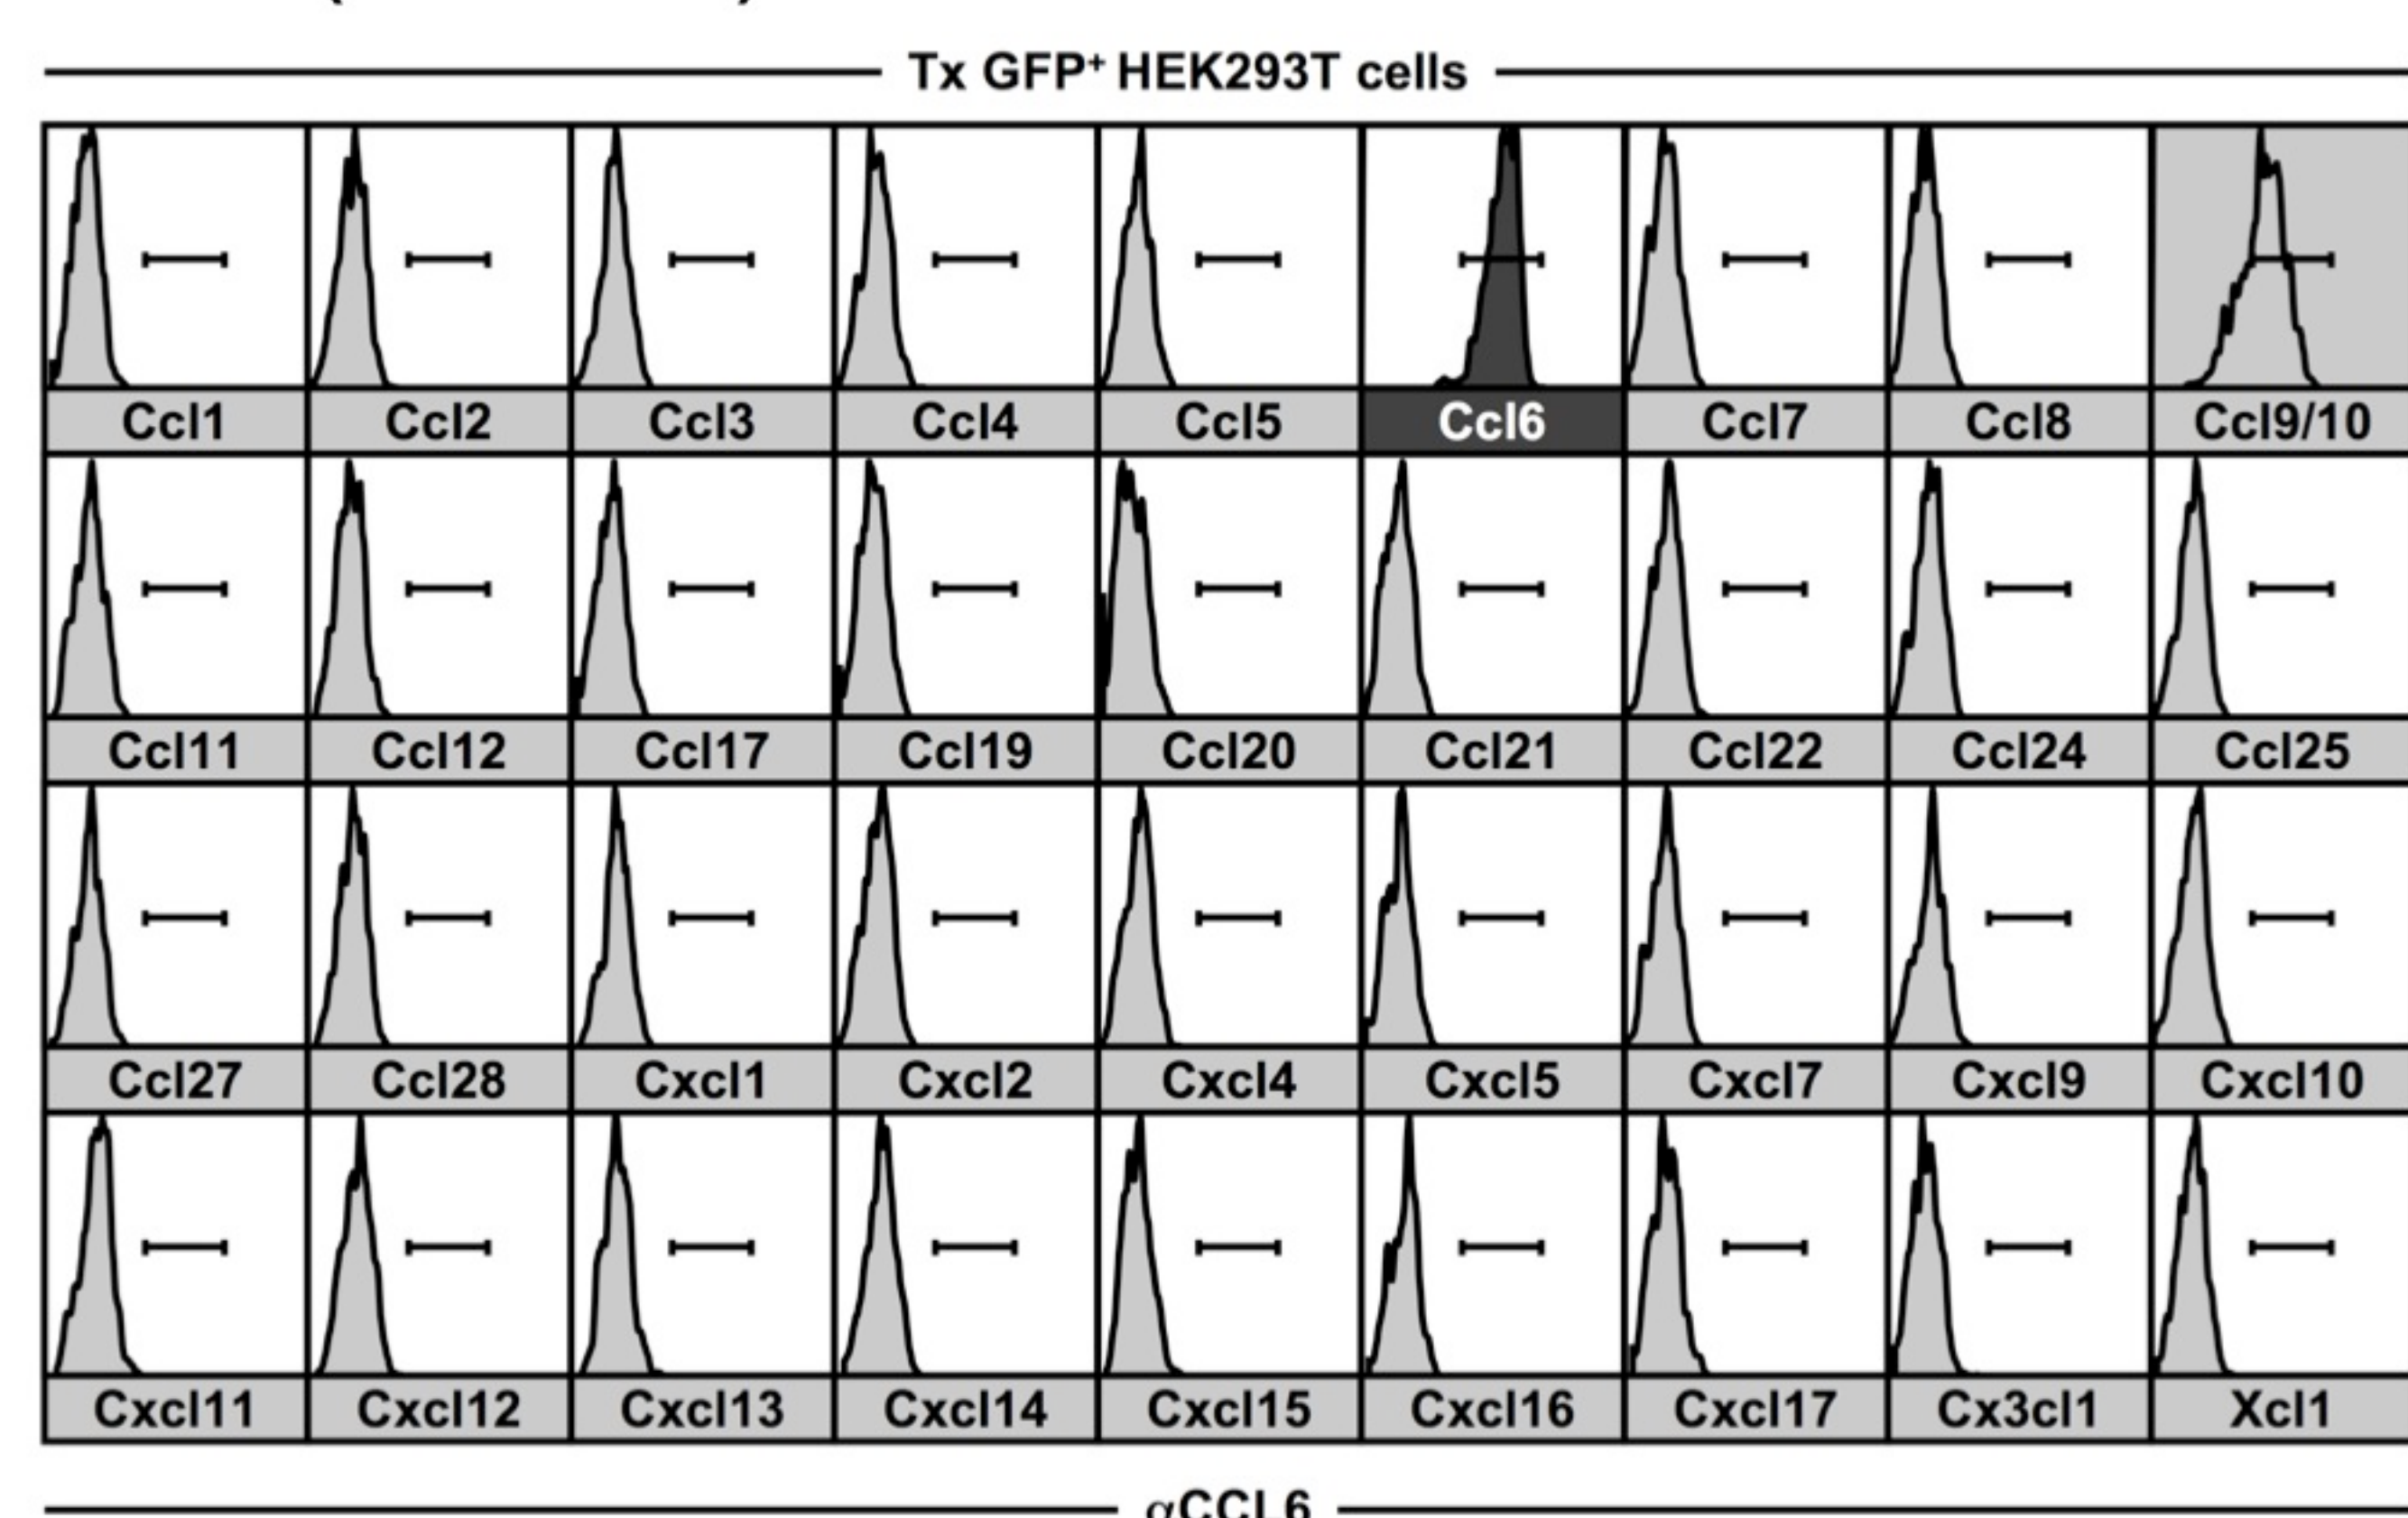

**A.7** ( $\alpha$ CCL7)

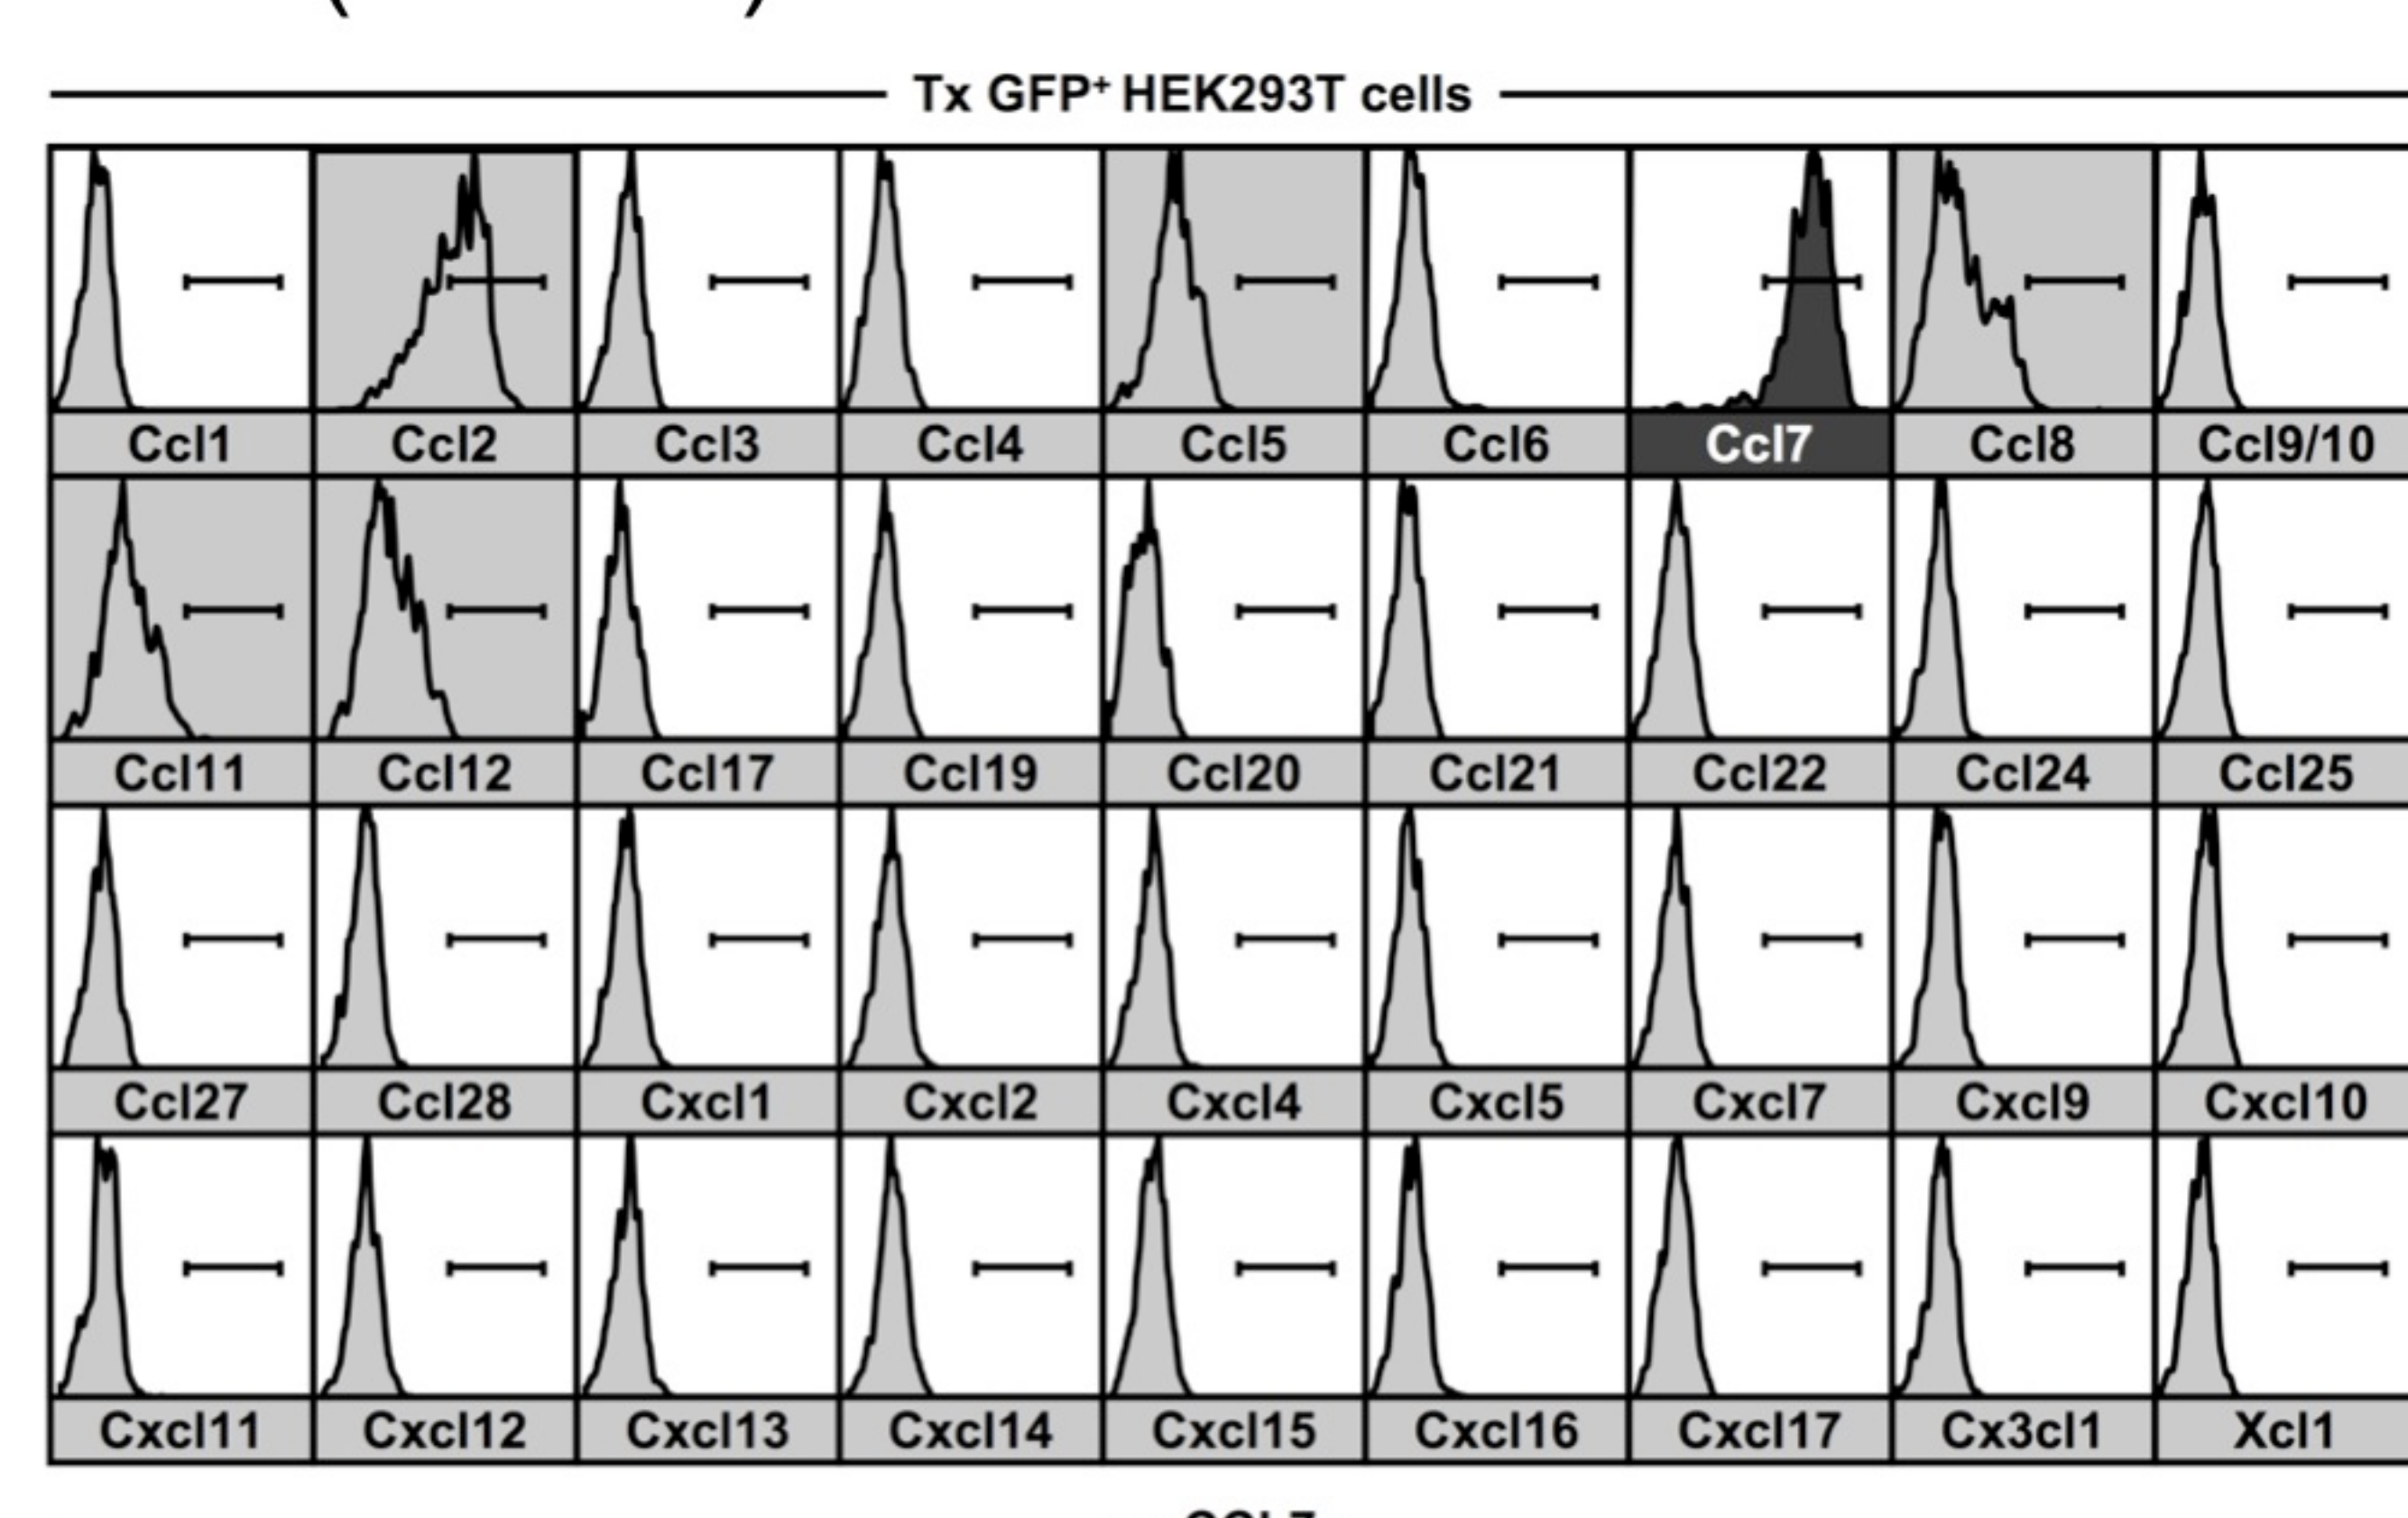

**A.8** ( $\alpha$ CCL8)

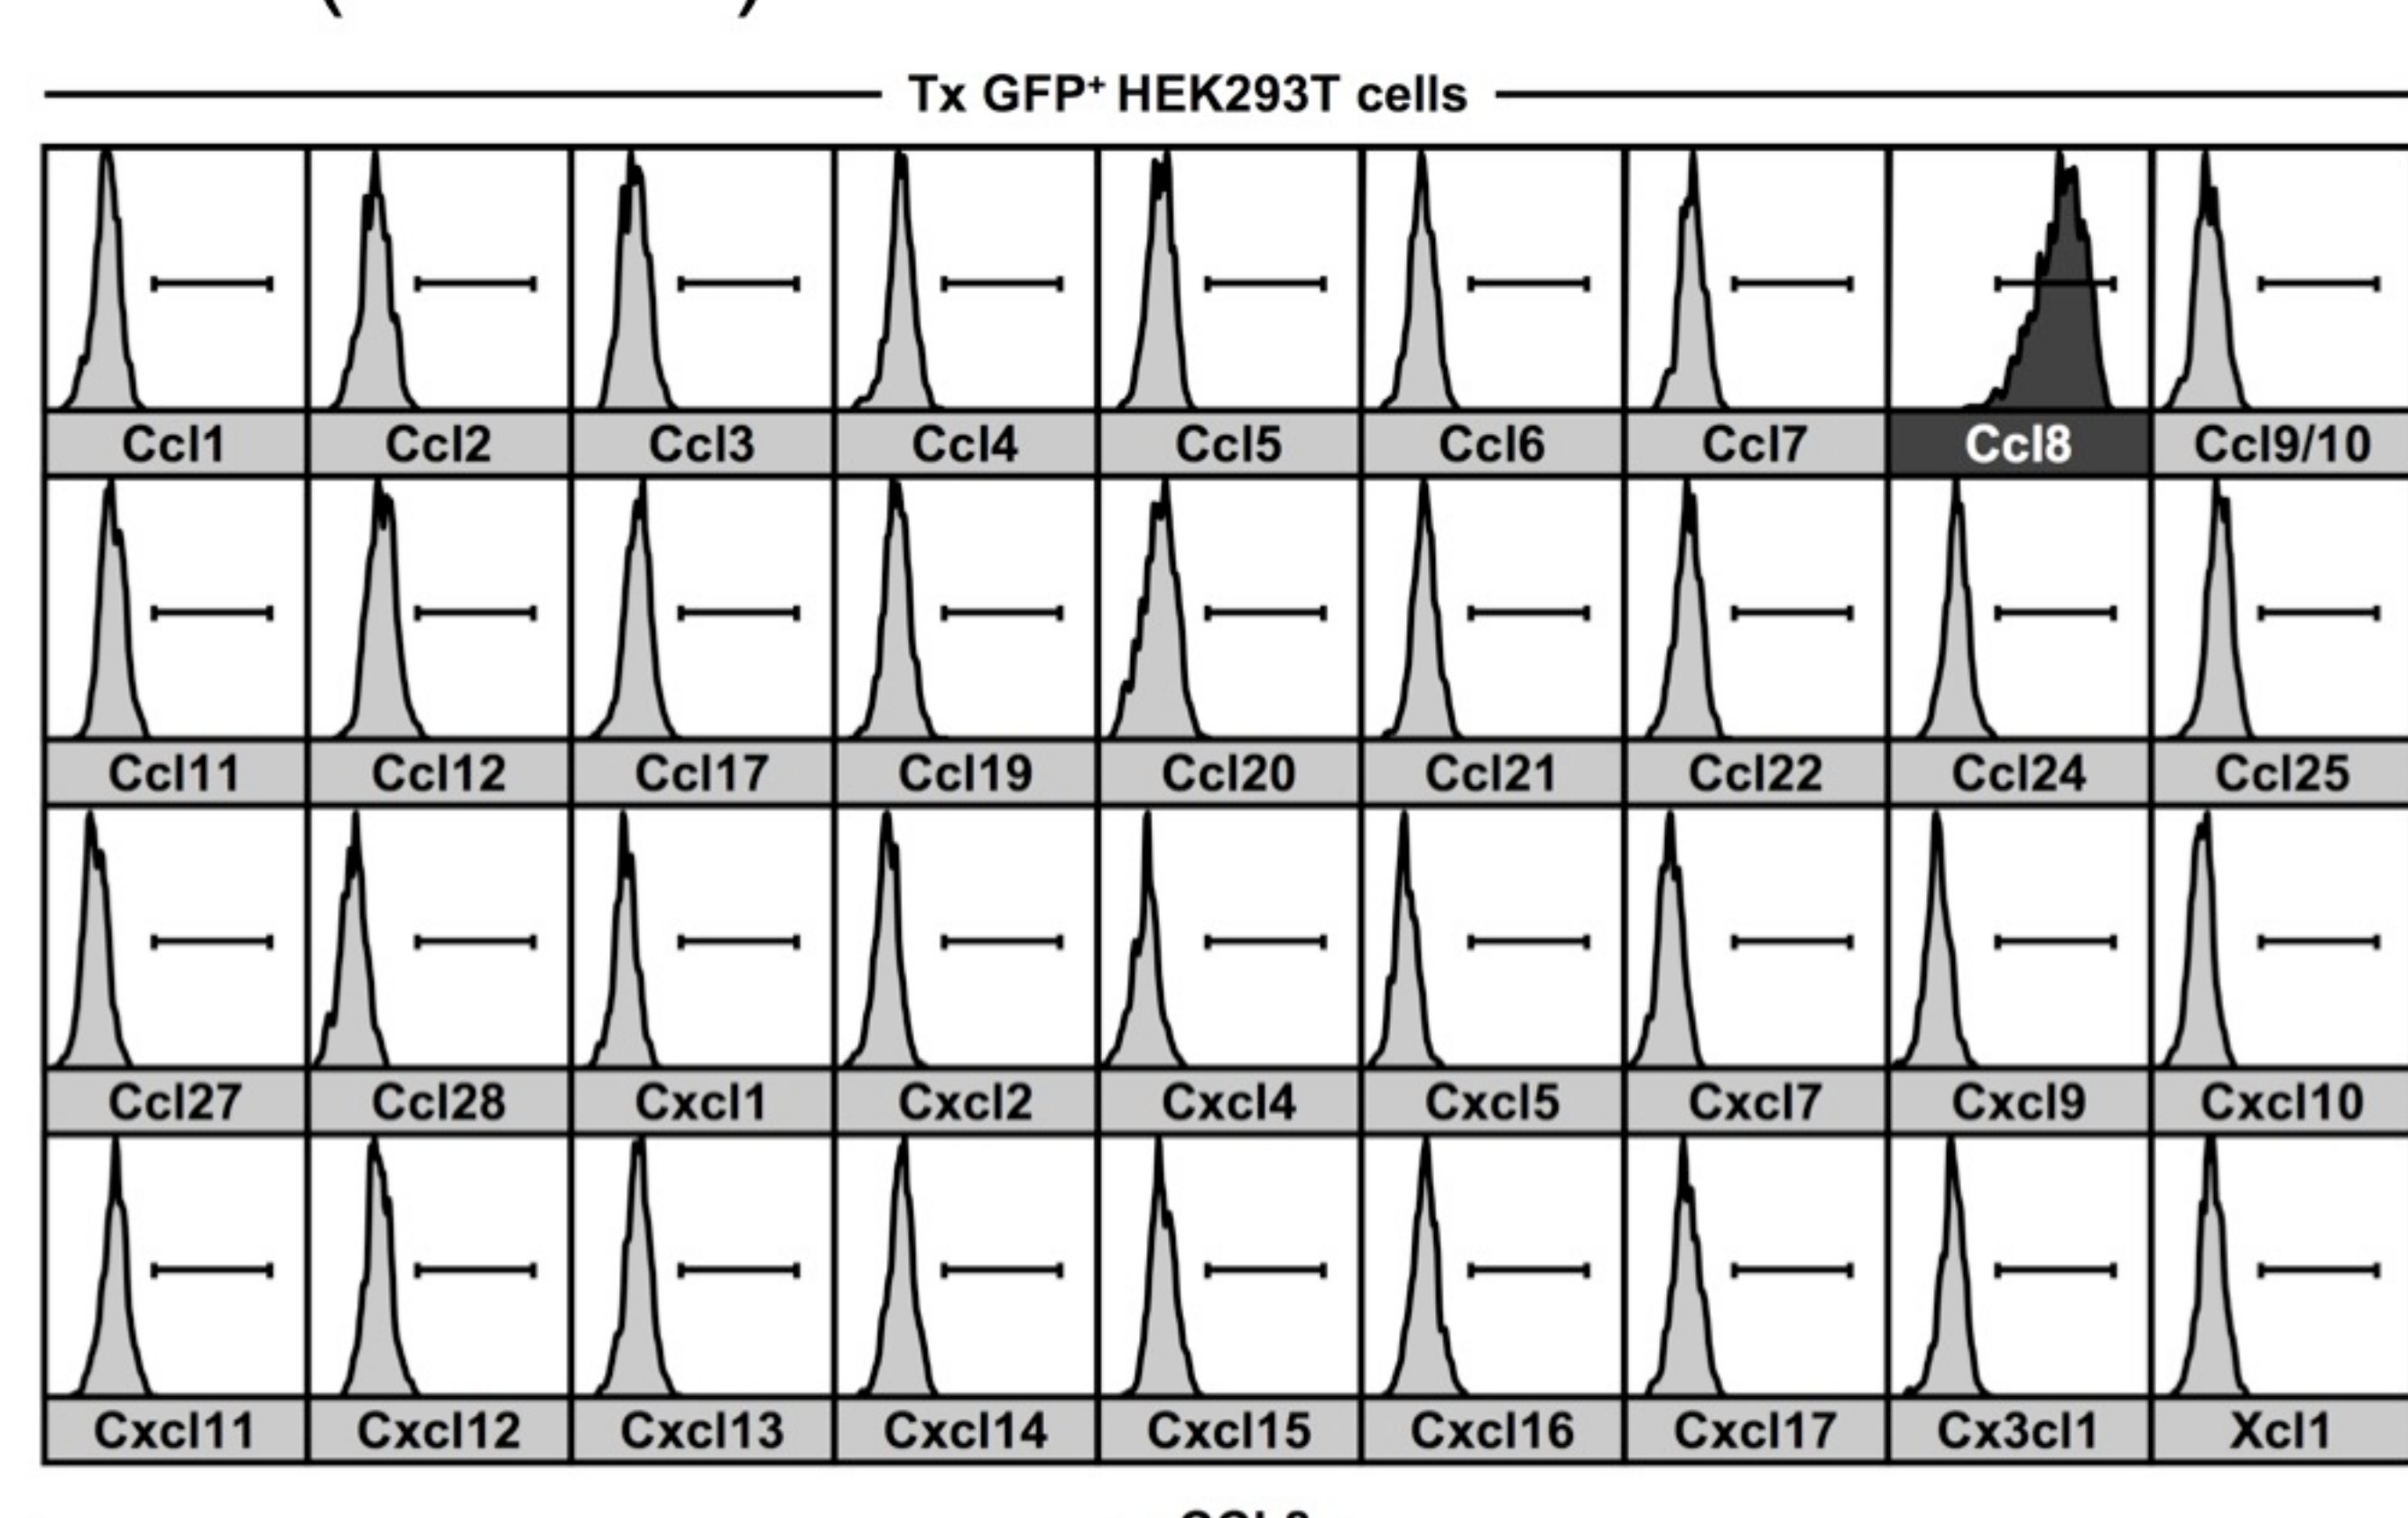

Figure S1, panels B.1-B.8

**B.1** ( $\alpha$ CCL9/10)

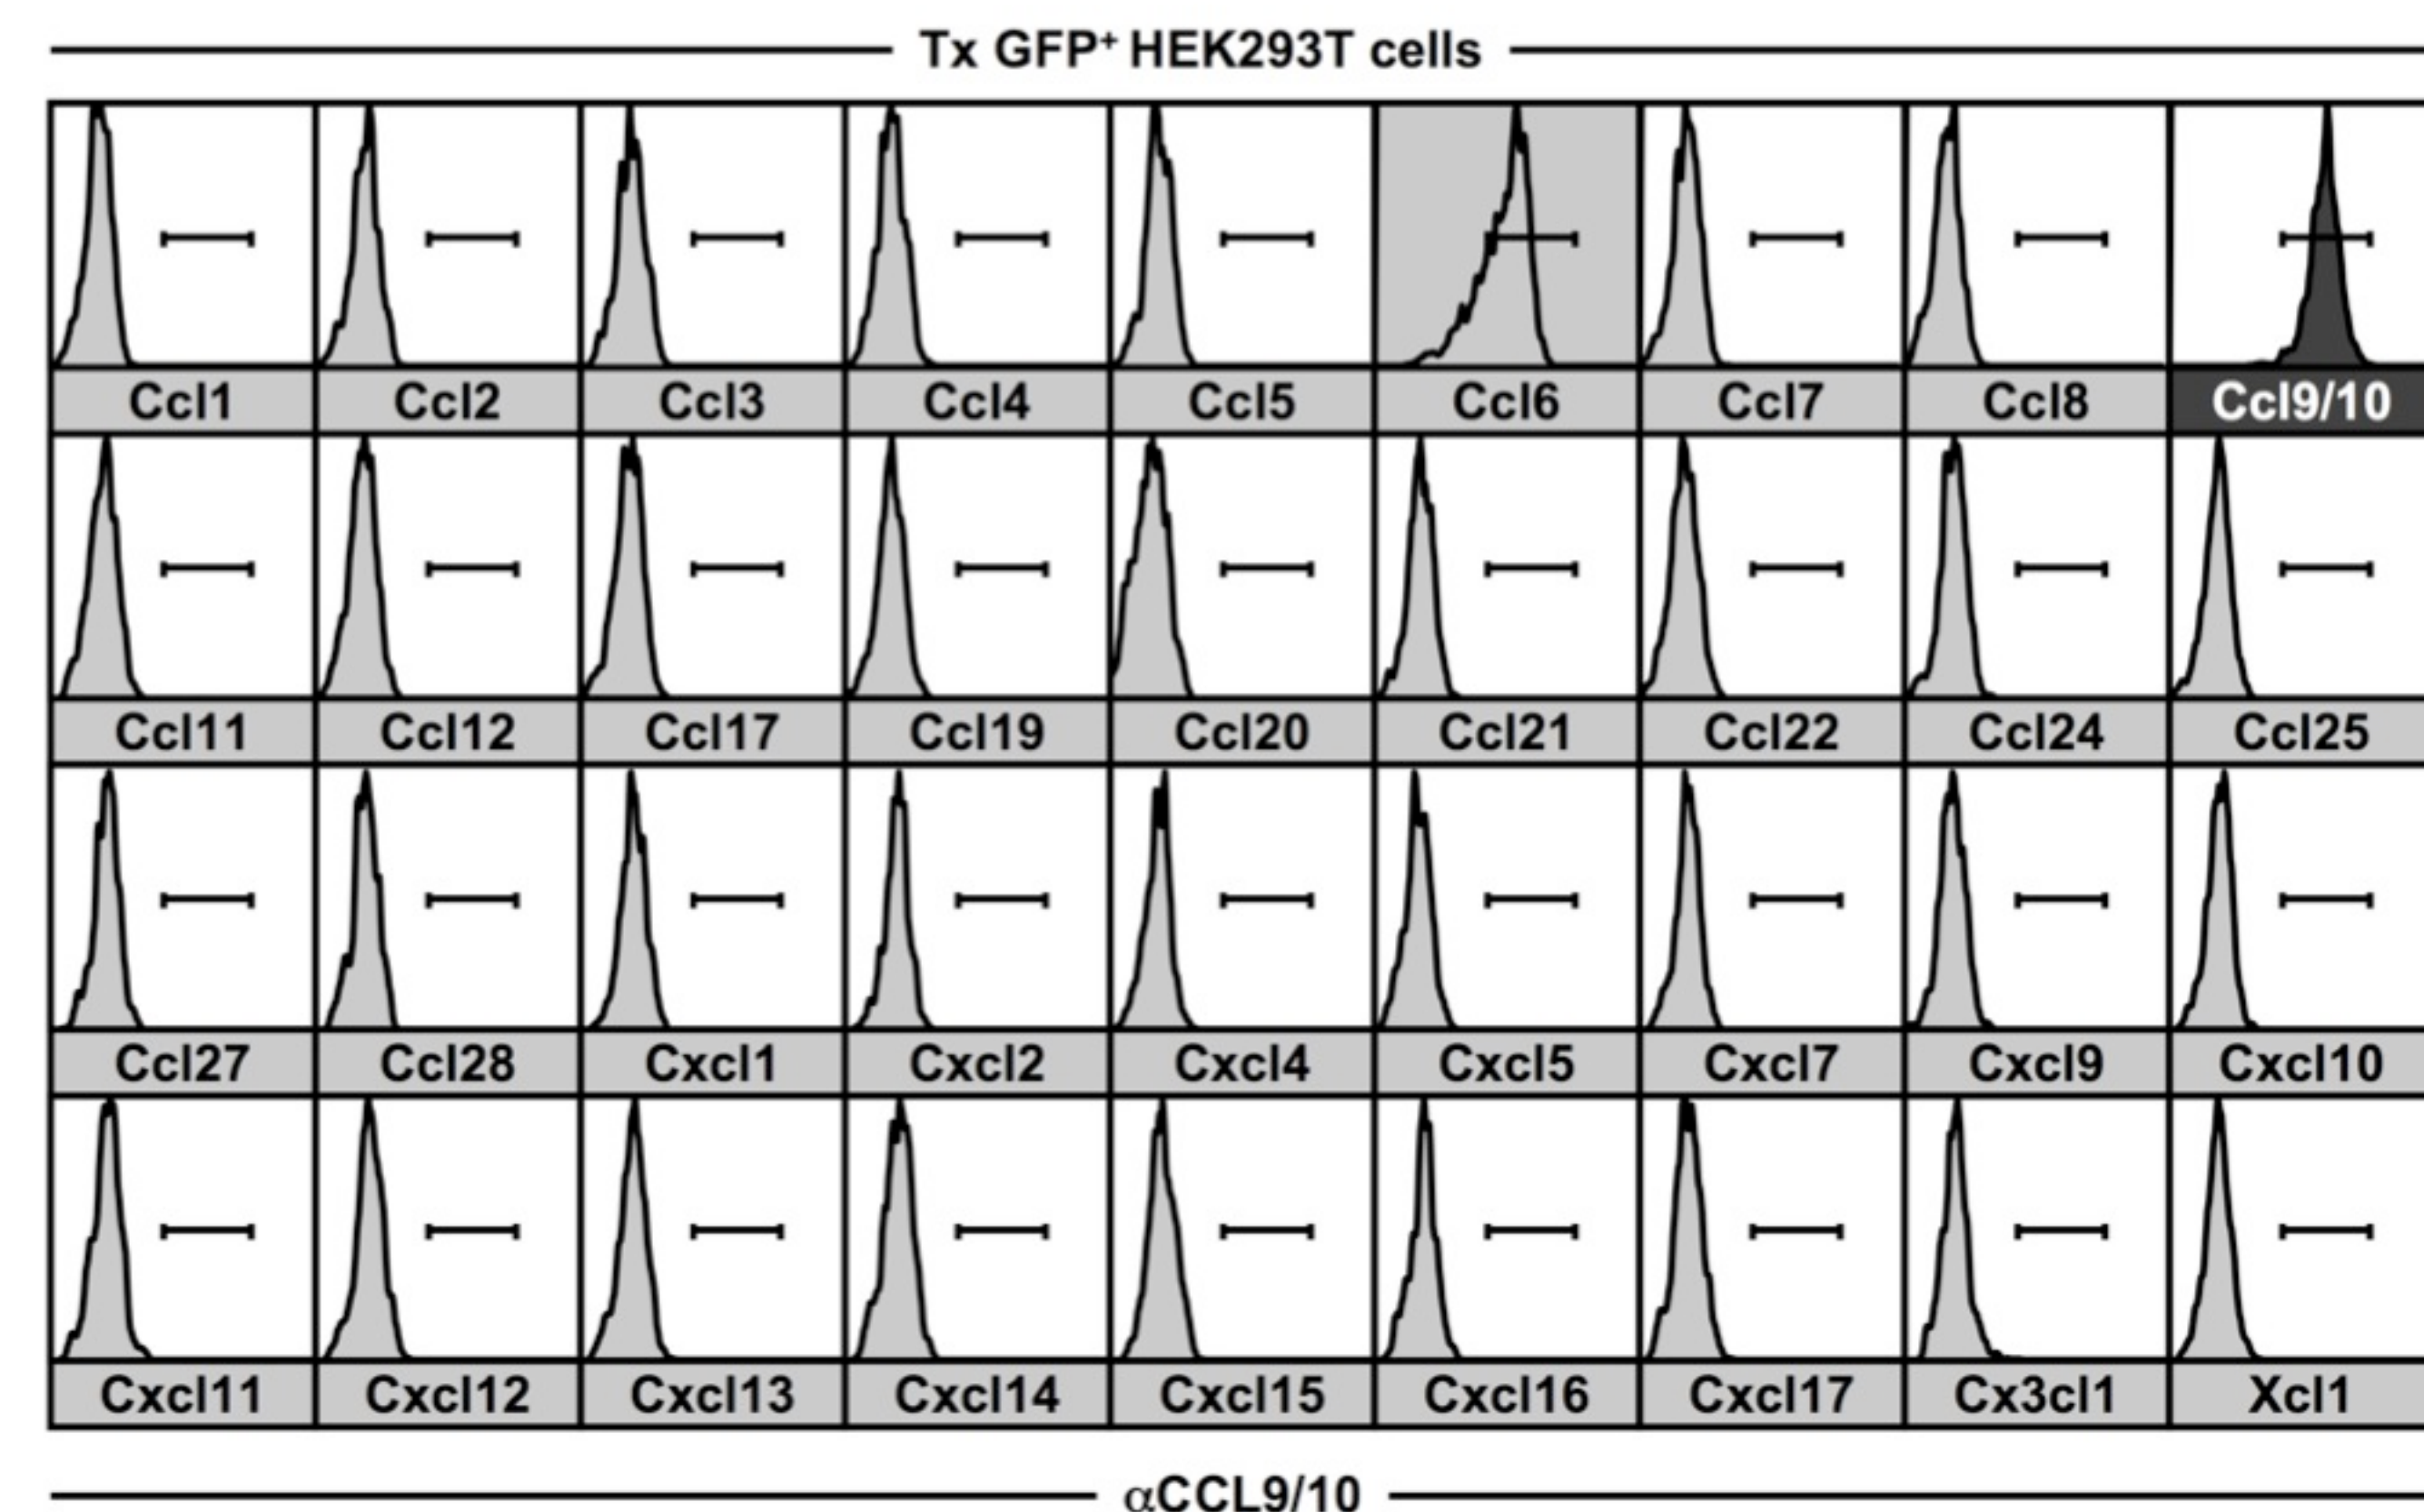

**B.2** ( $\alpha$ CCL11)

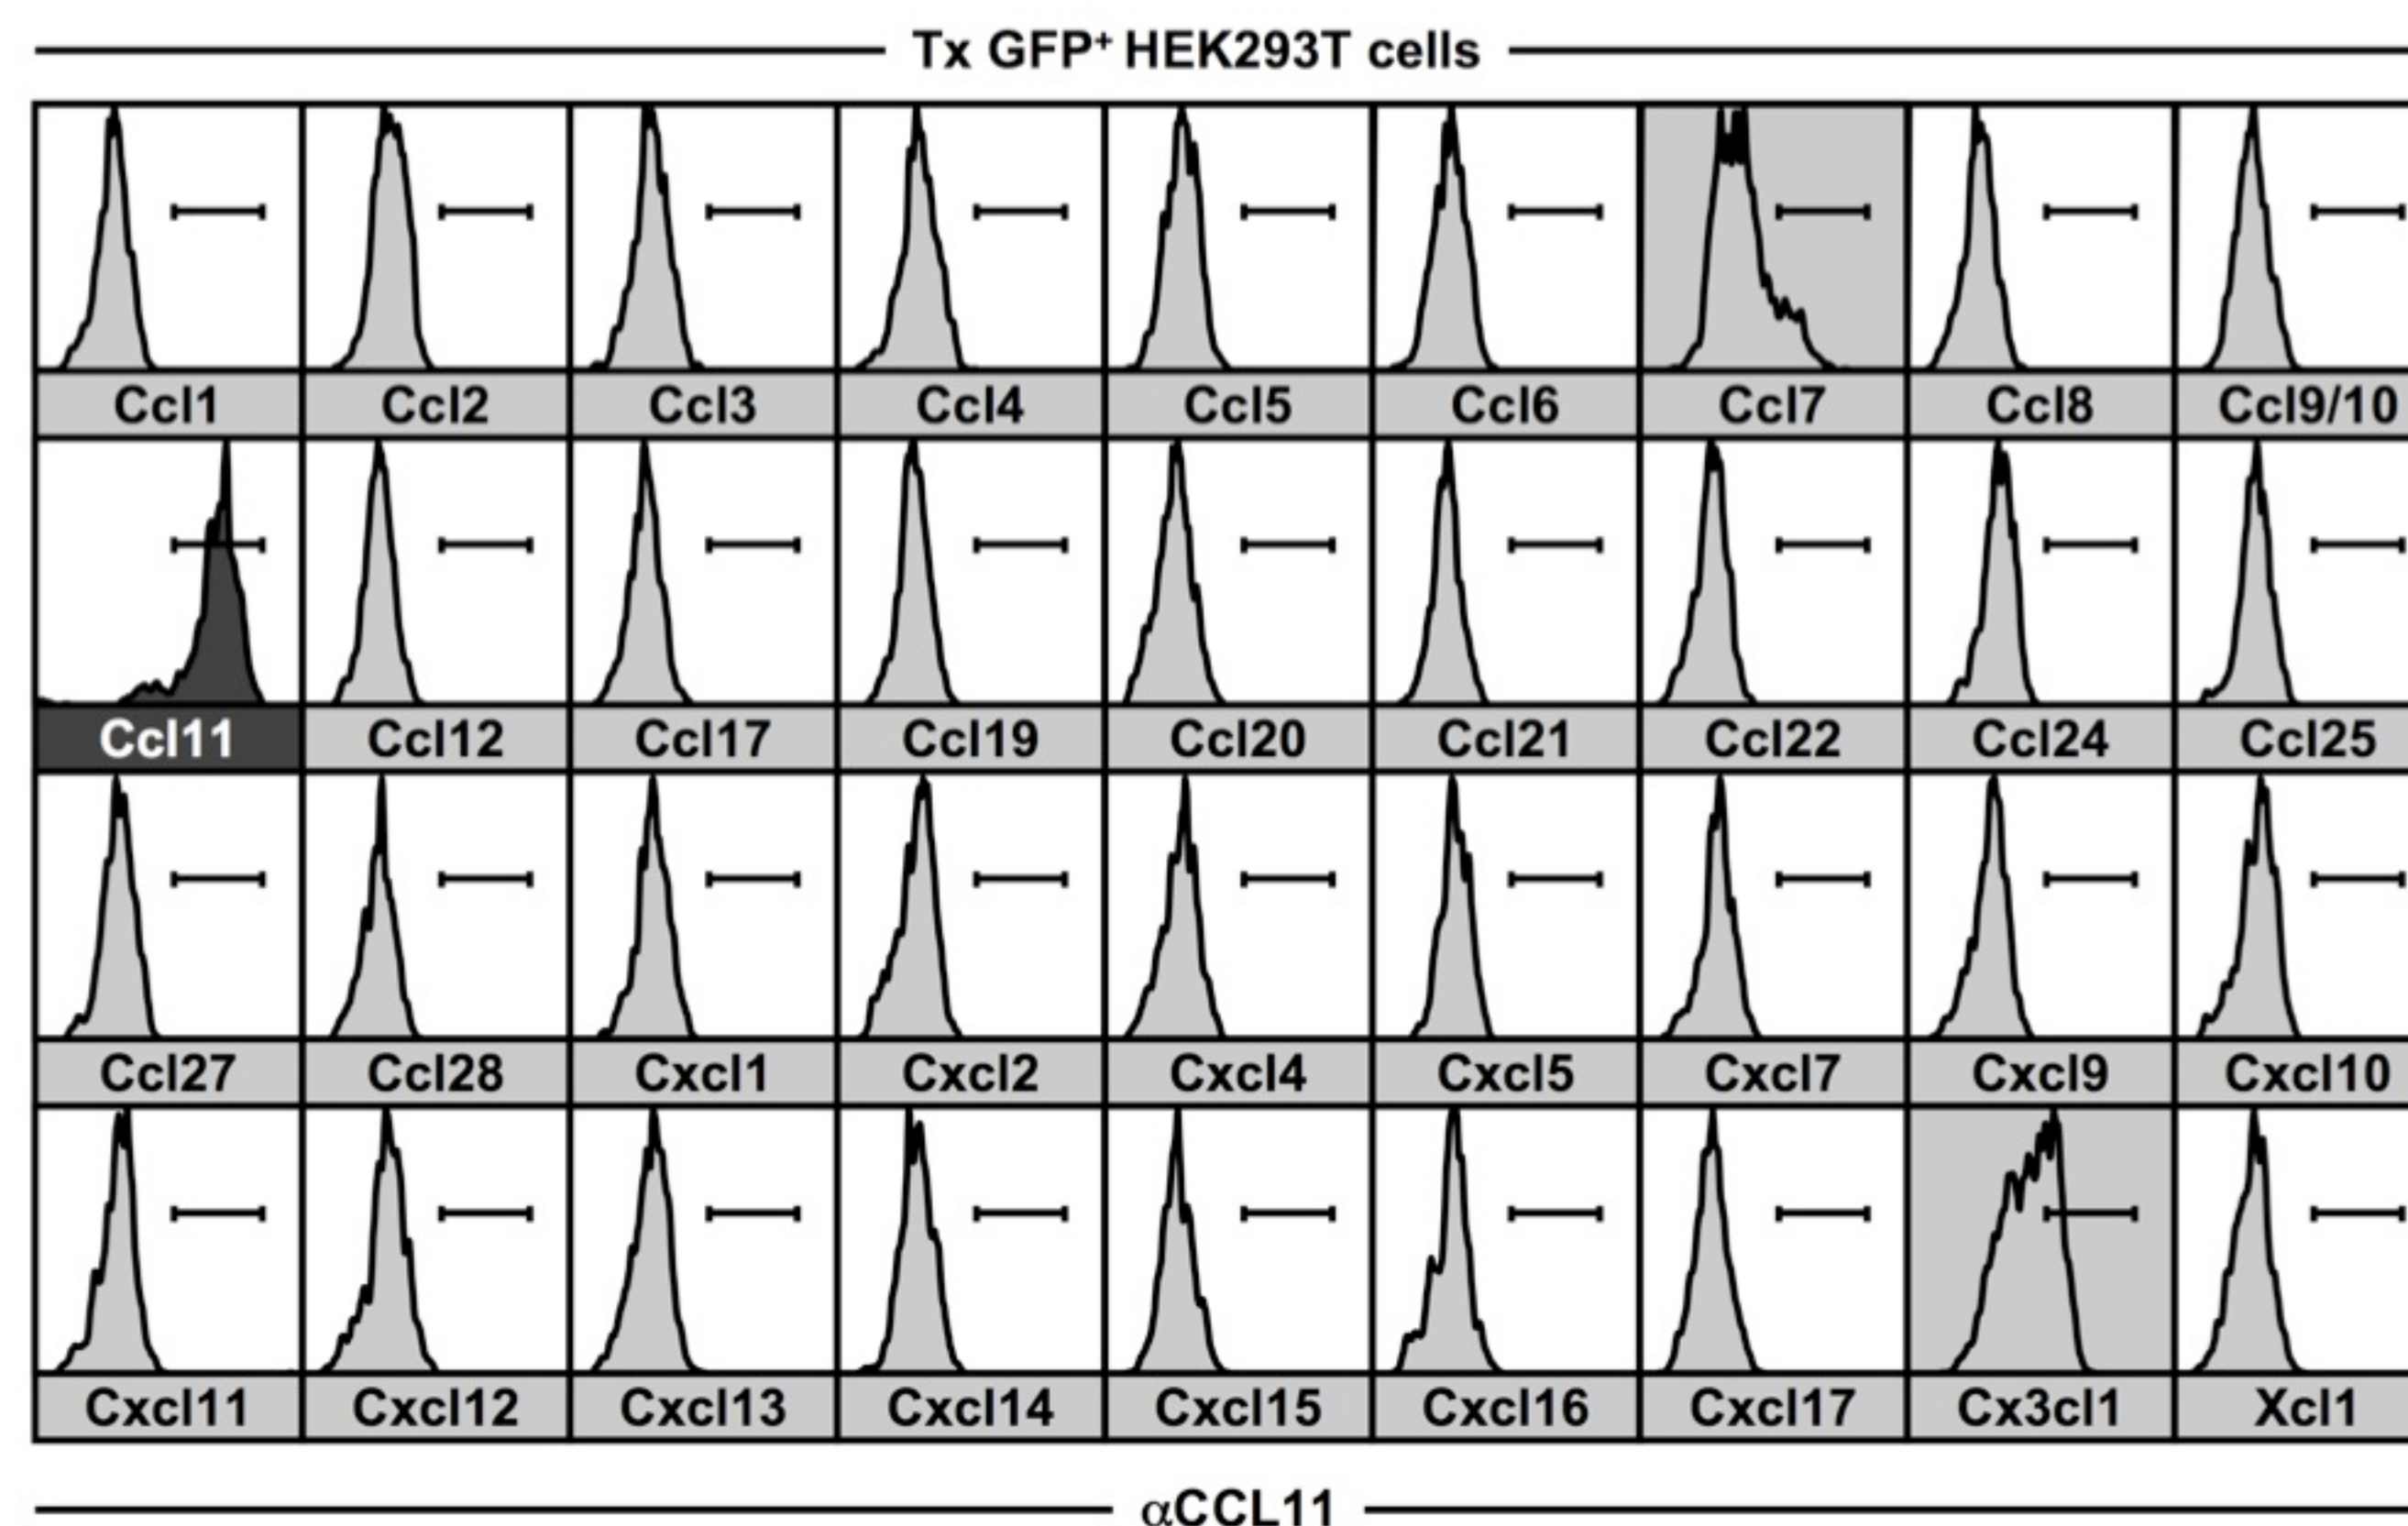

**B.3** ( $\alpha$ CCL12)

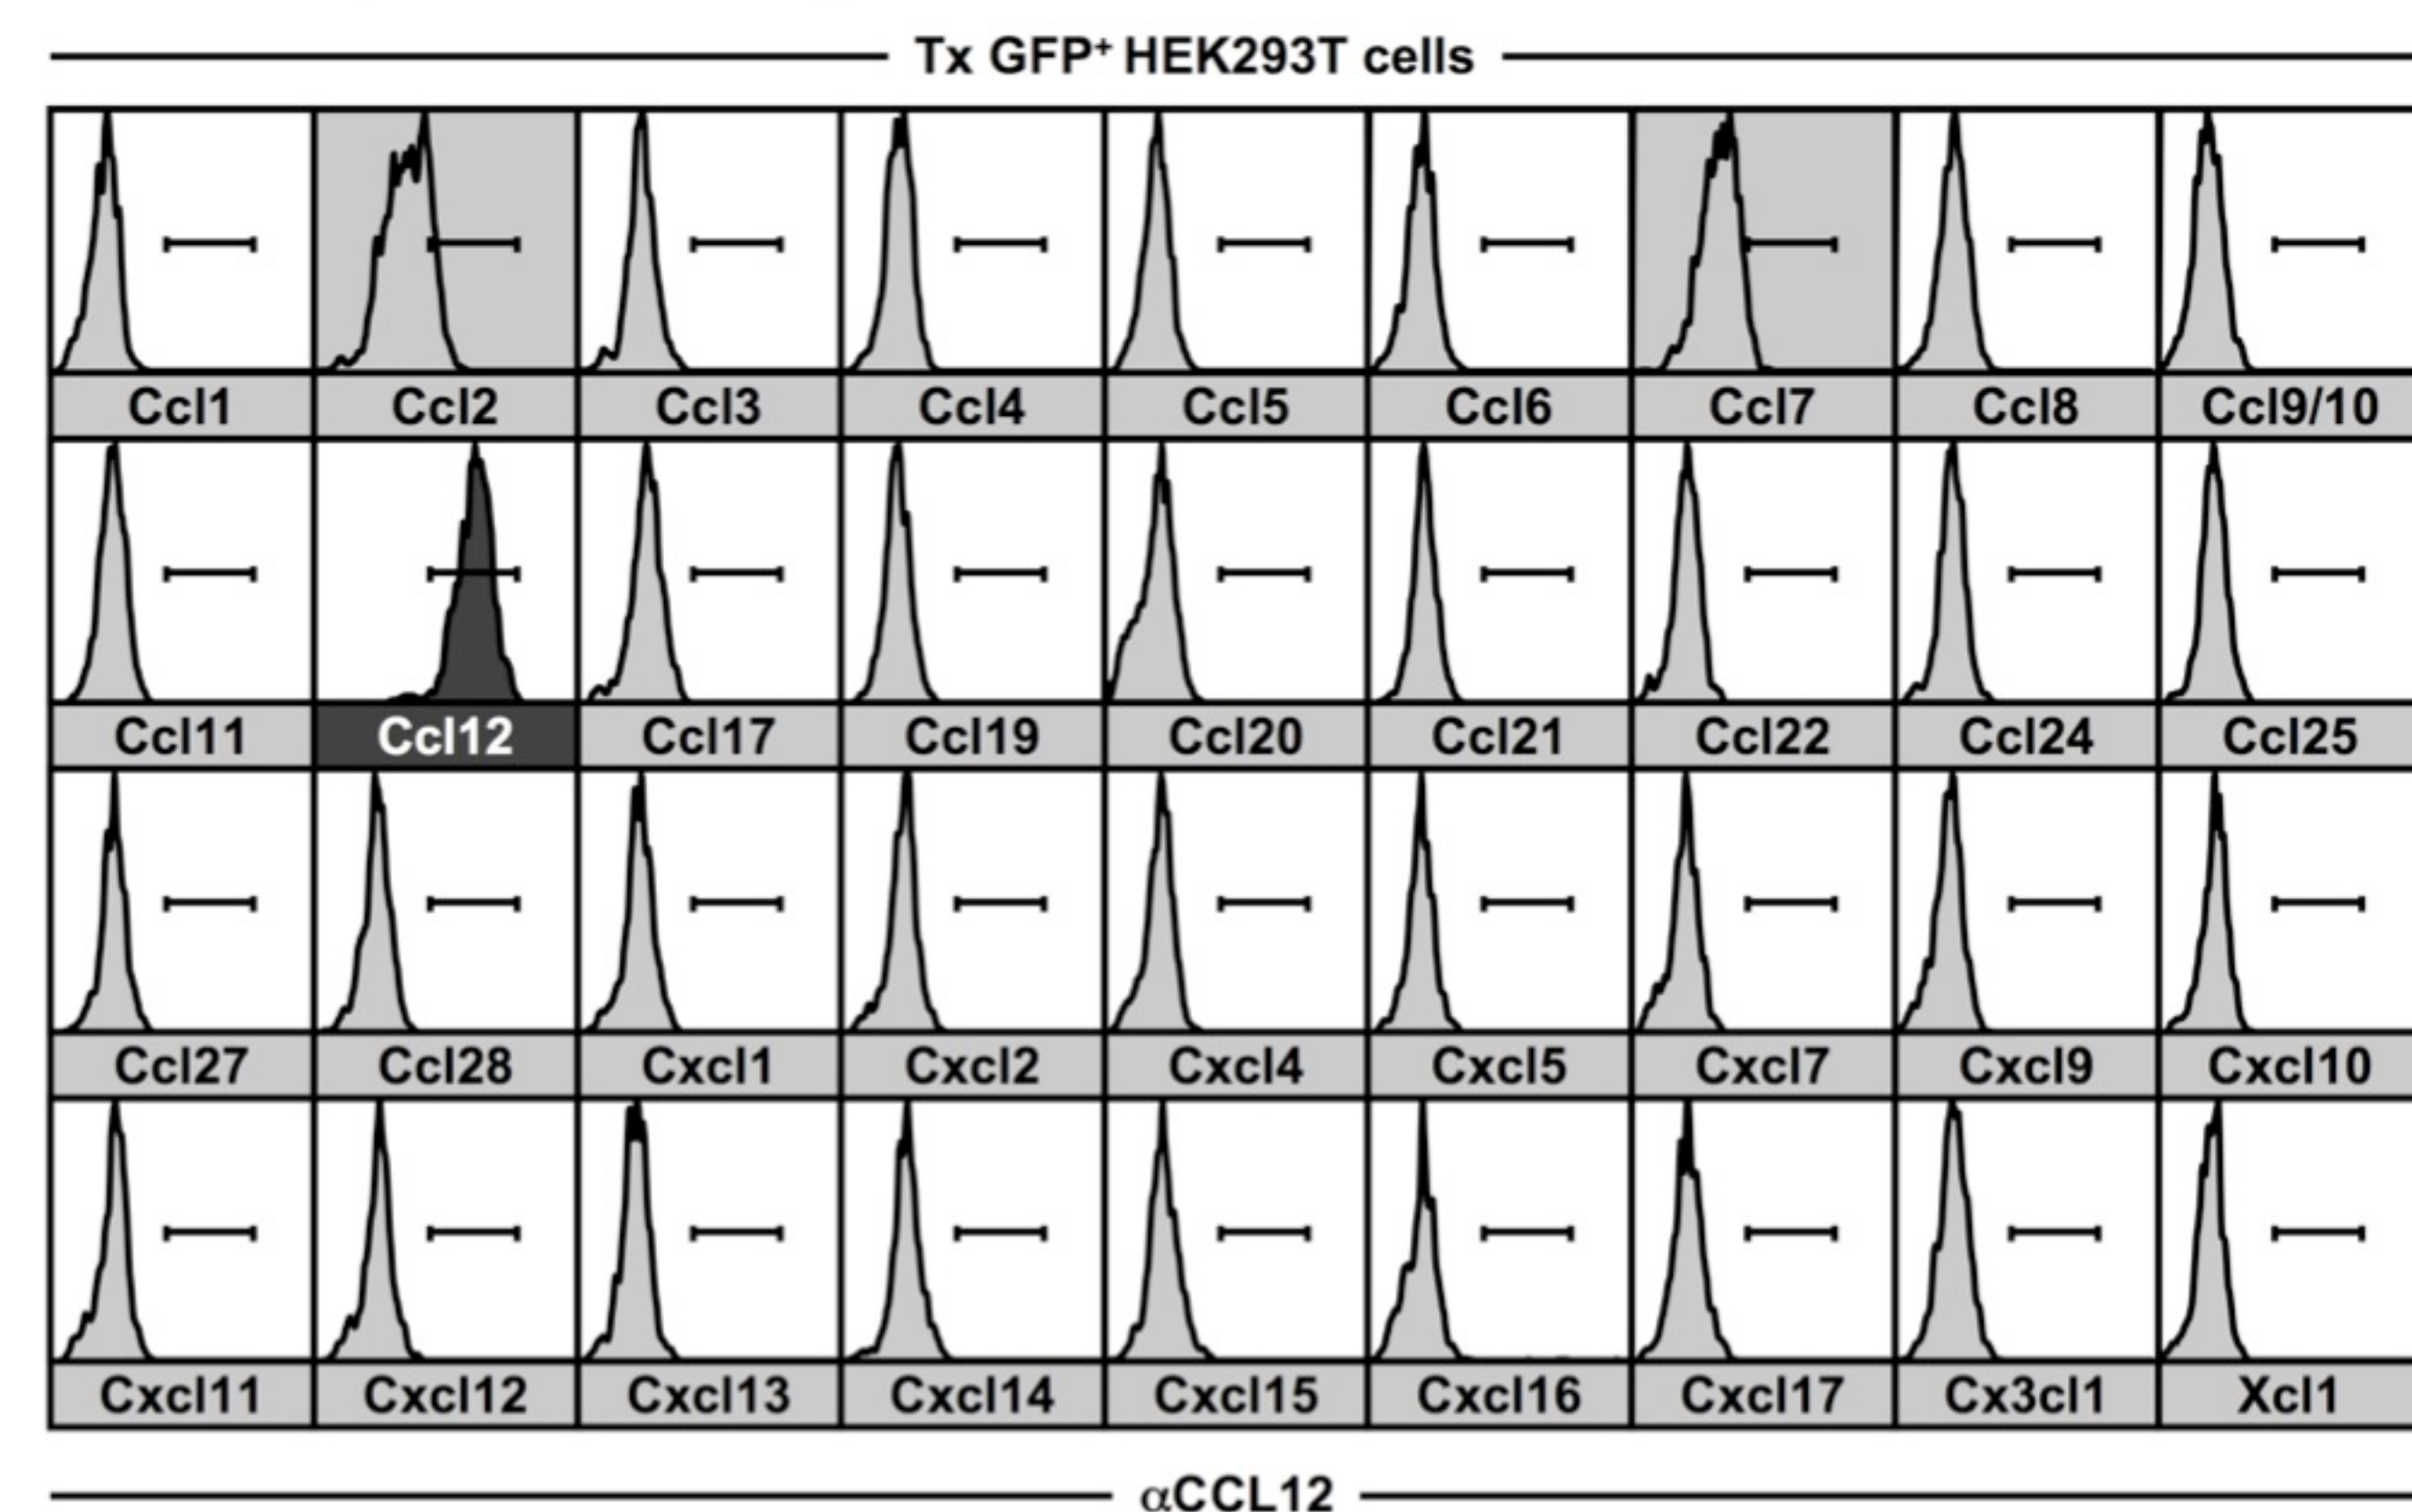

**B.4** ( $\alpha$ CCL17)

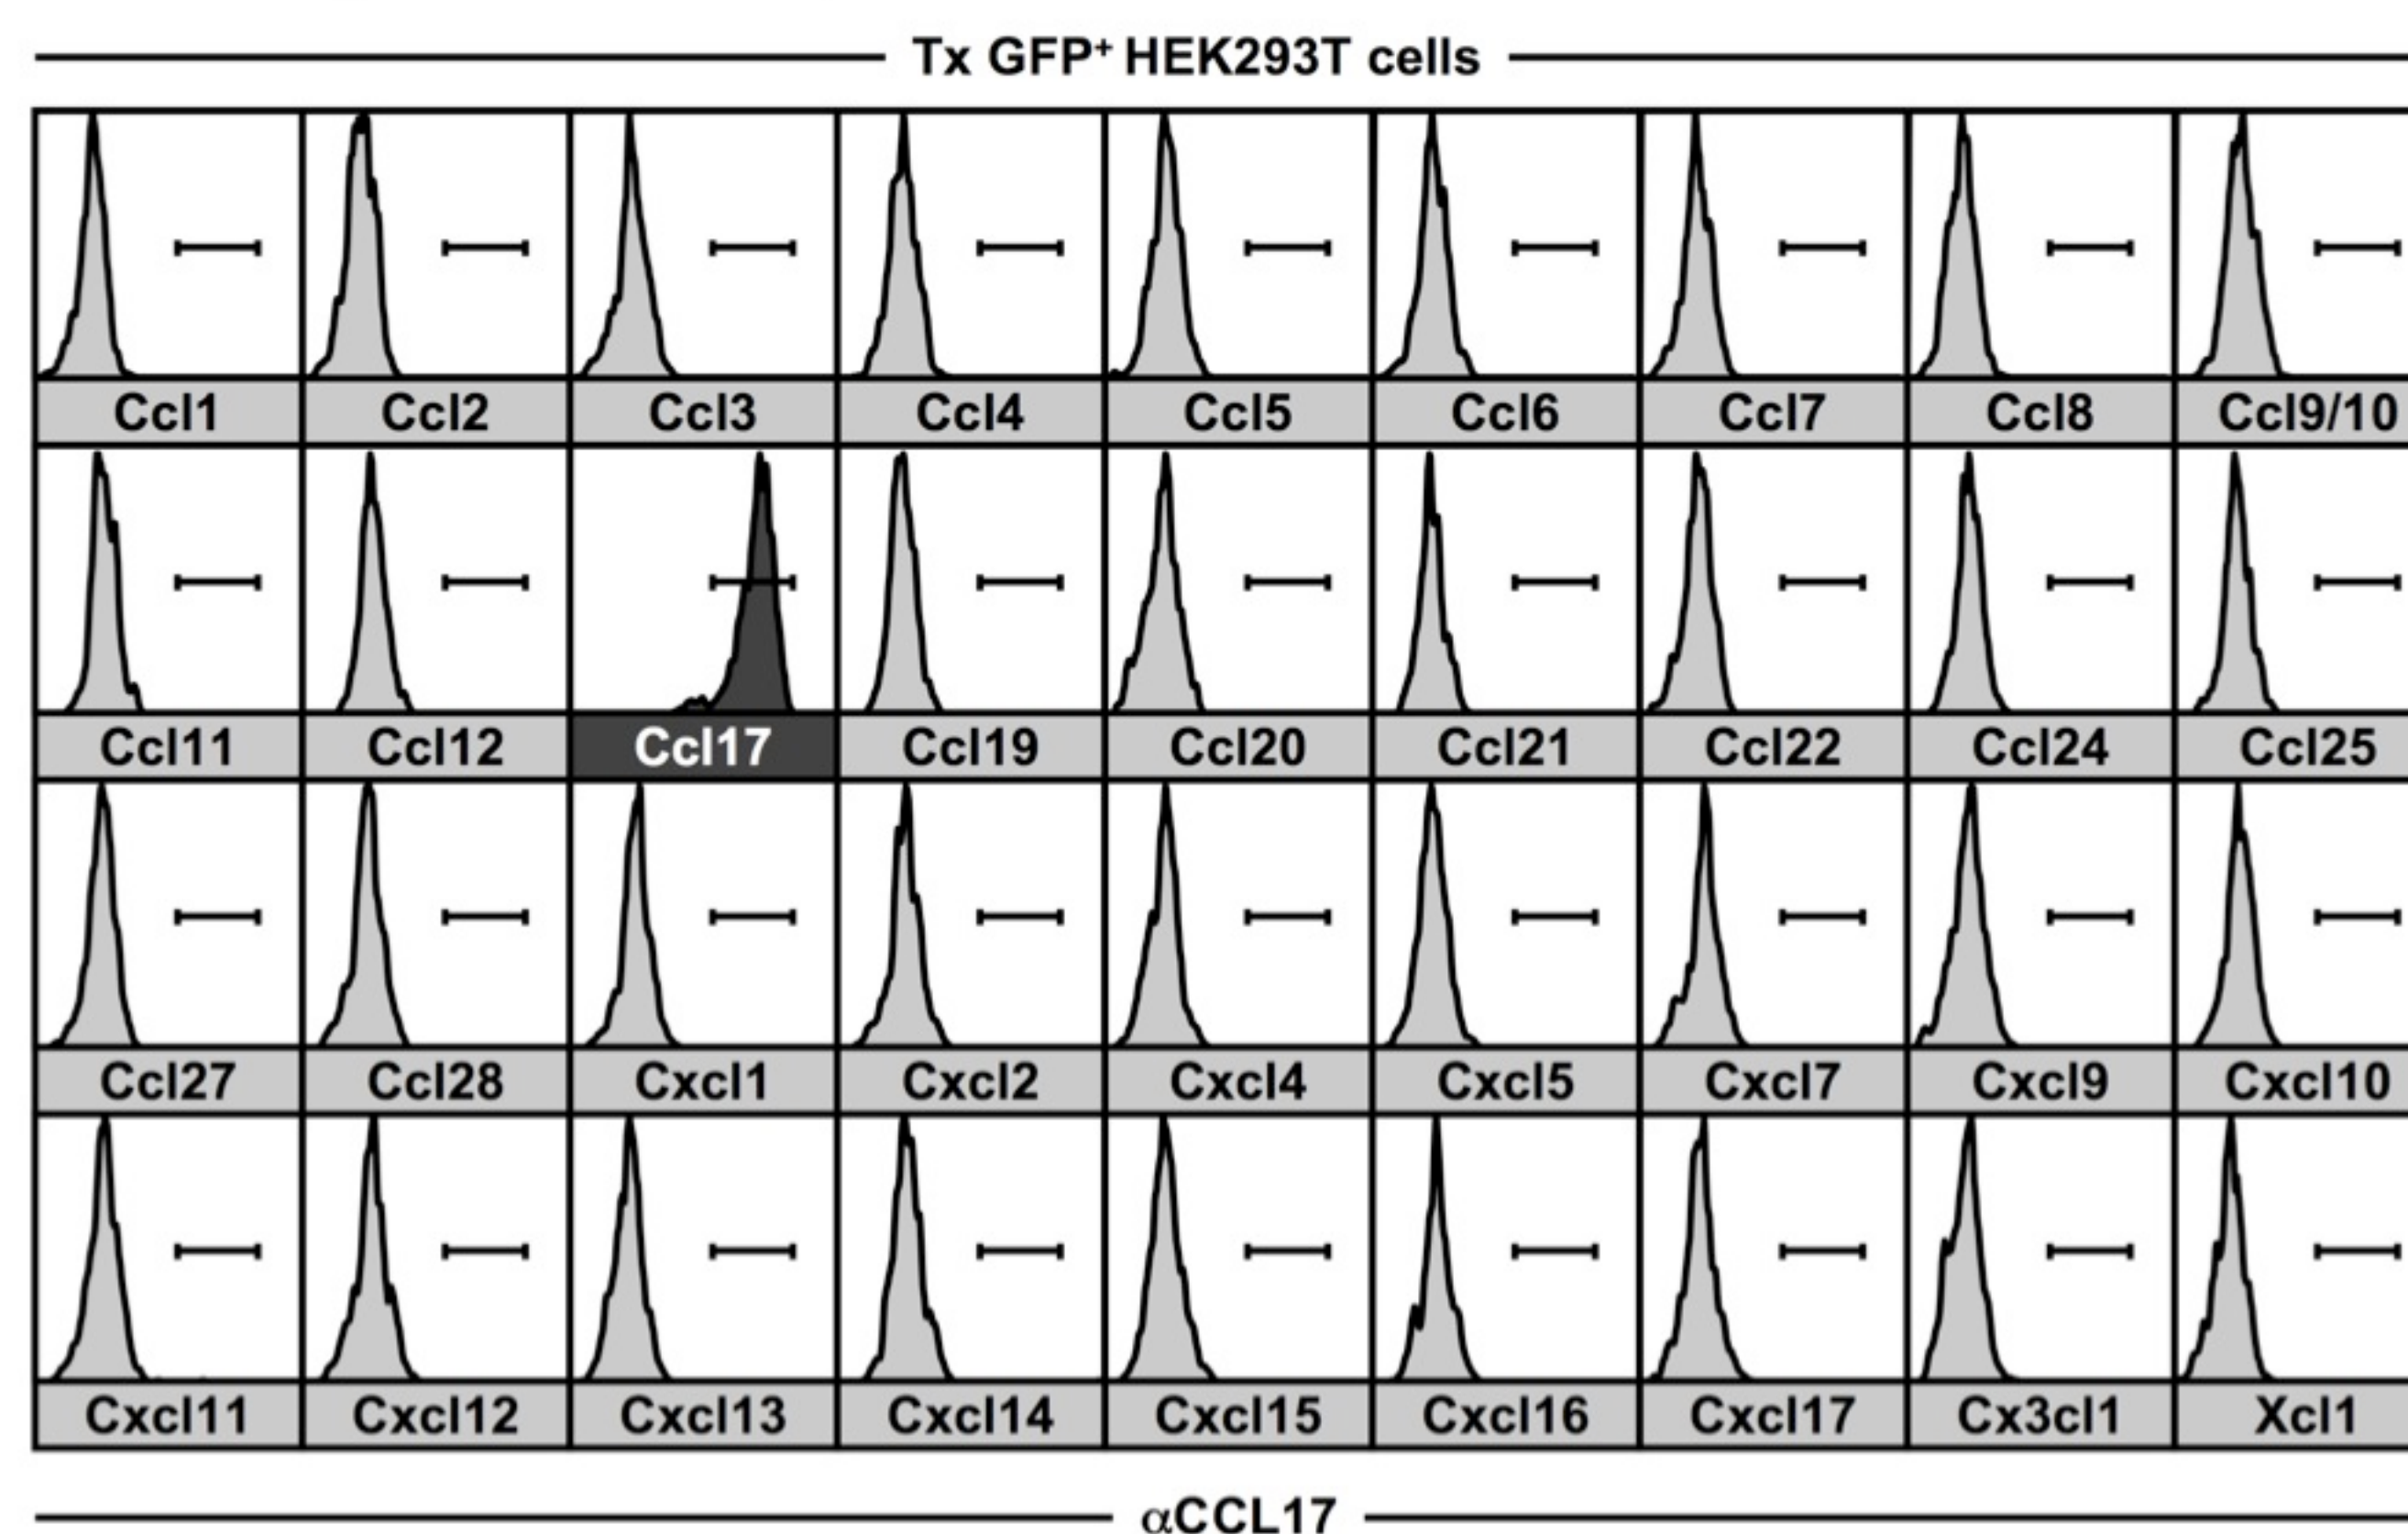

**B.5** ( $\alpha$ CCL19)

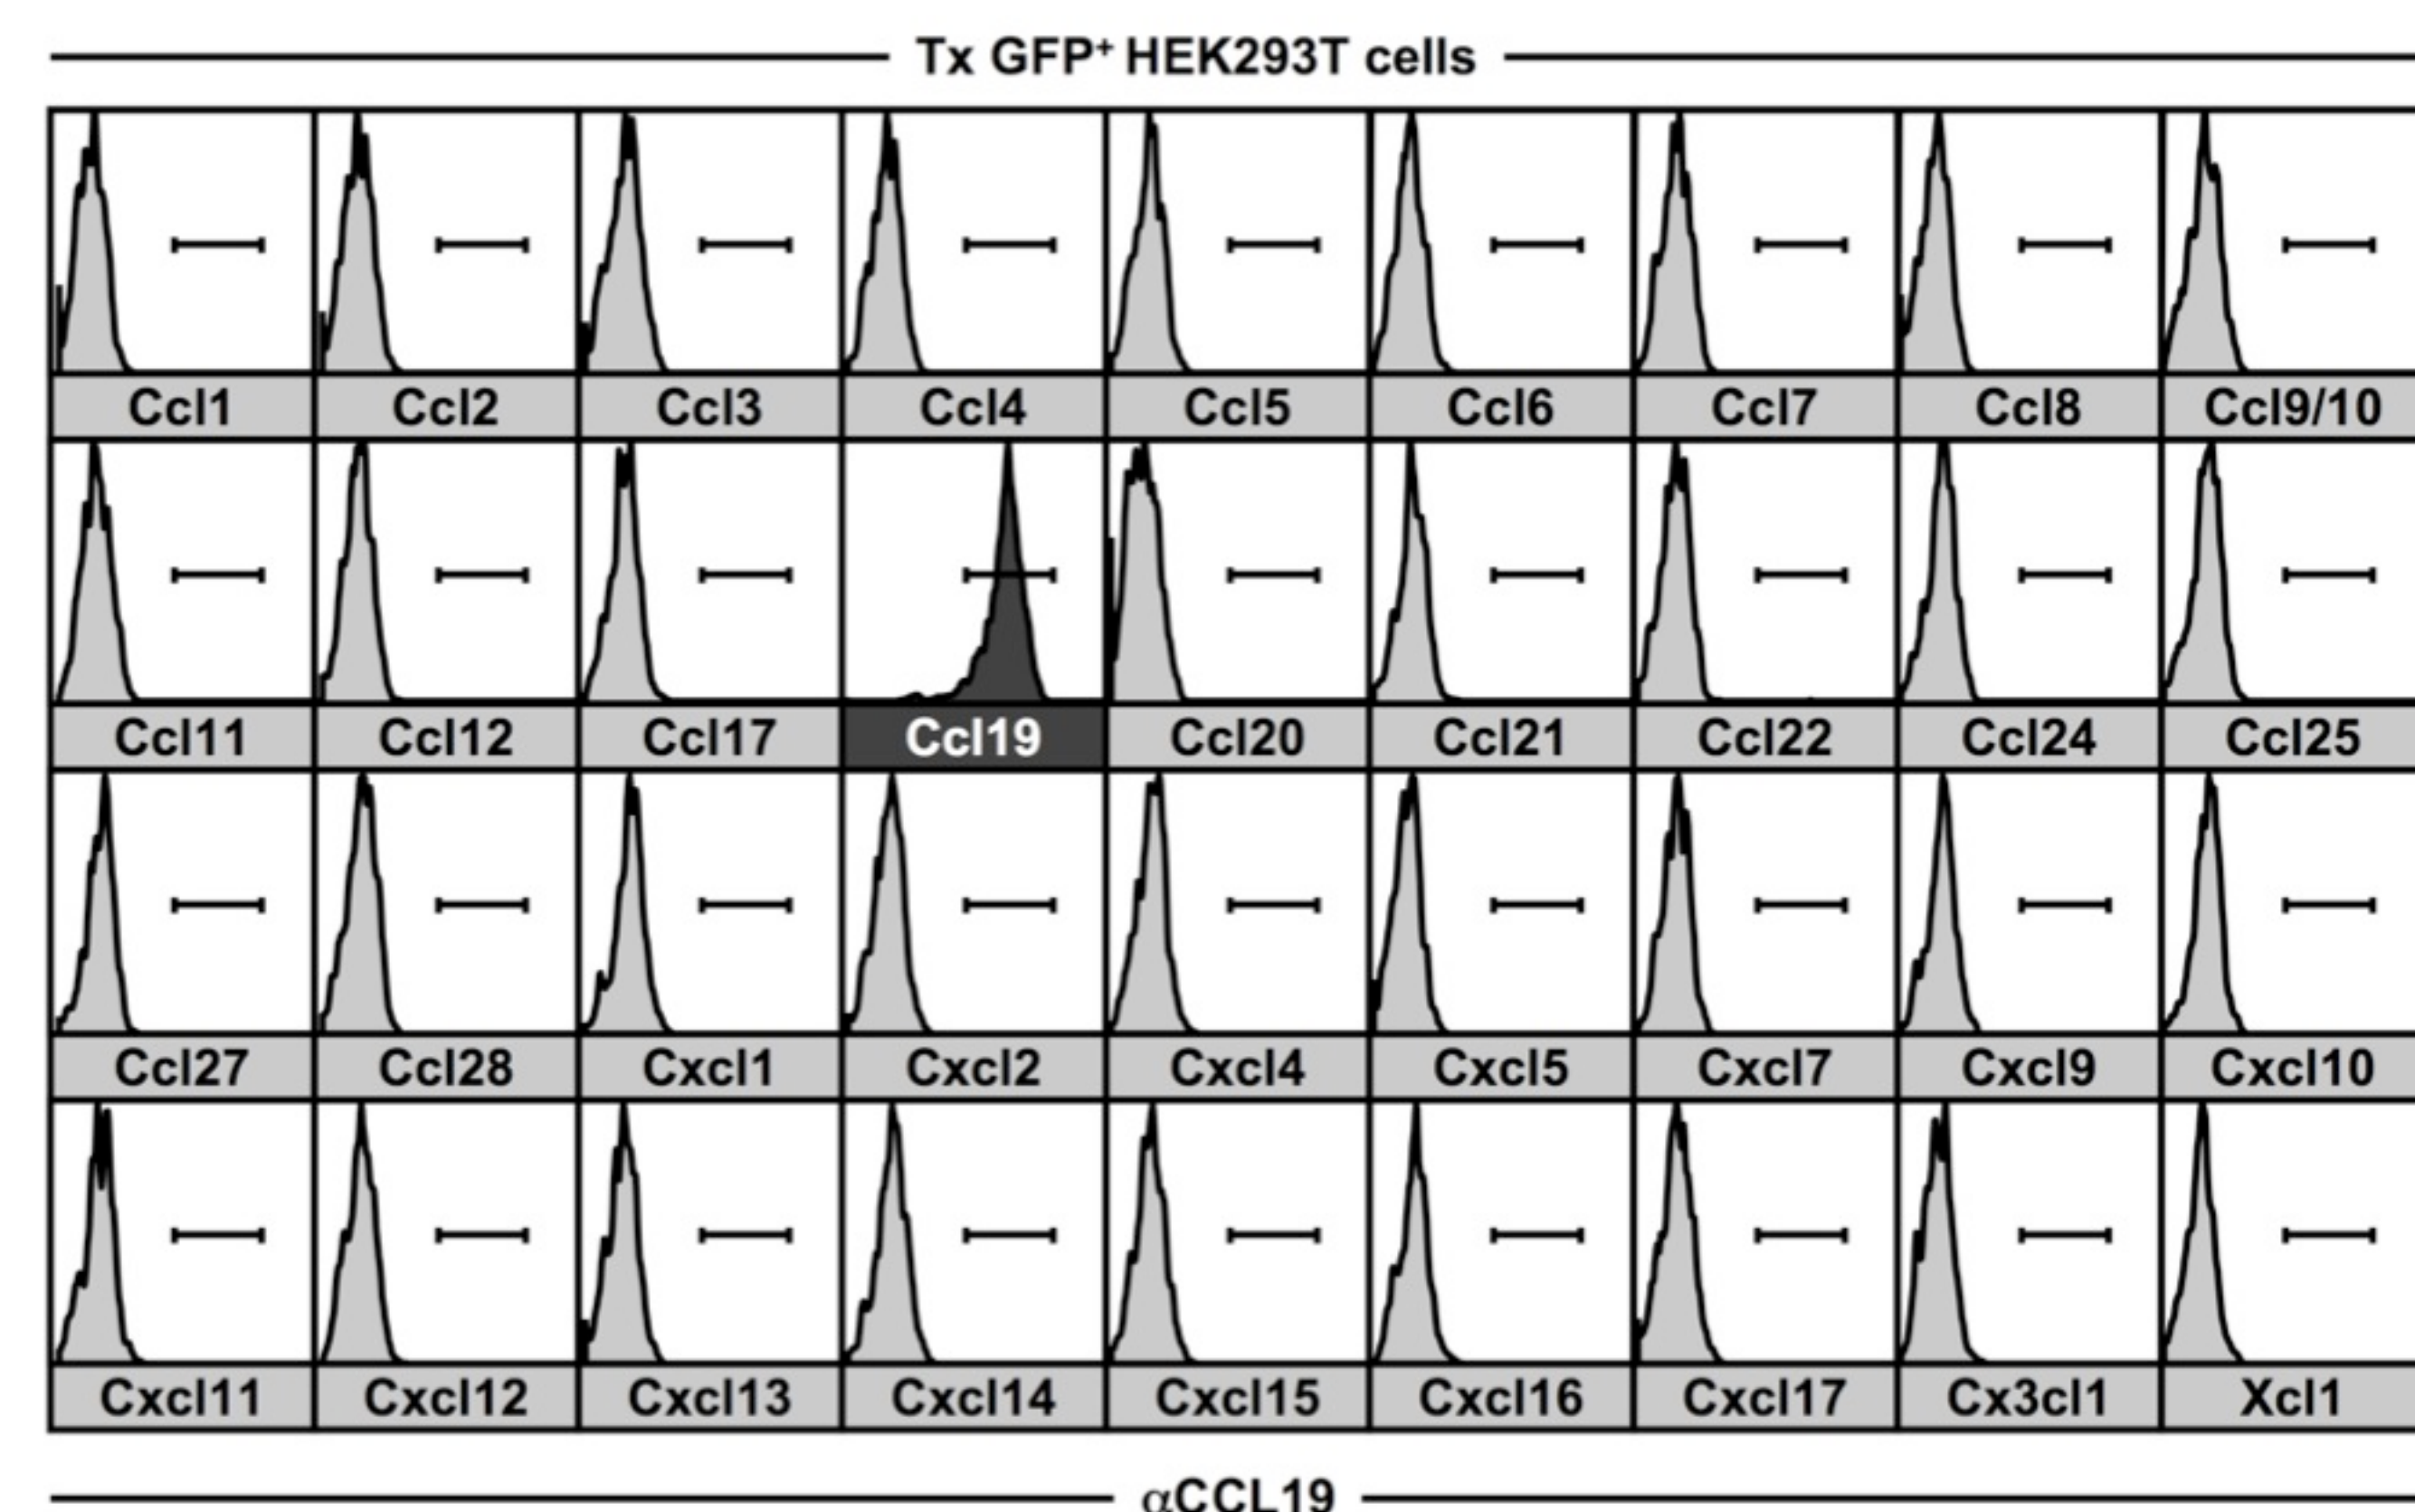

**B.6** ( $\alpha$ CCL20)

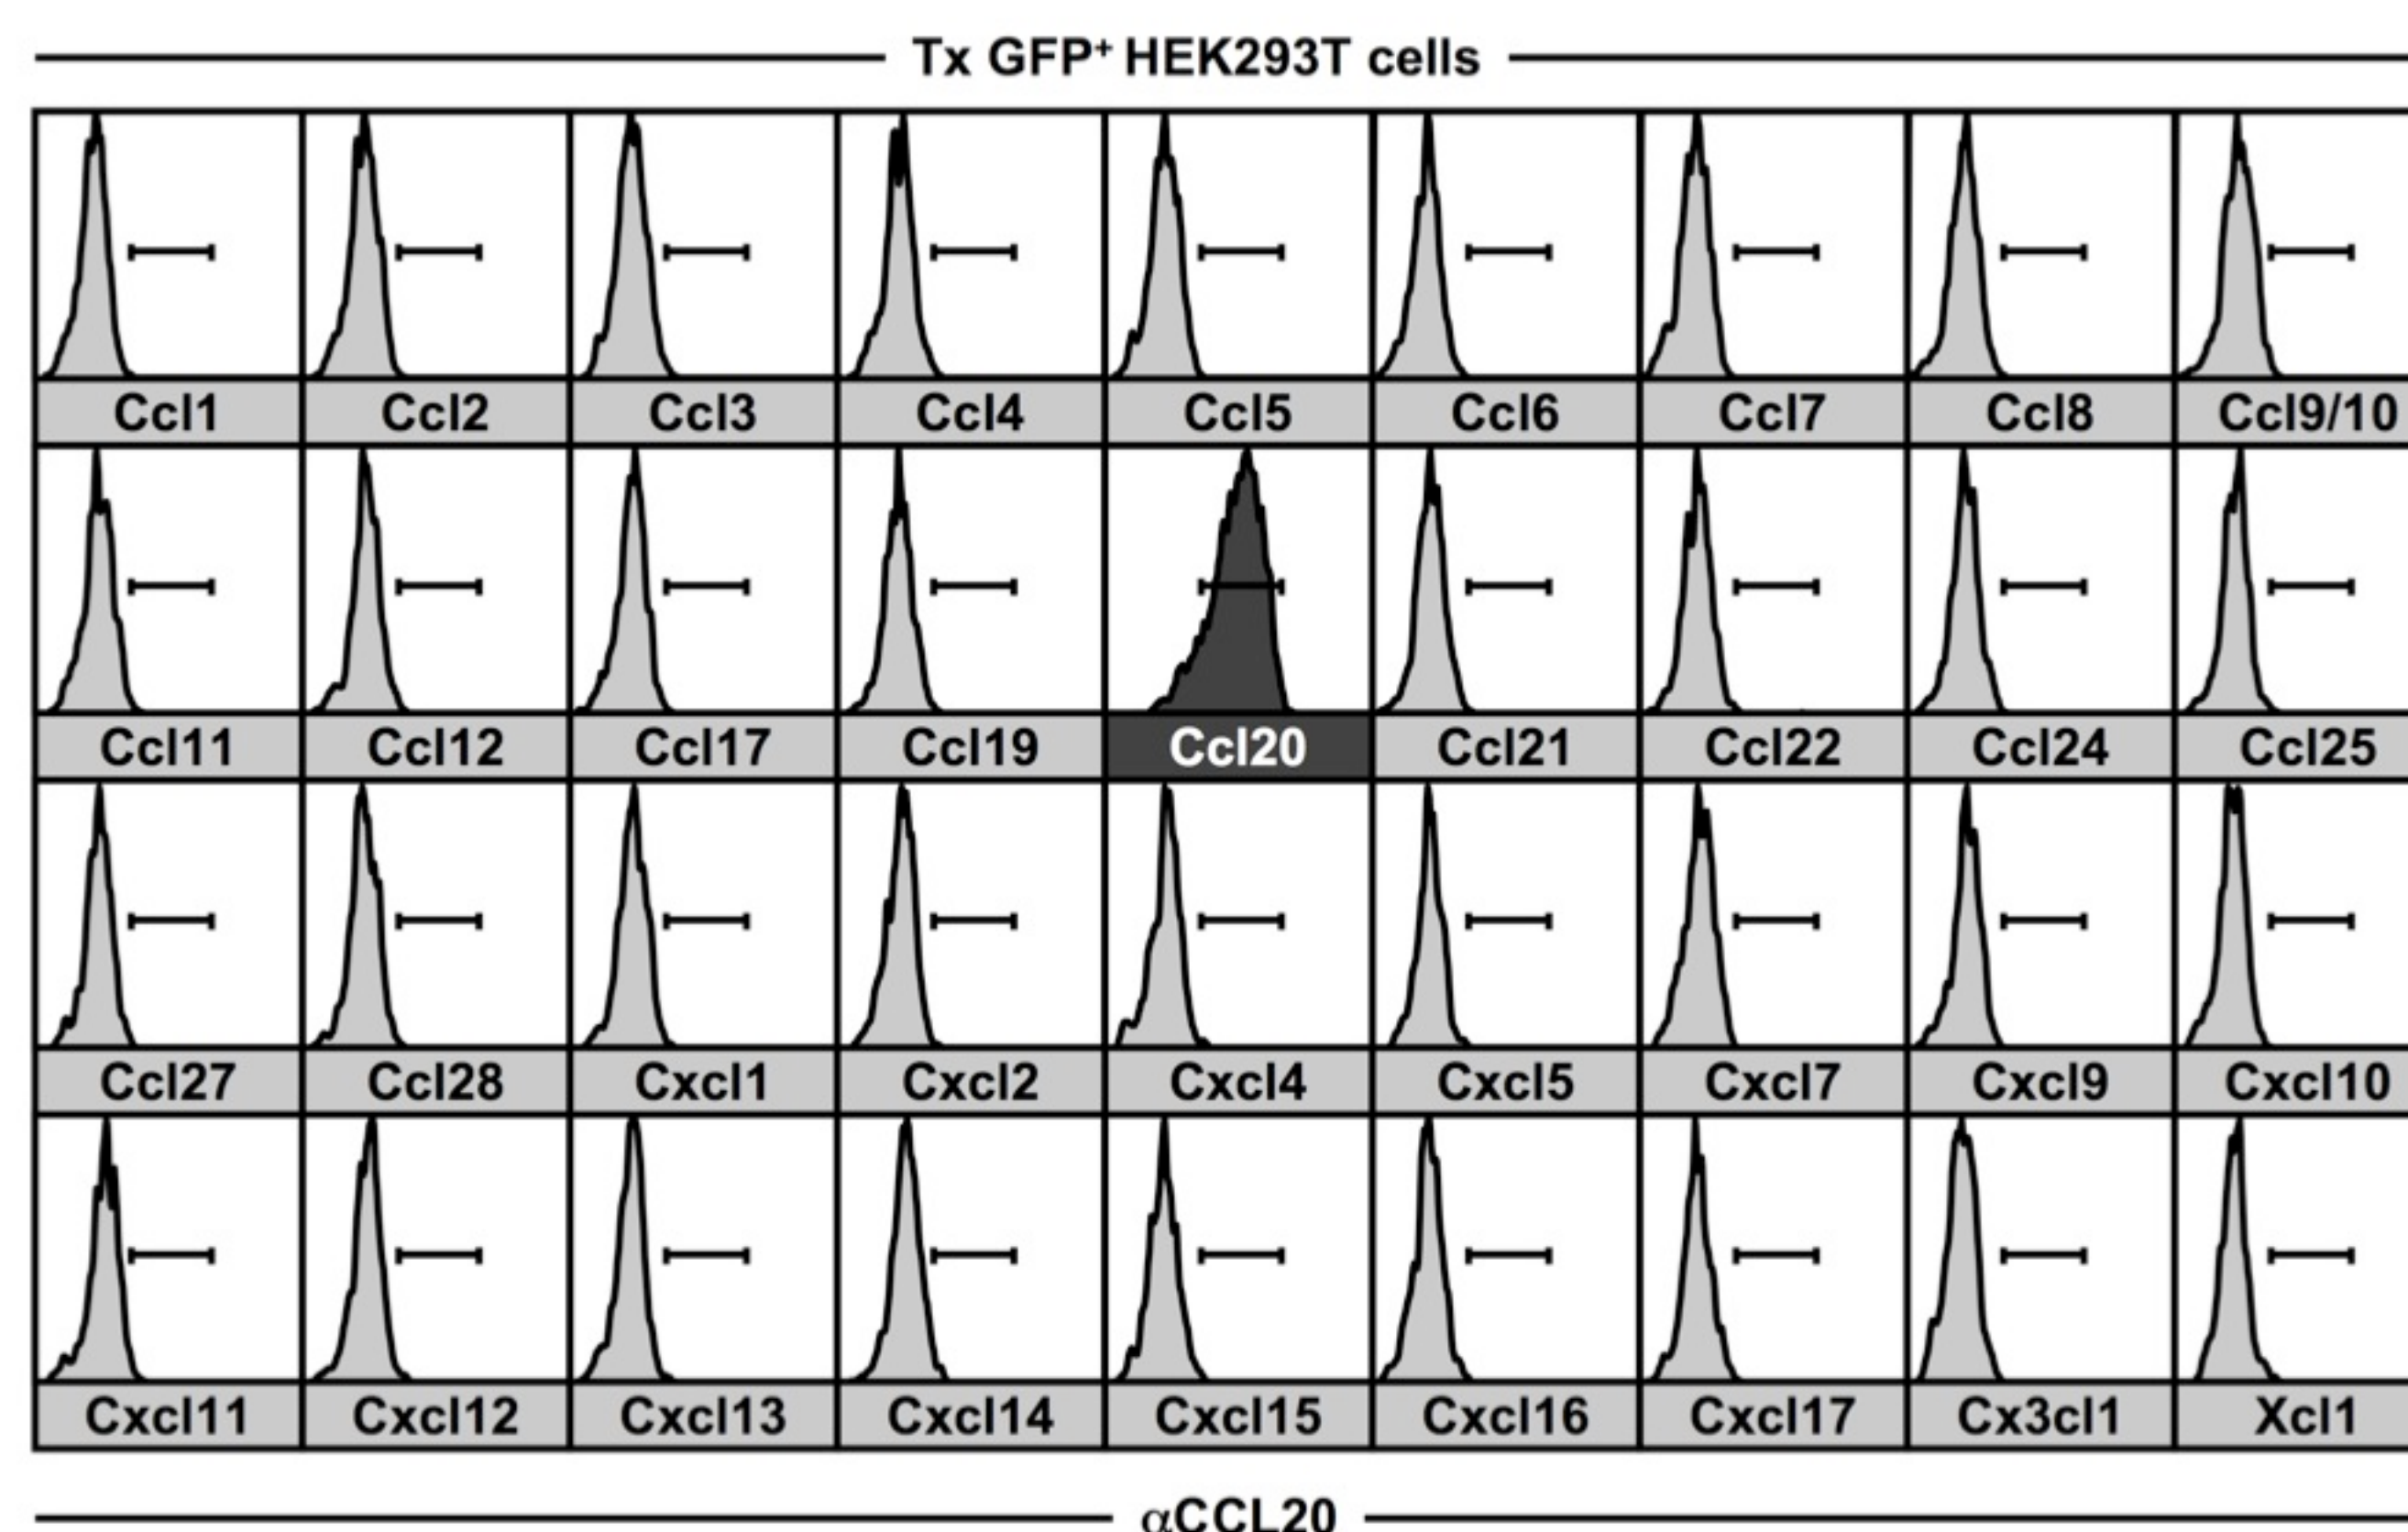

**B.7** ( $\alpha$ CCL21)

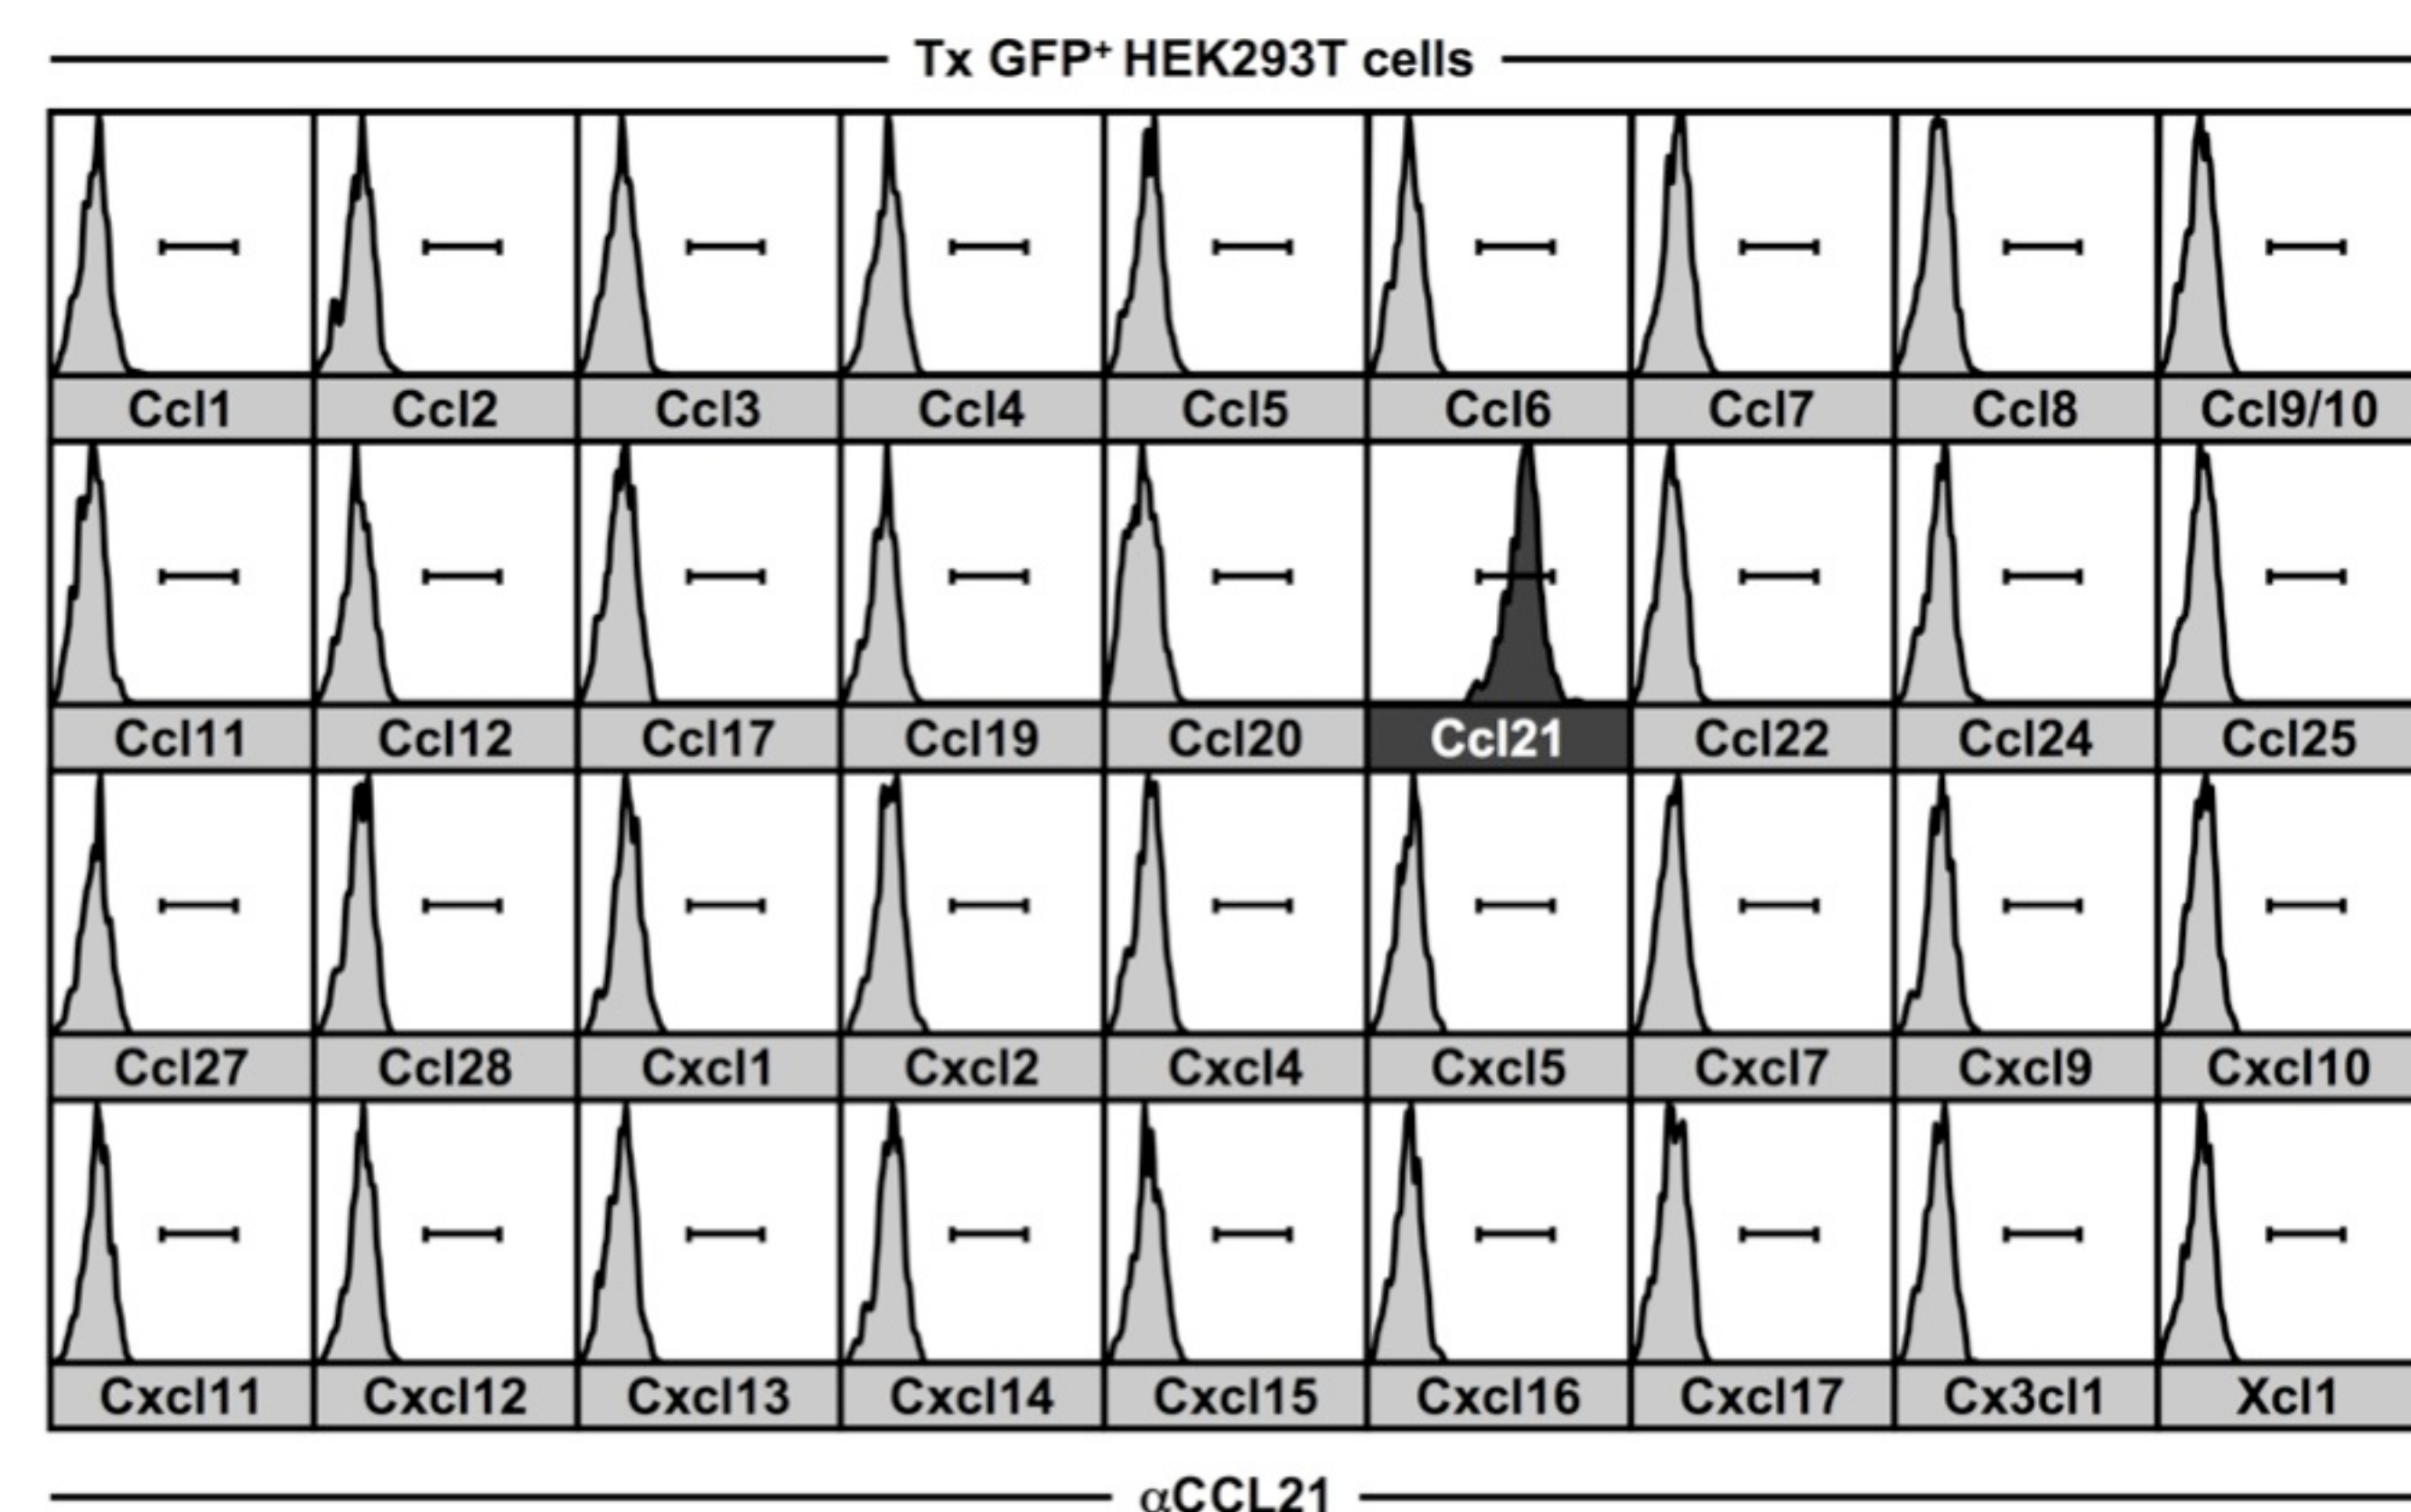

**B.8** ( $\alpha$ CCL22)

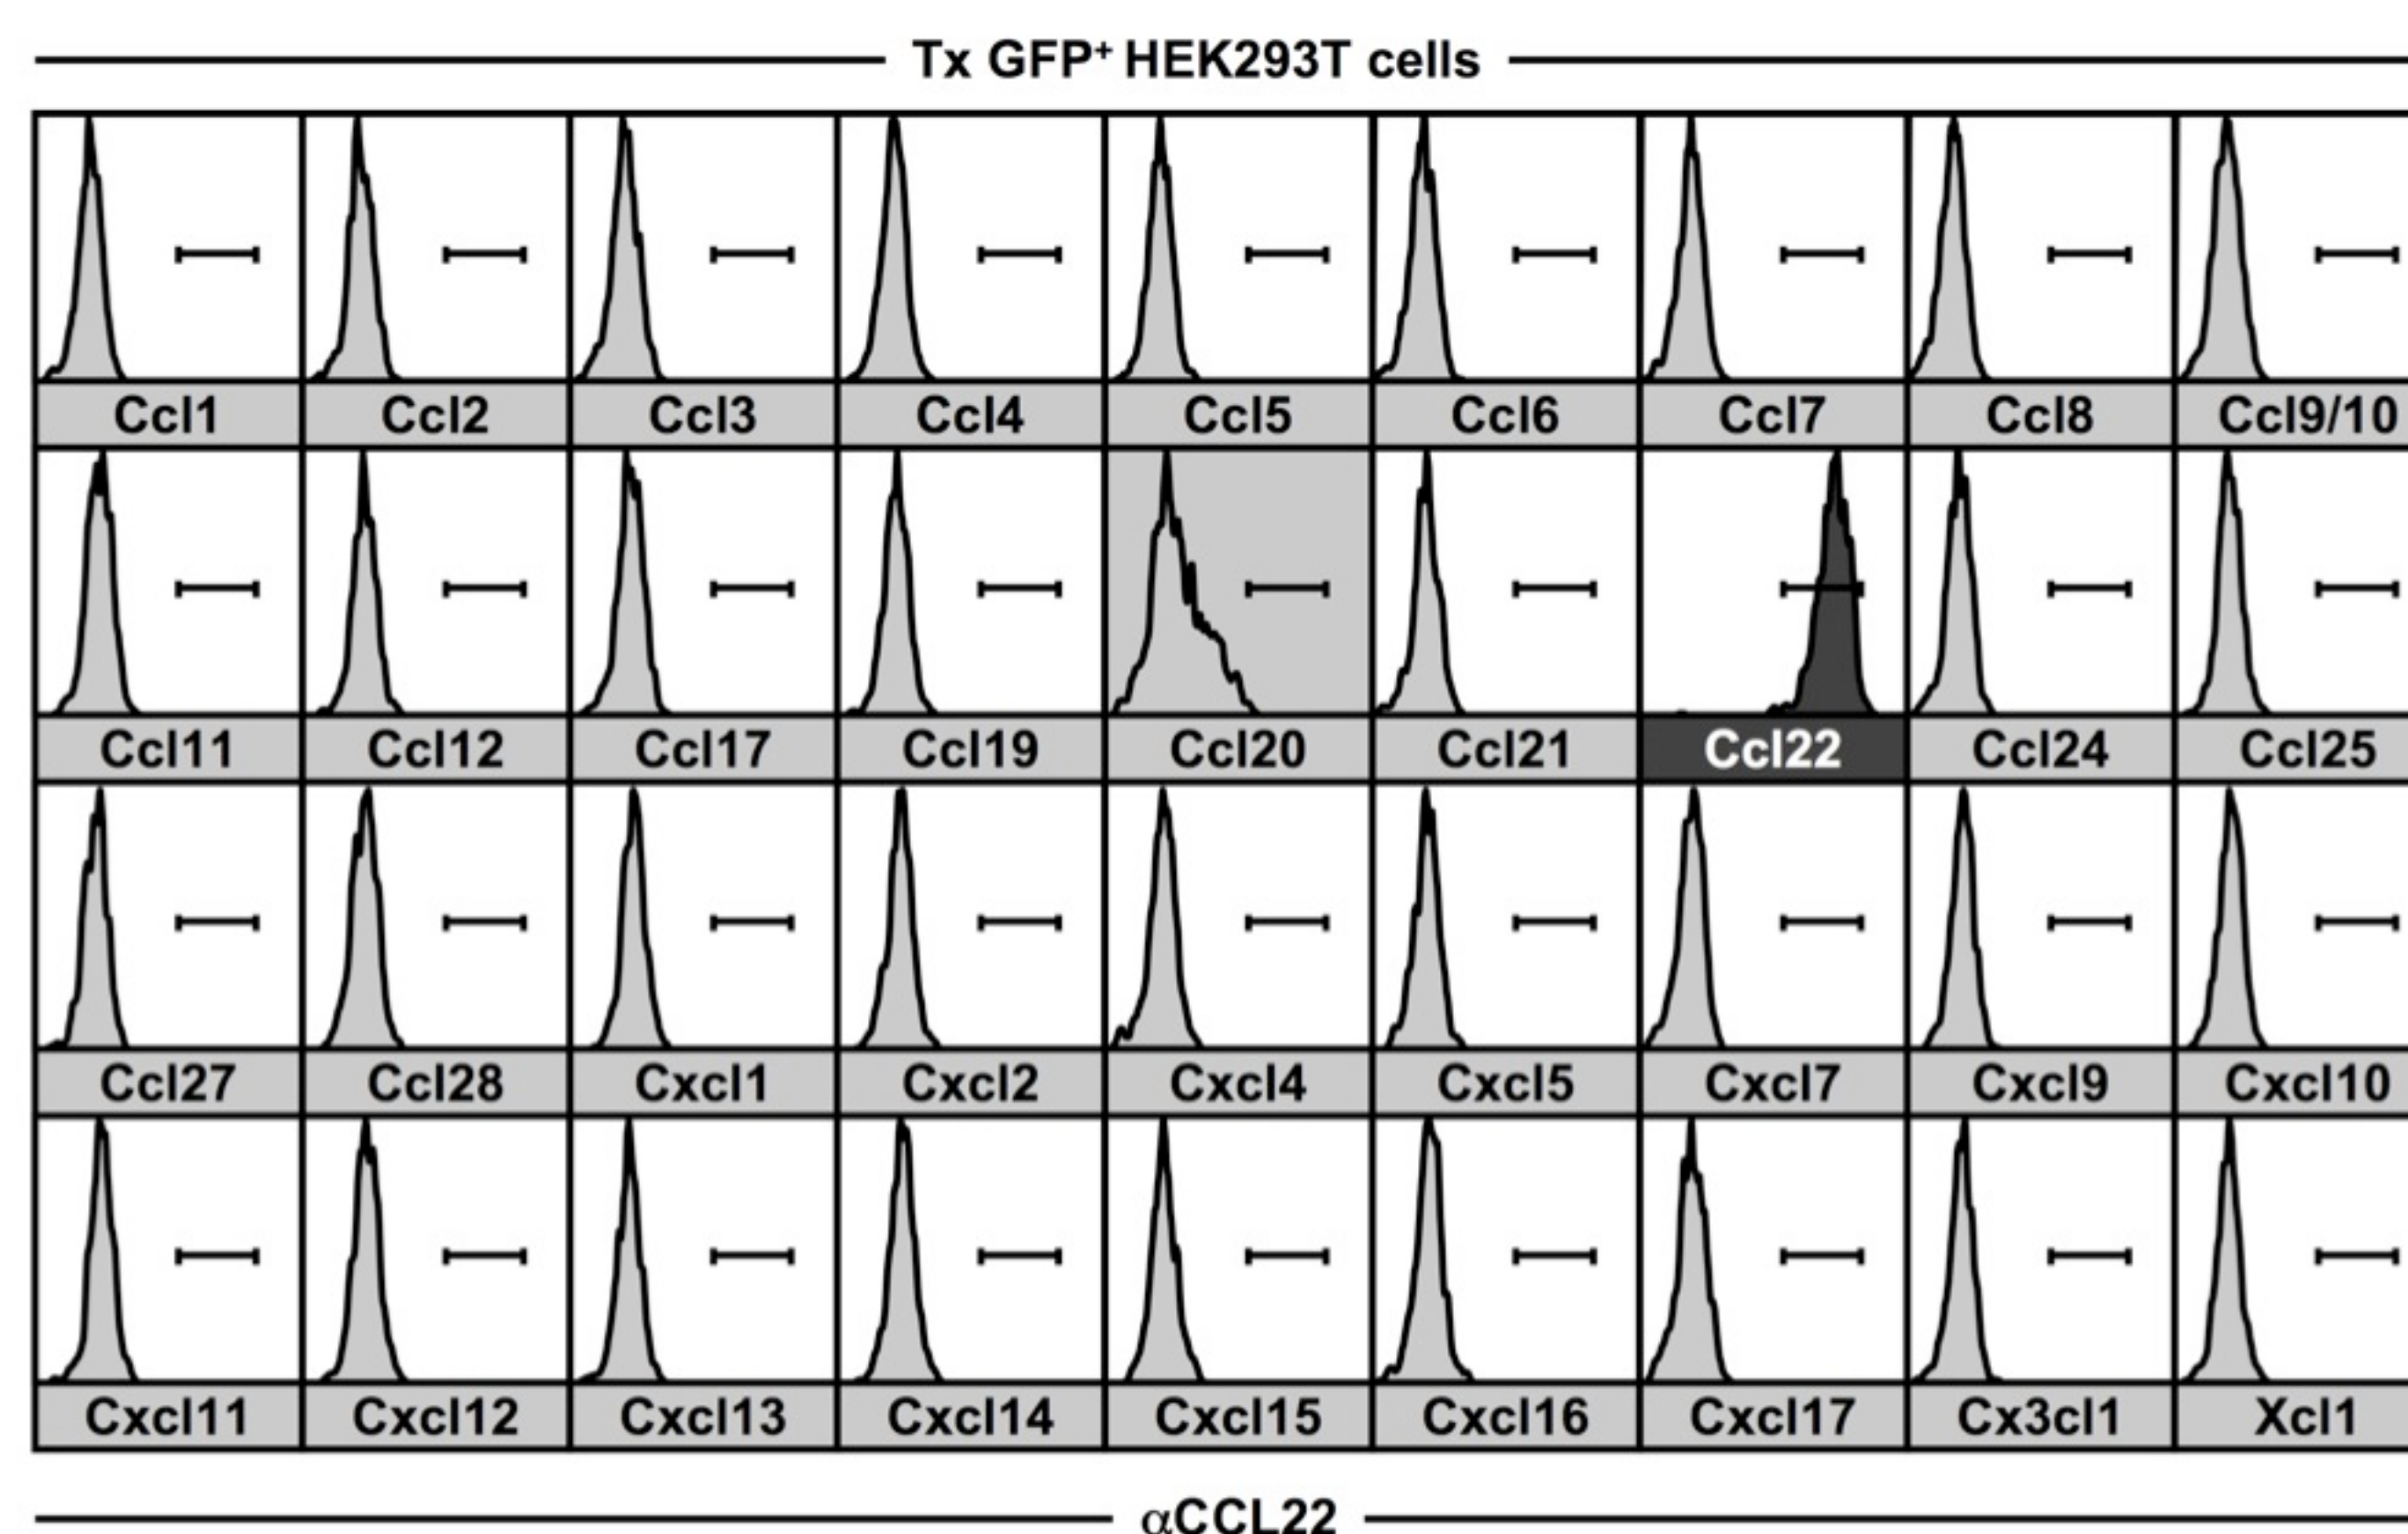

Figure S1, panels C.1-C.8

C.1 ( $\alpha$ CCL24)

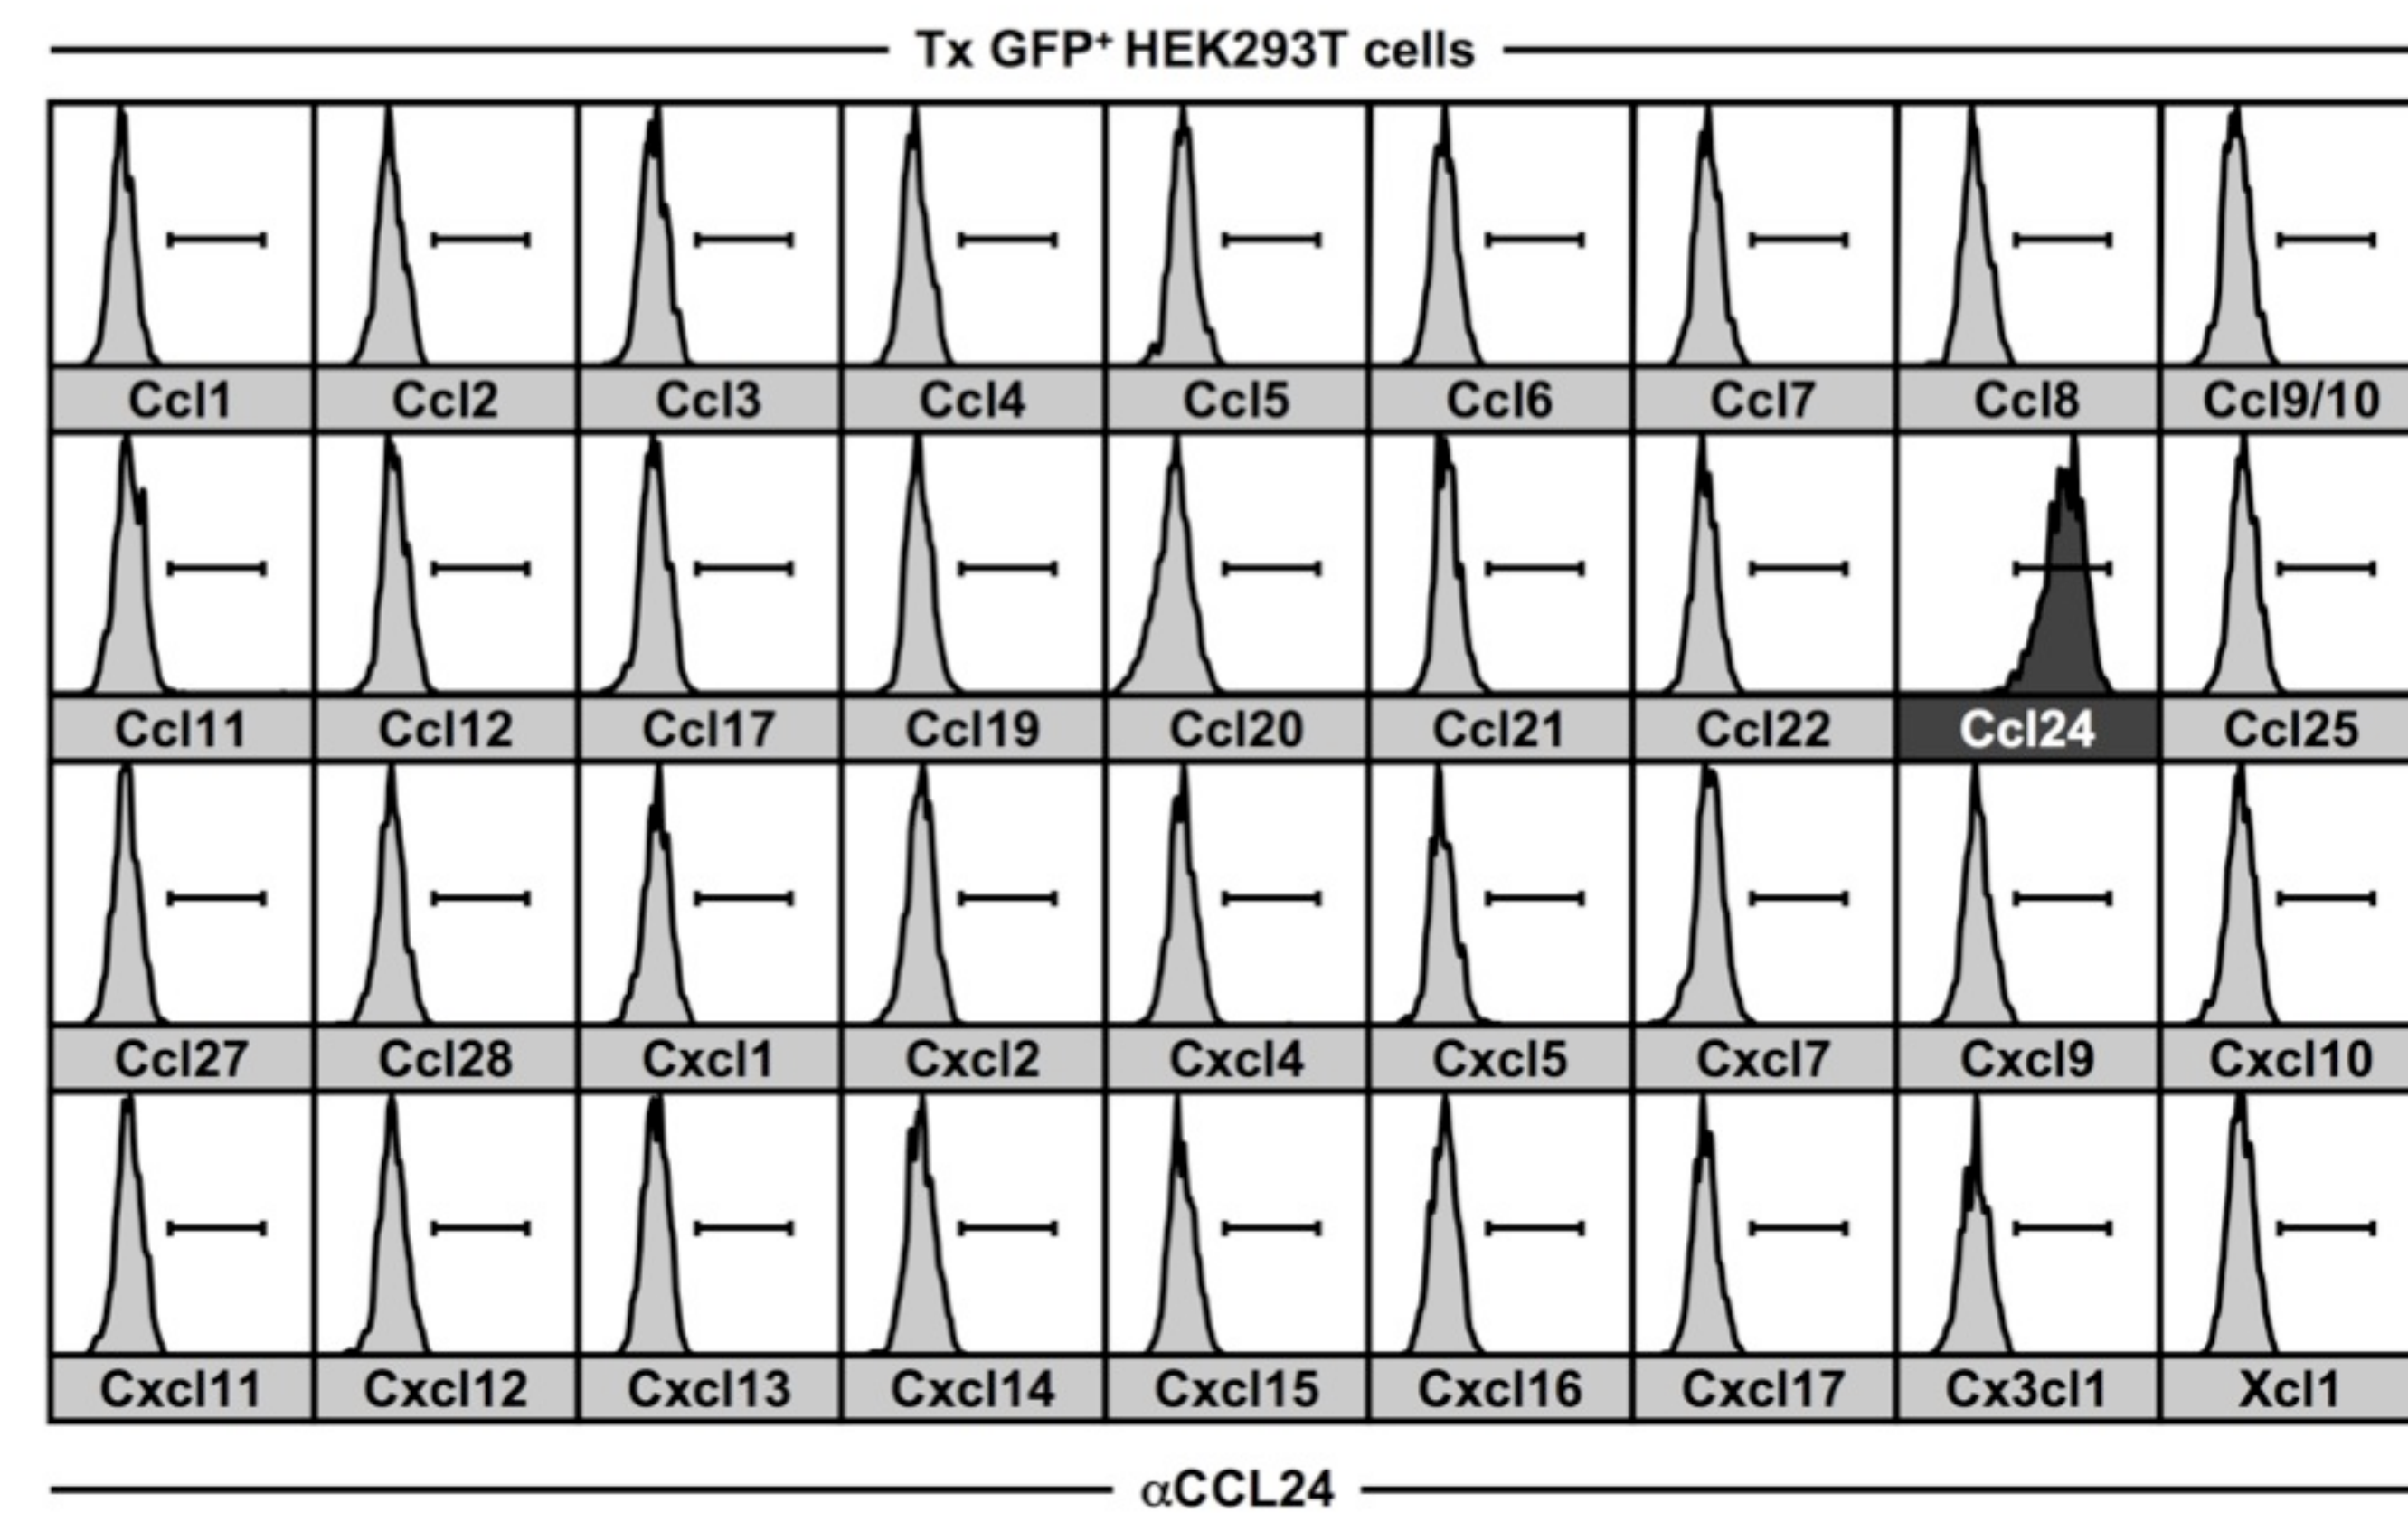

C.2 ( $\alpha$ CCL25)

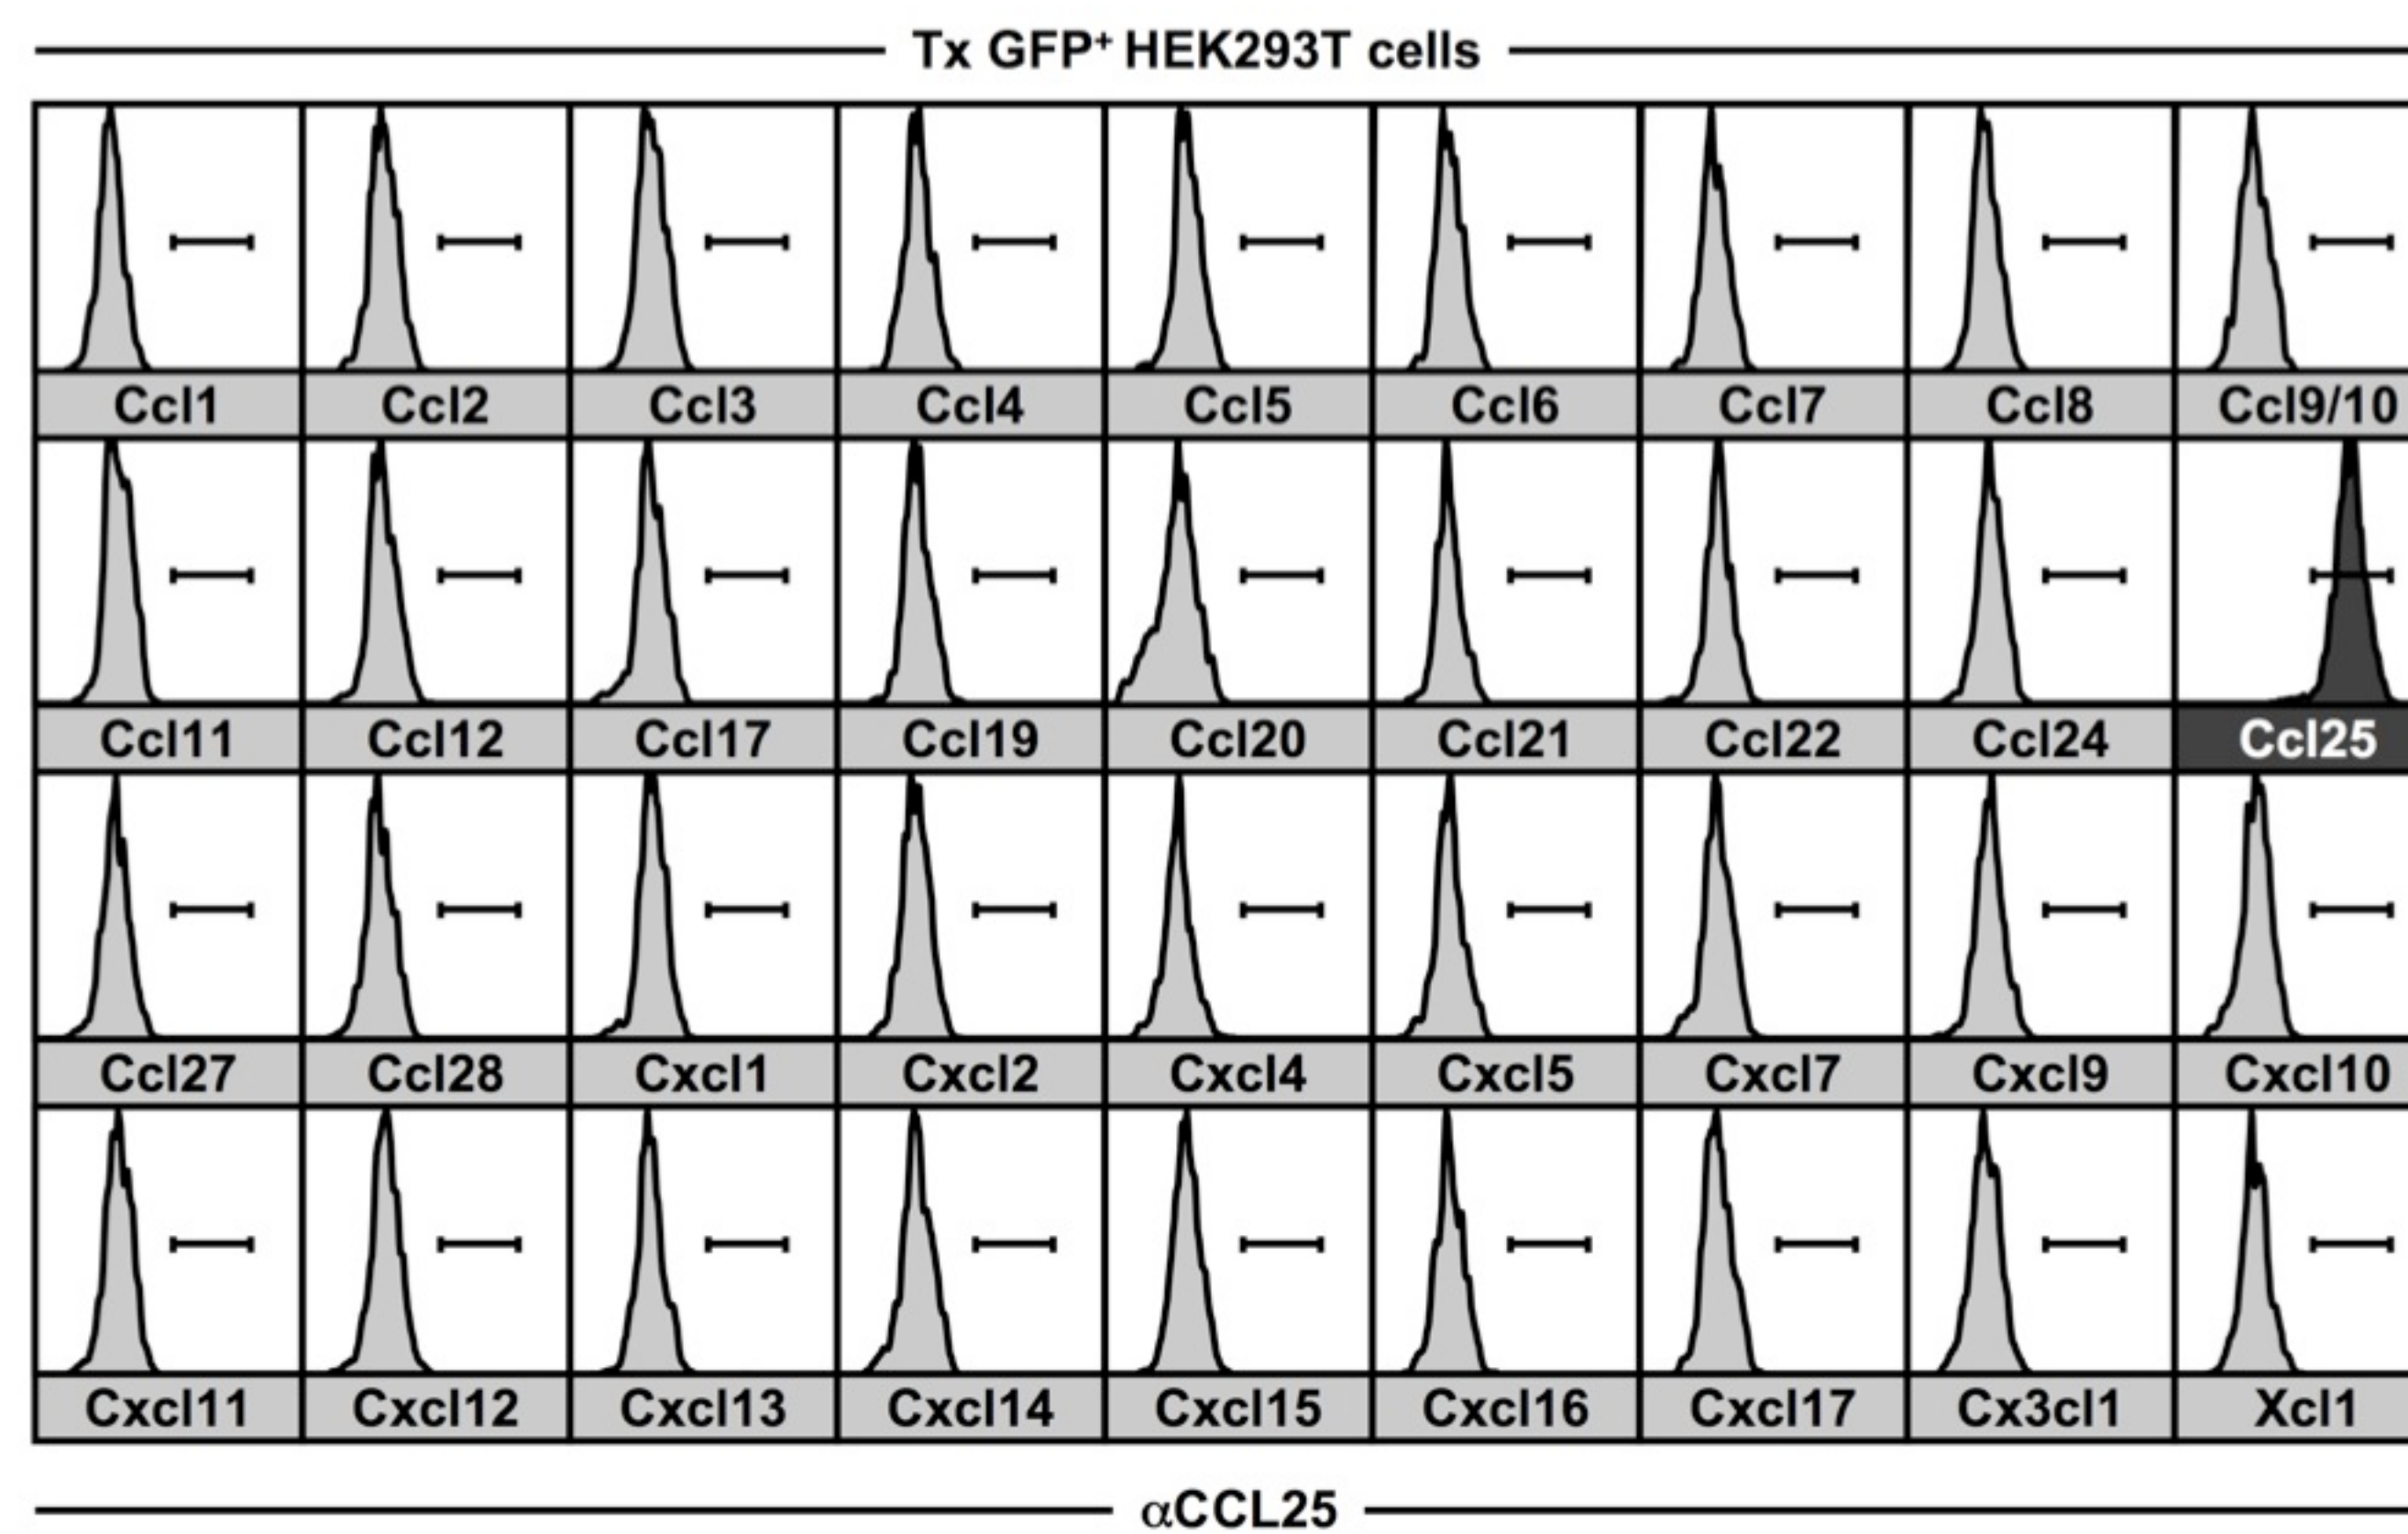

C.3 ( $\alpha$ CCL27)

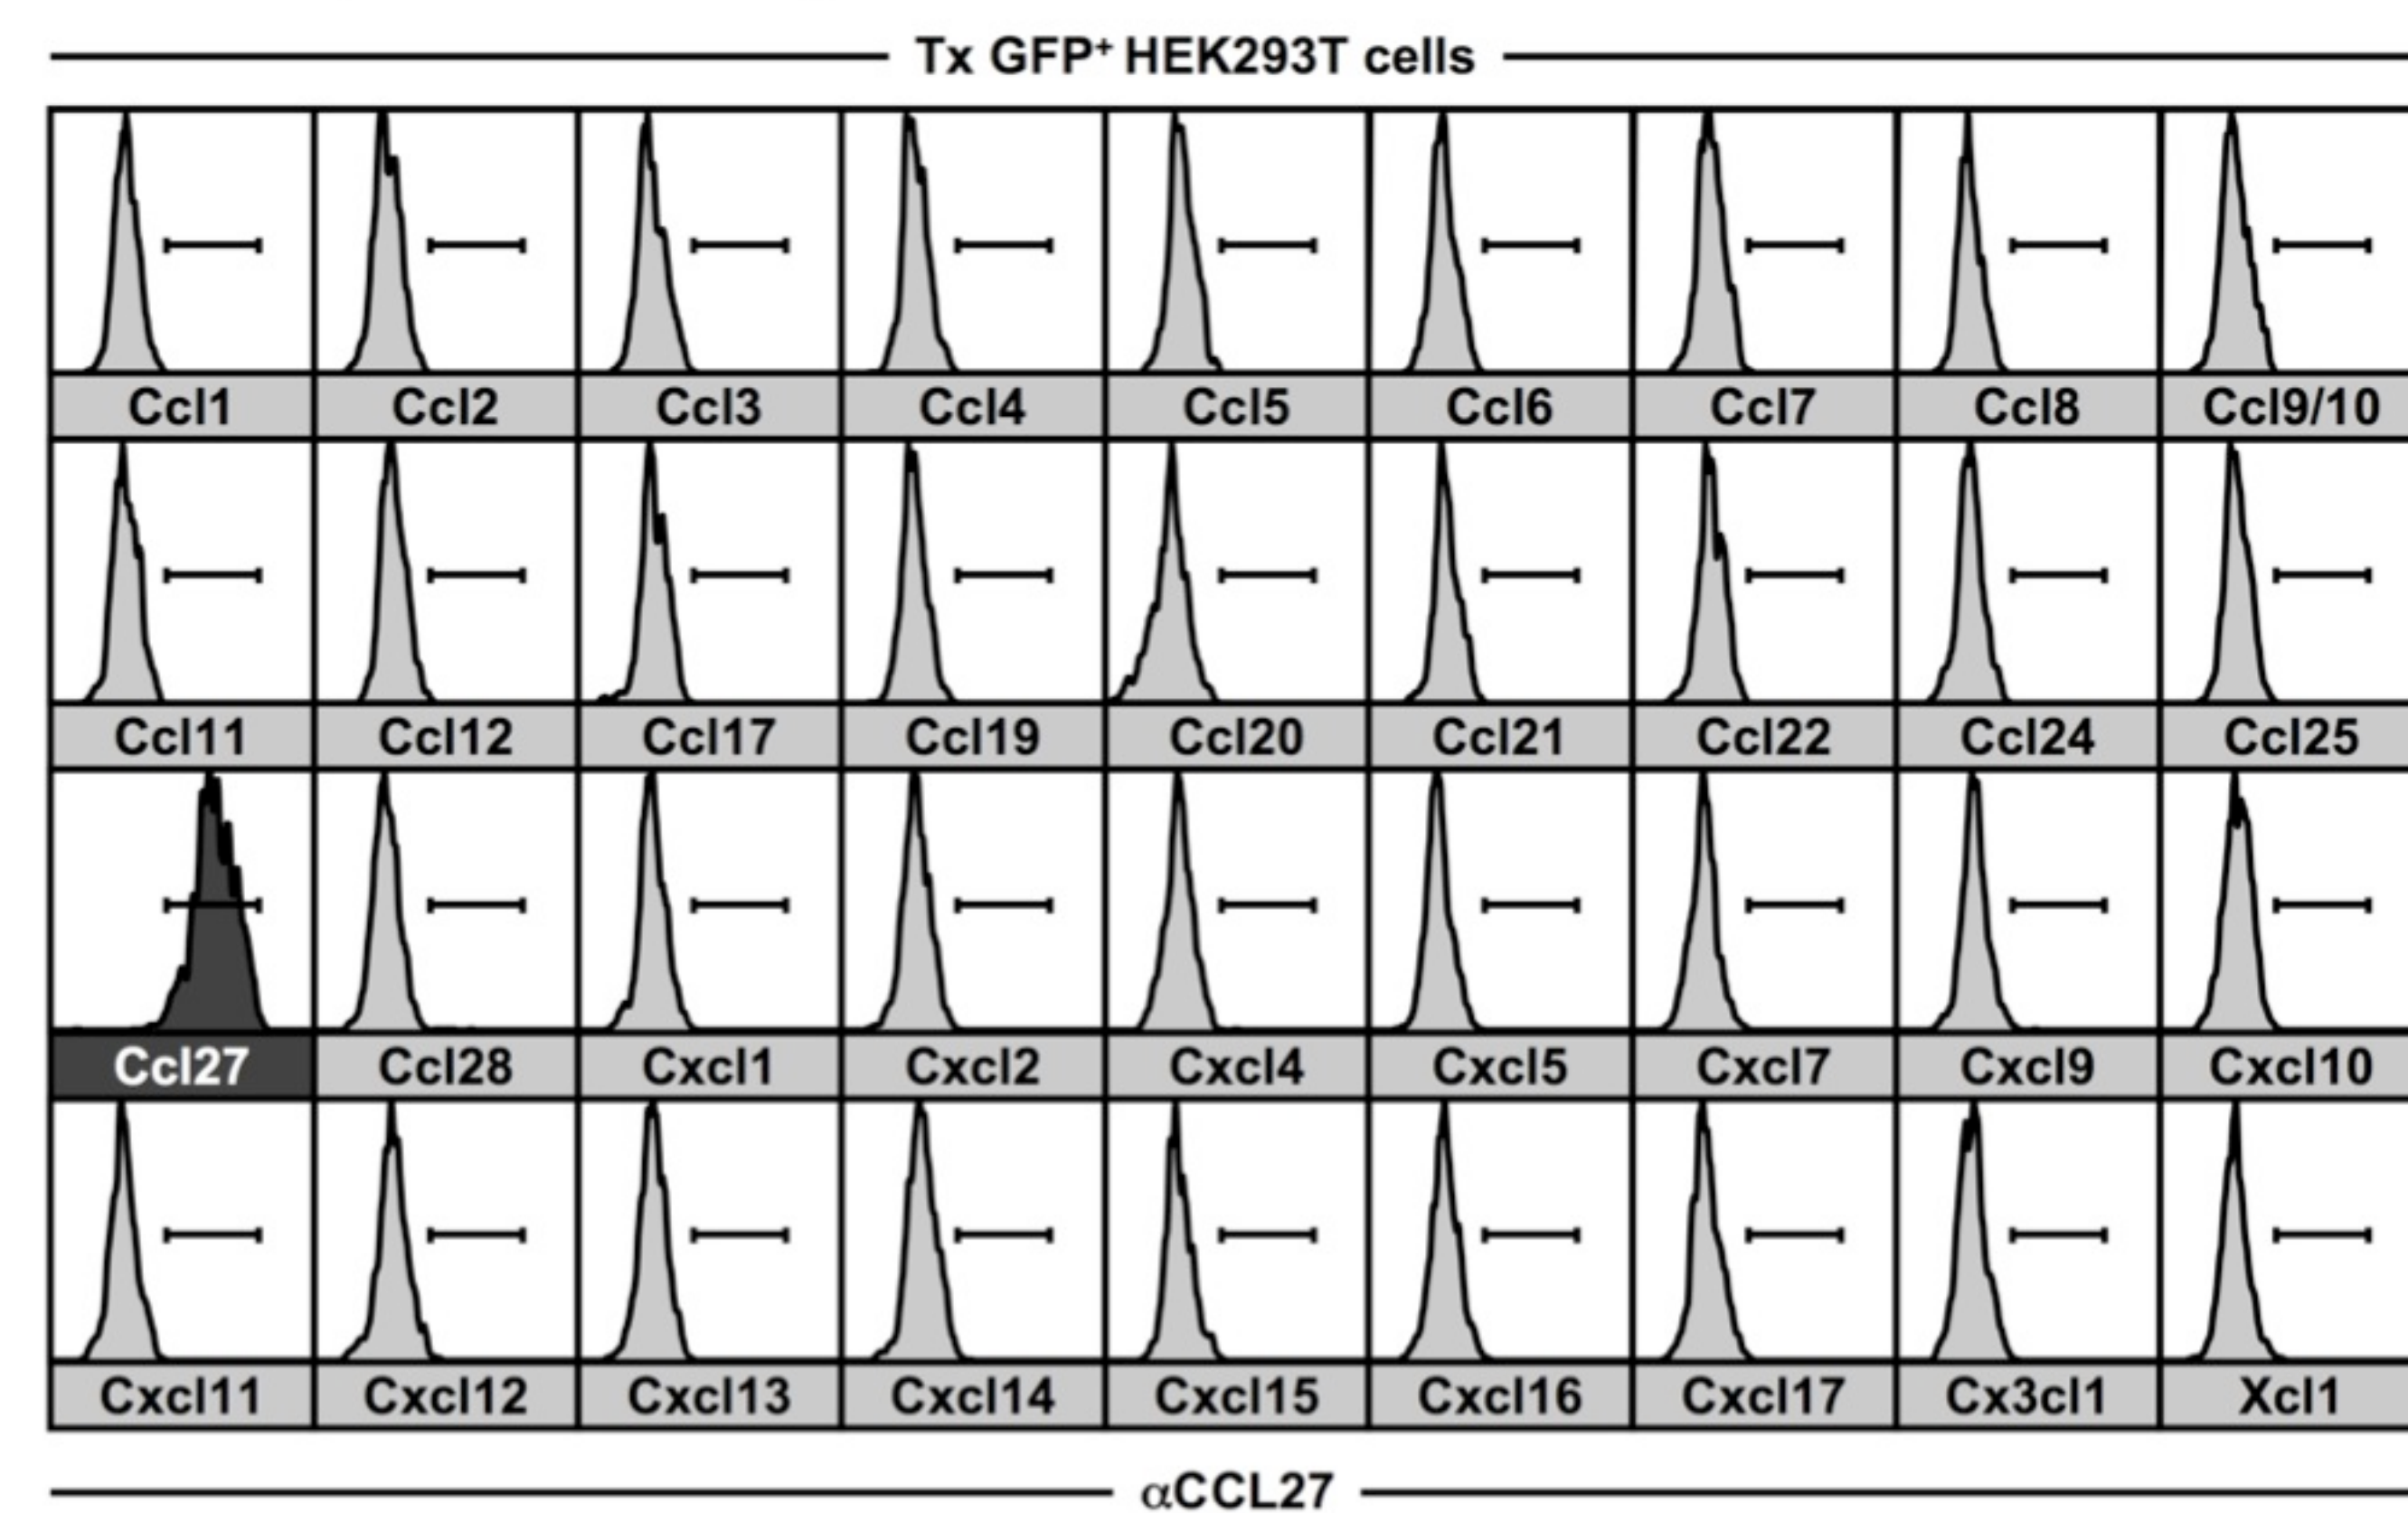

C.4 ( $\alpha$ CCL28)

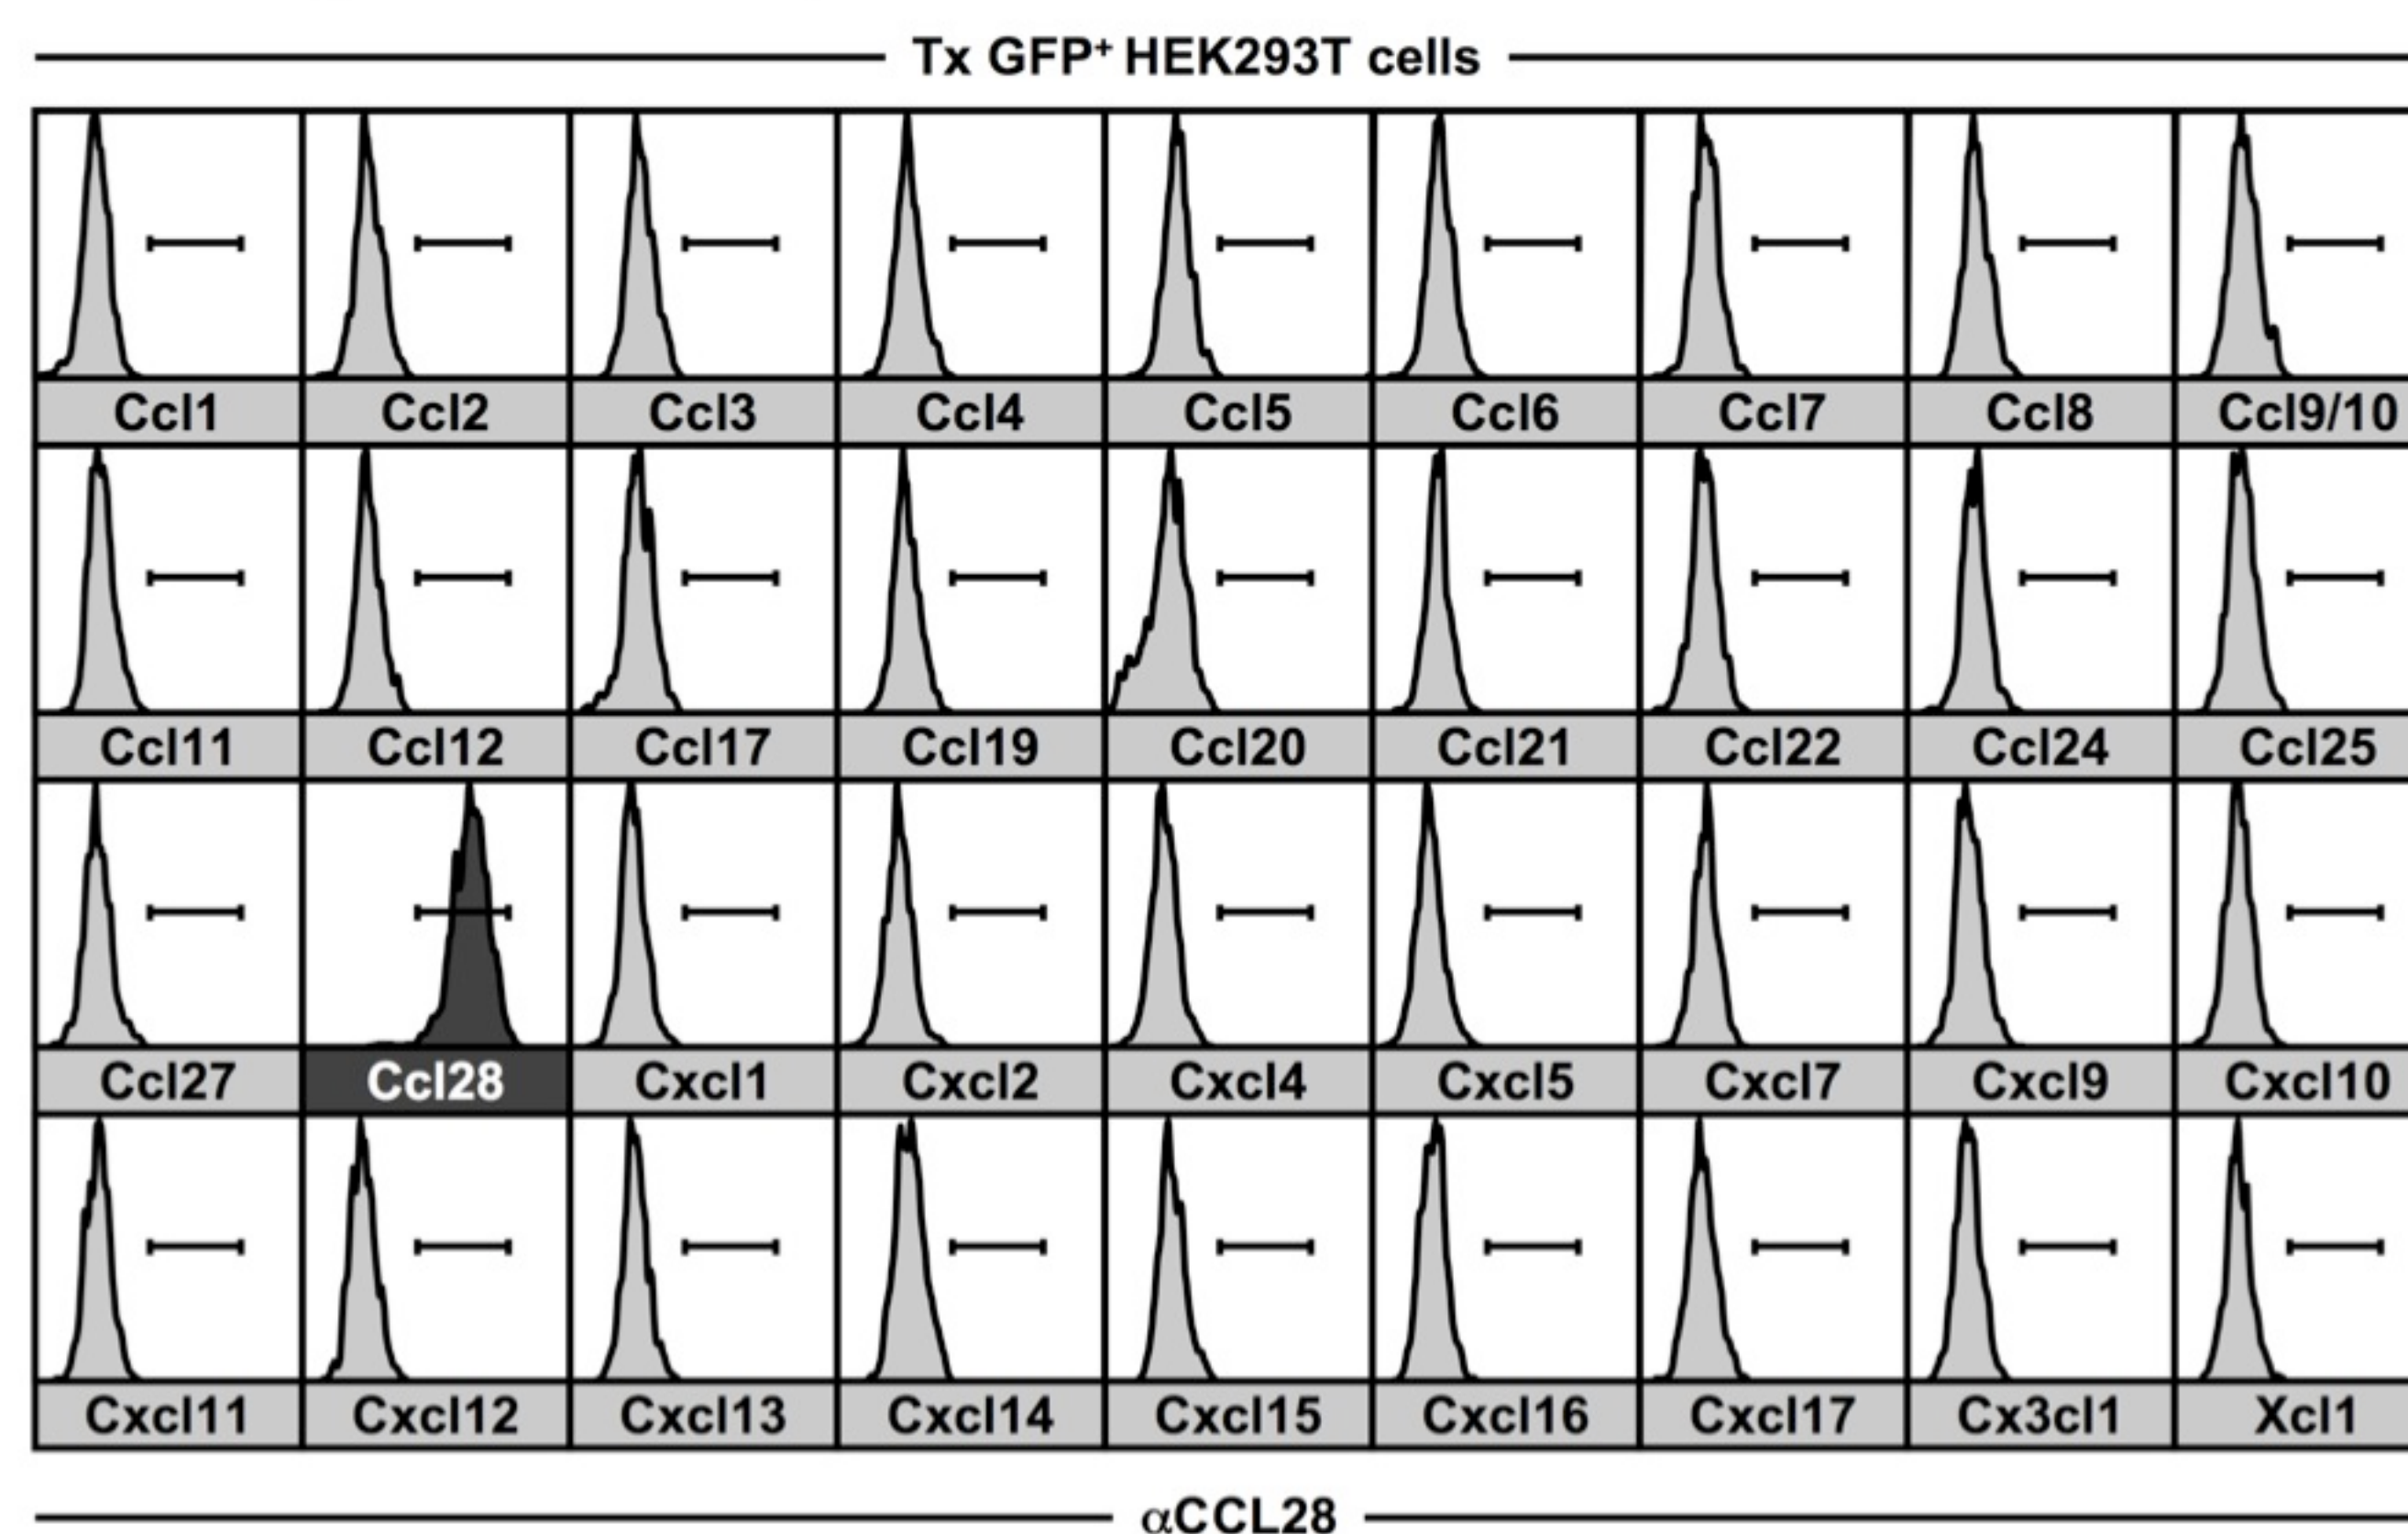

C.5 ( $\alpha$ CXCL1)

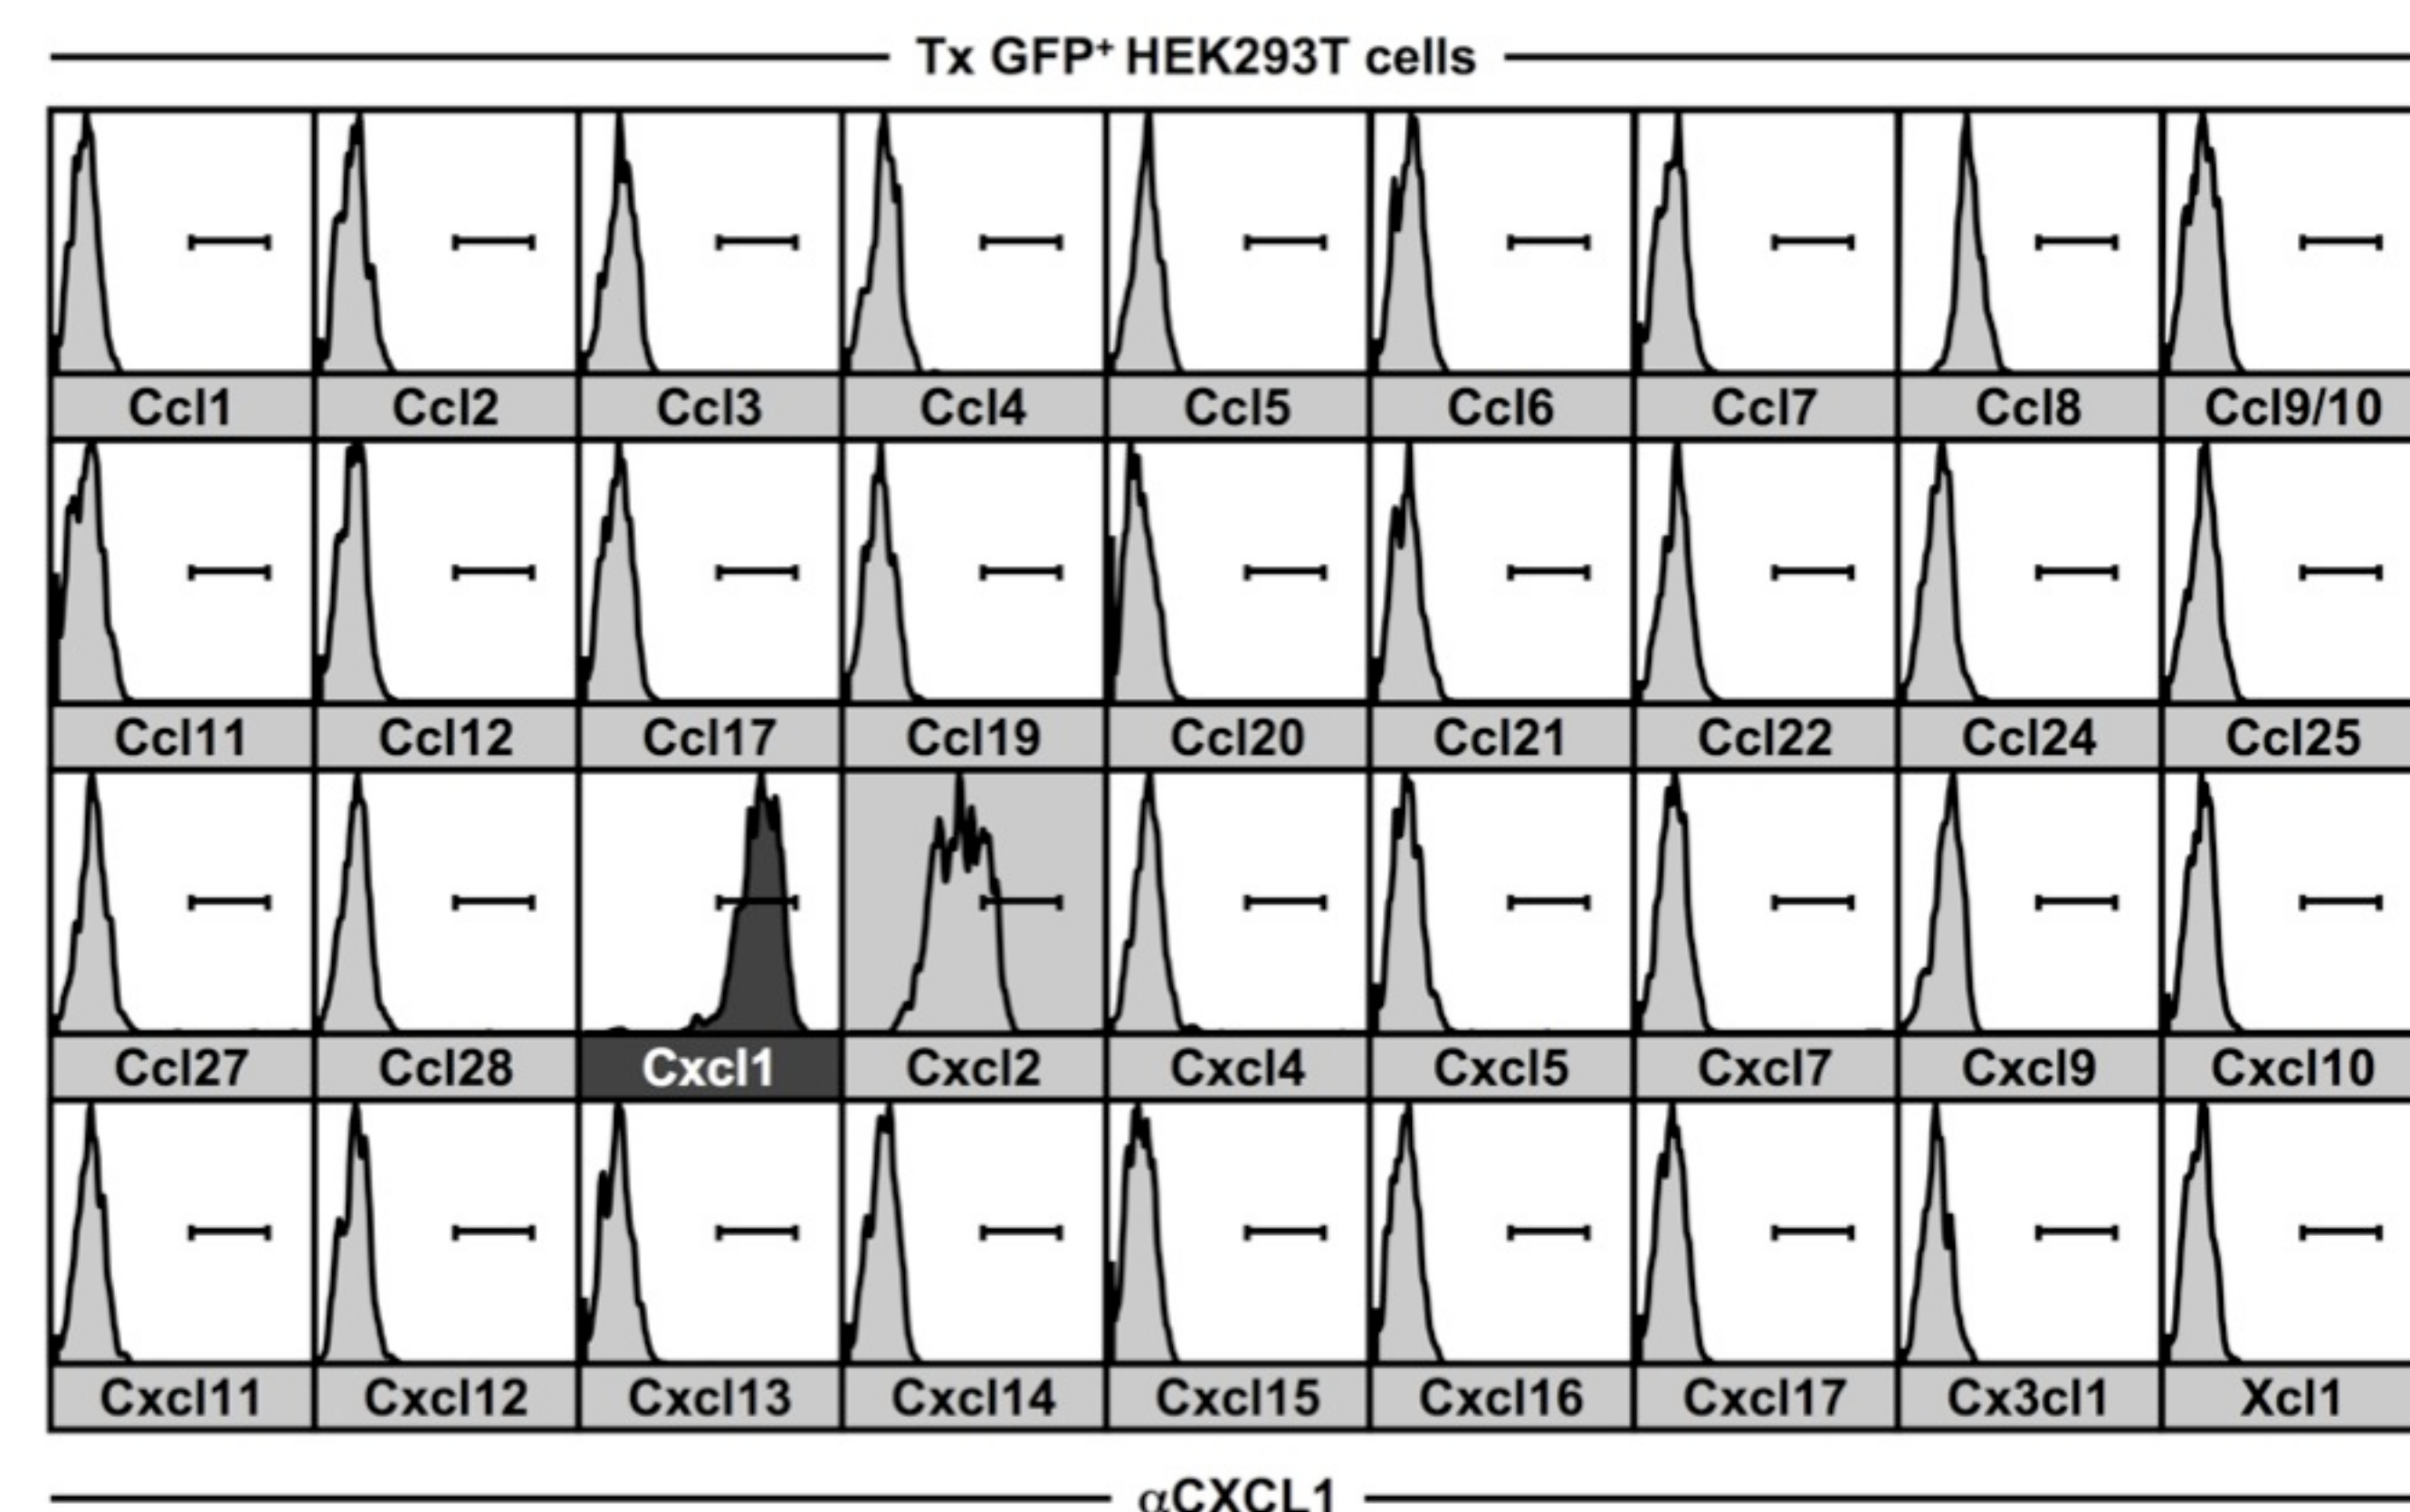

C.6 ( $\alpha$ CXCL2)

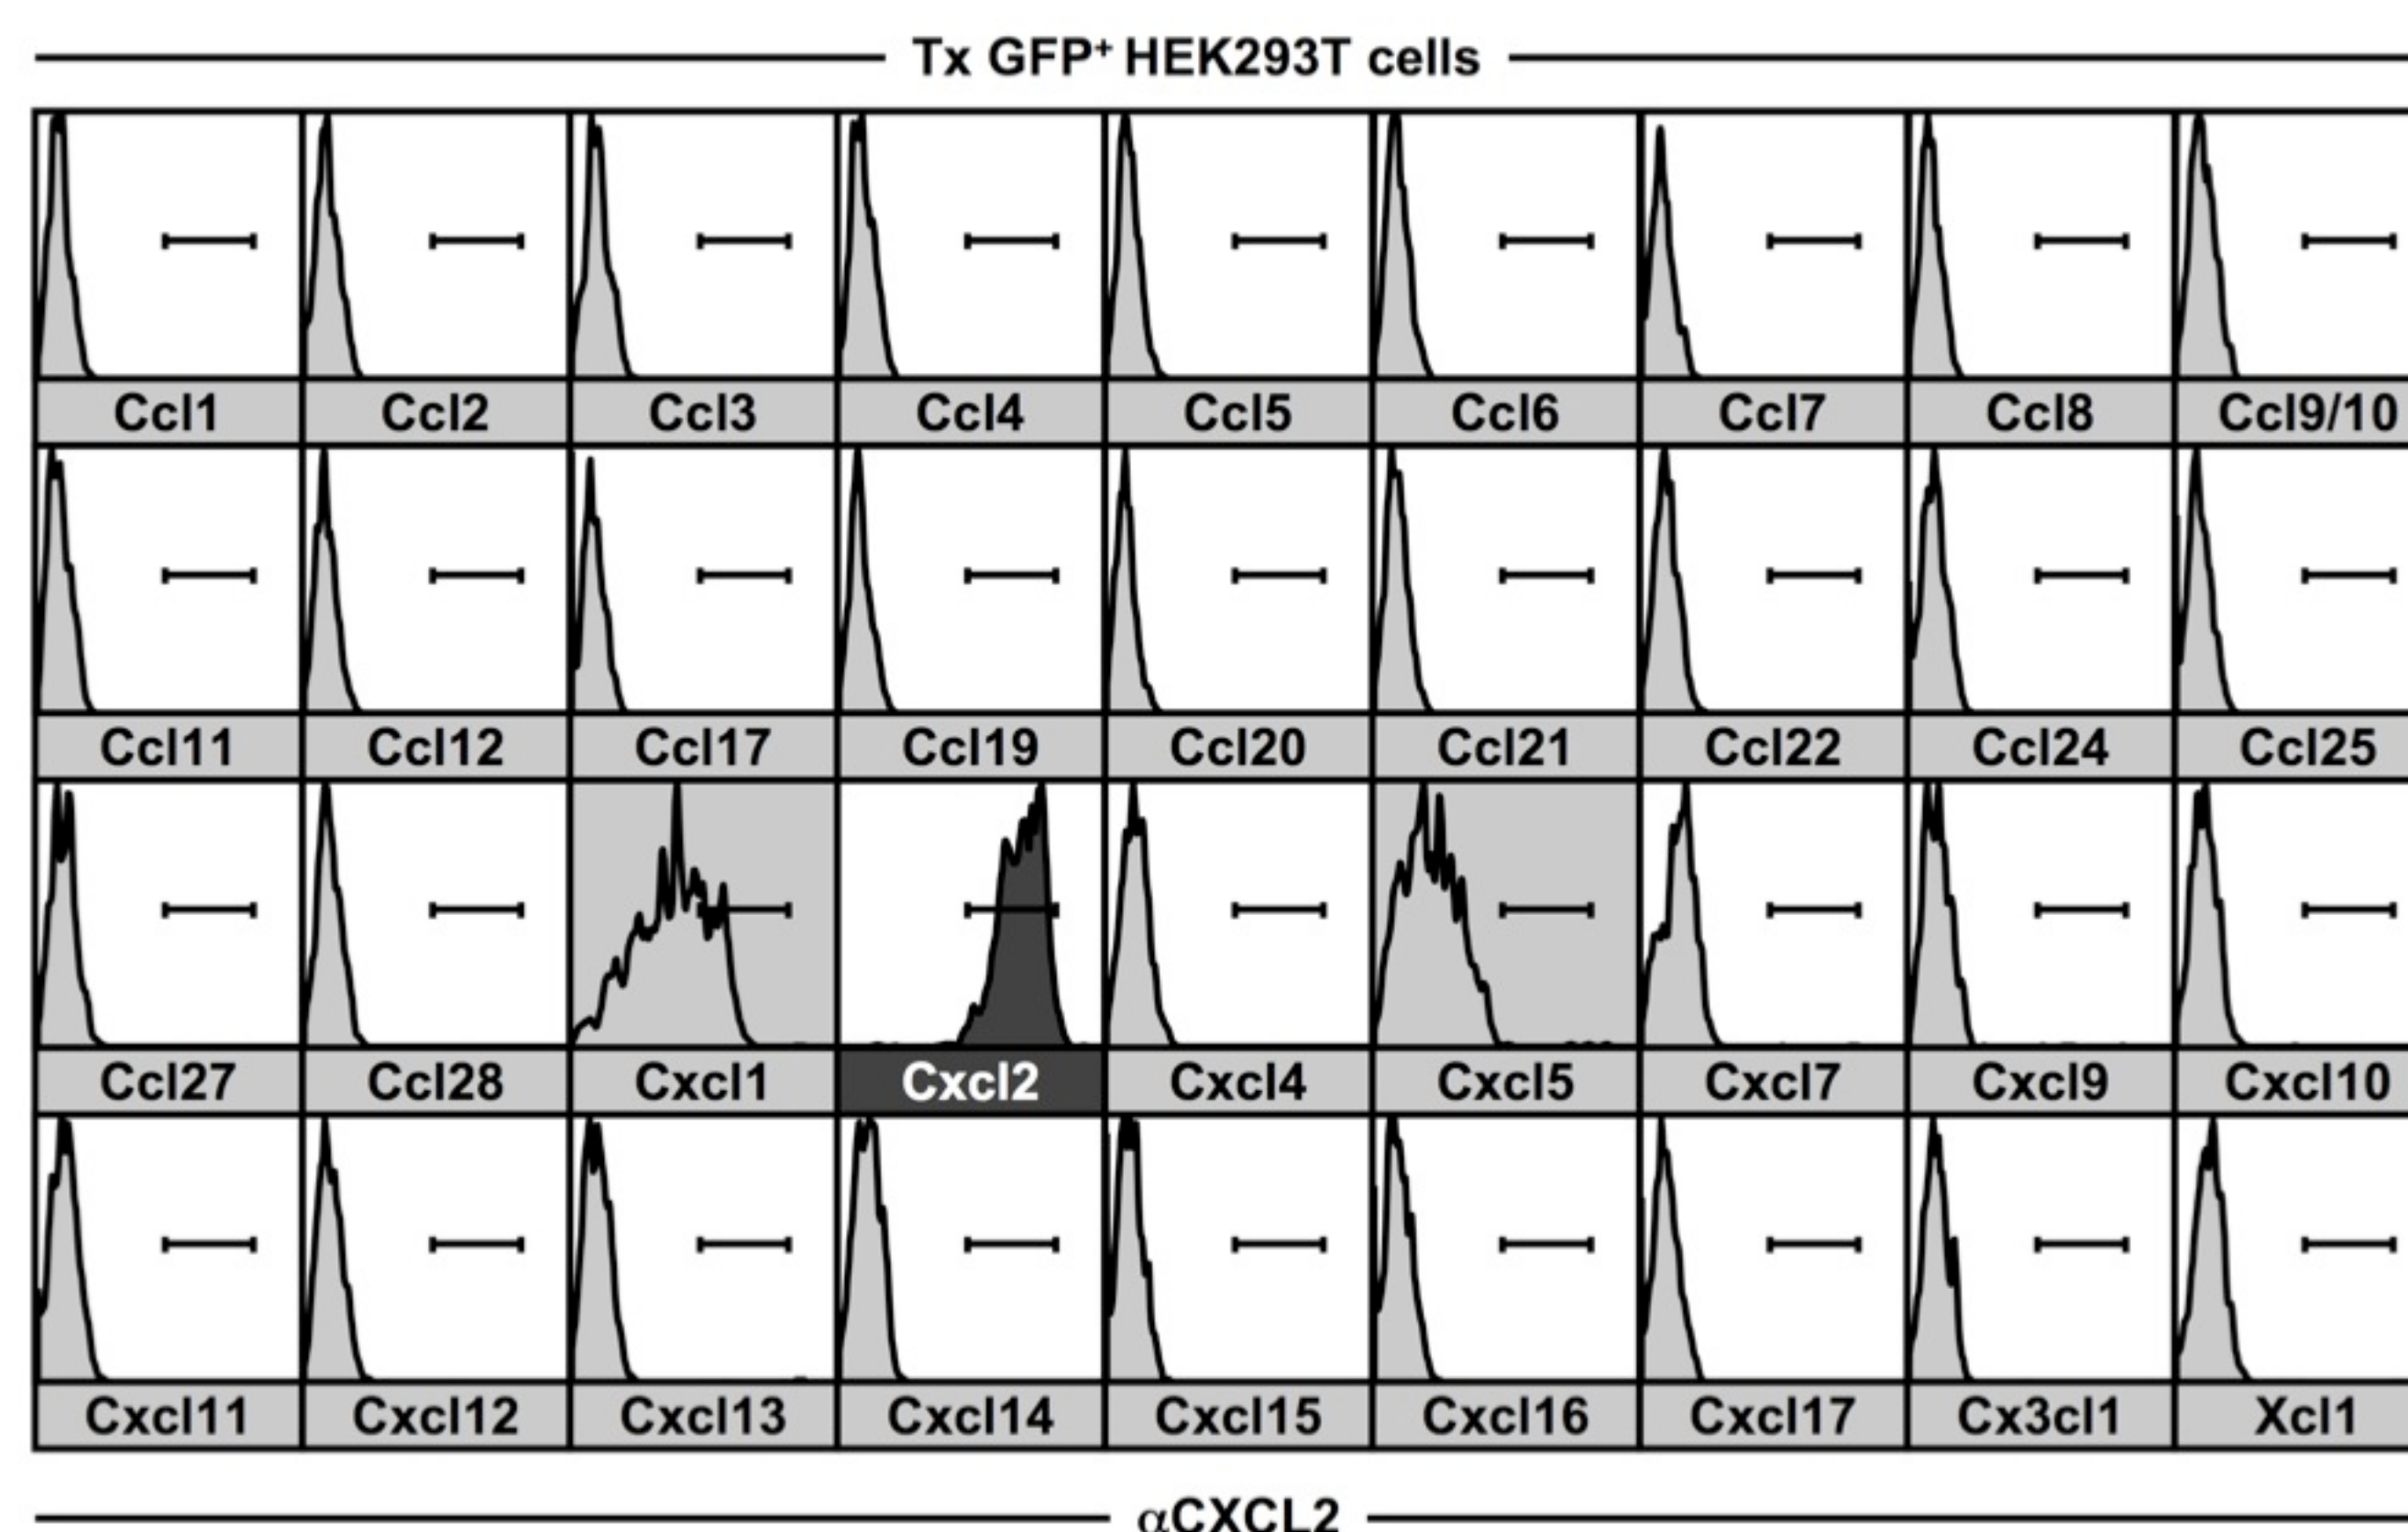

C.7 ( $\alpha$ CXCL4)

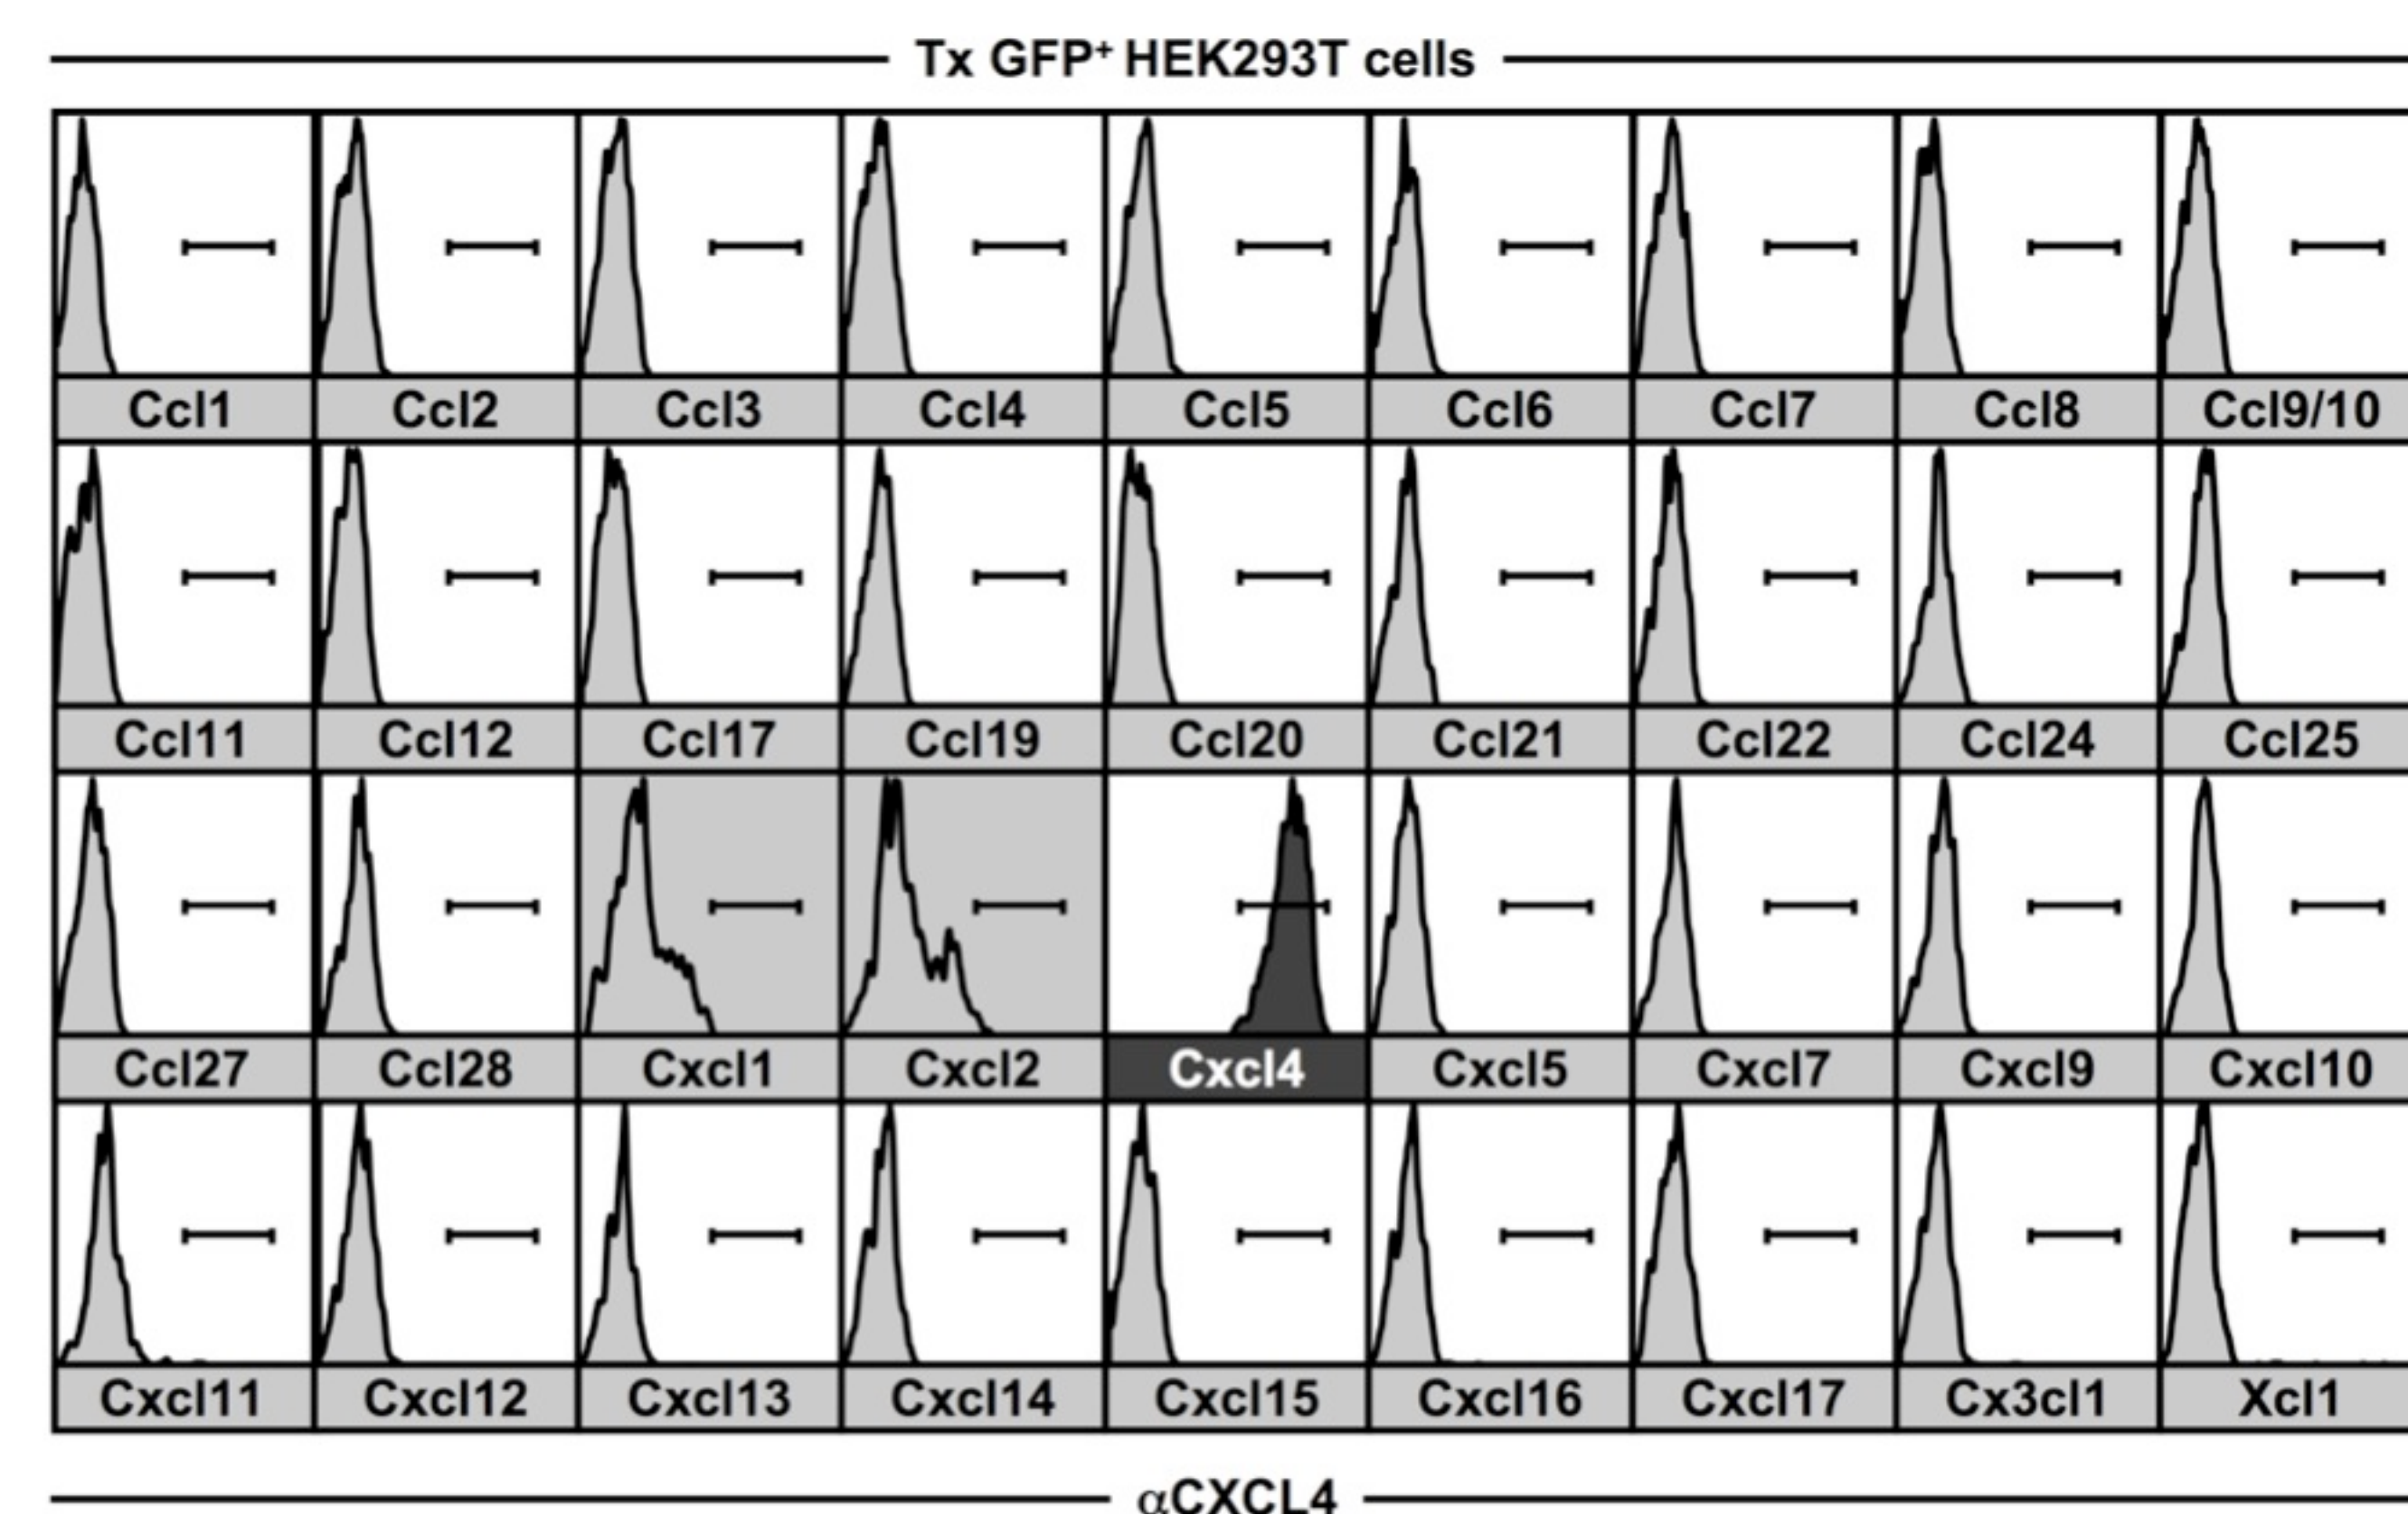

C.8 ( $\alpha$ CXCL5)

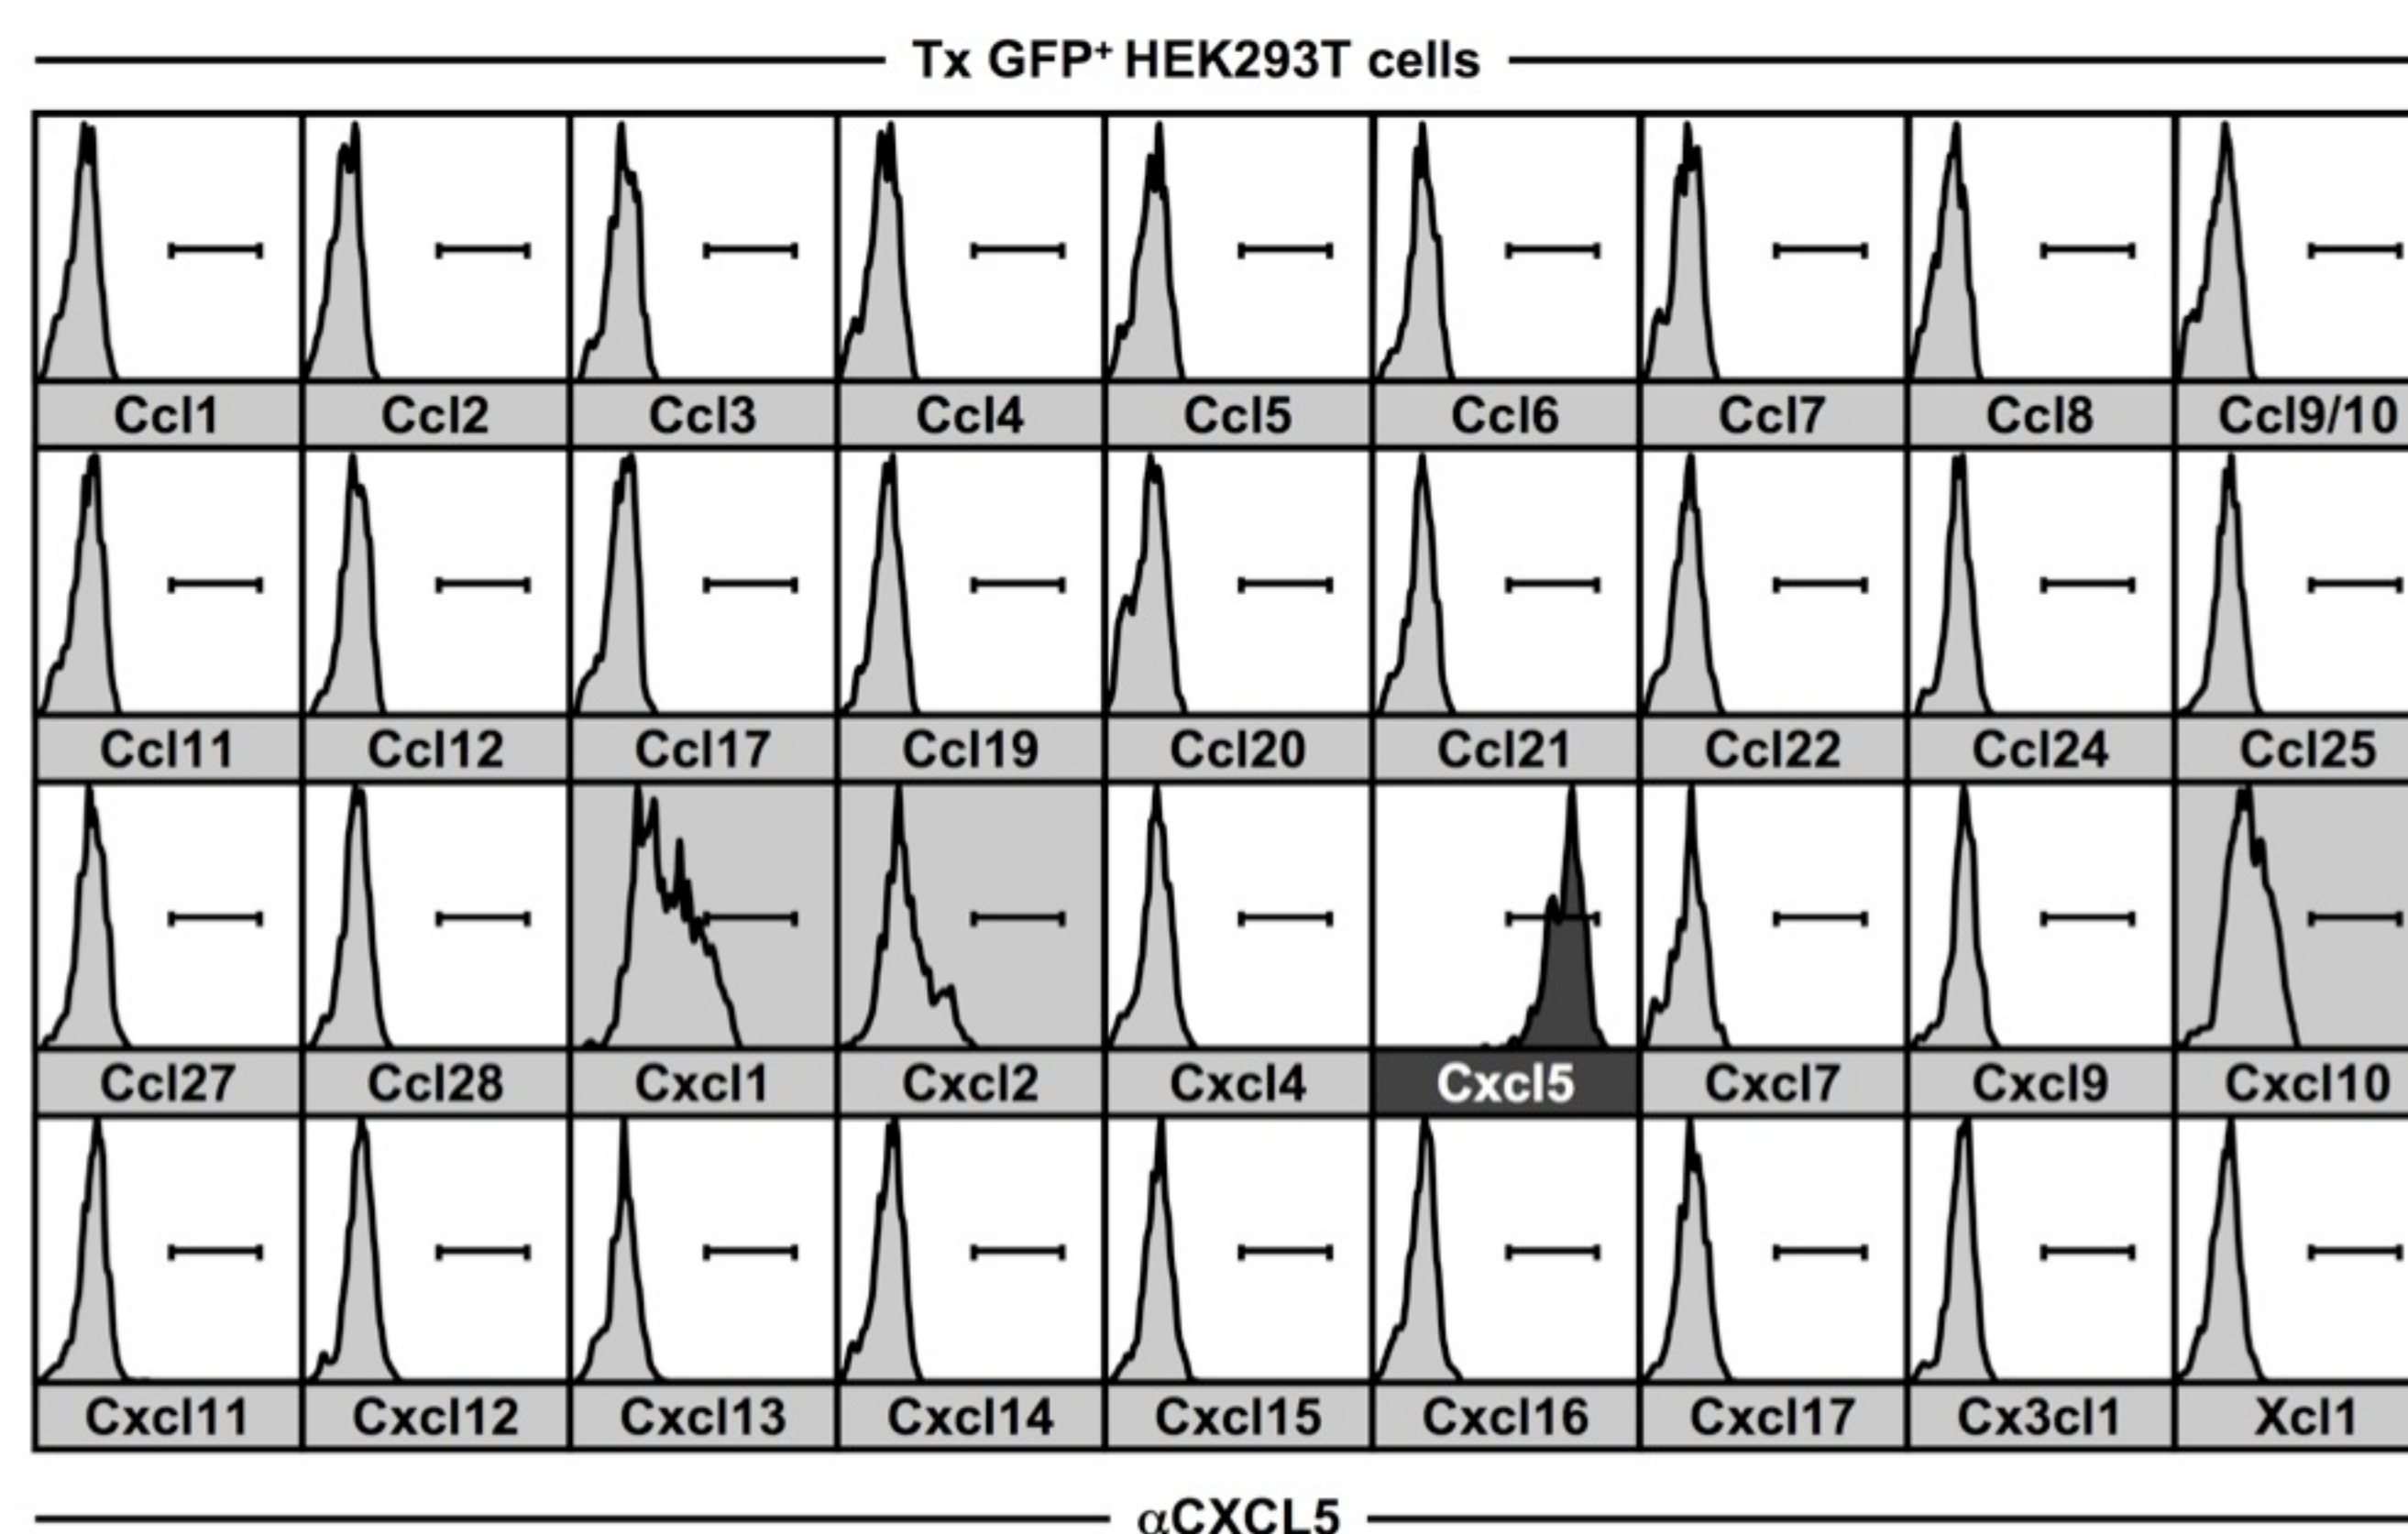

## D.1 ( $\alpha$ CXCL7)

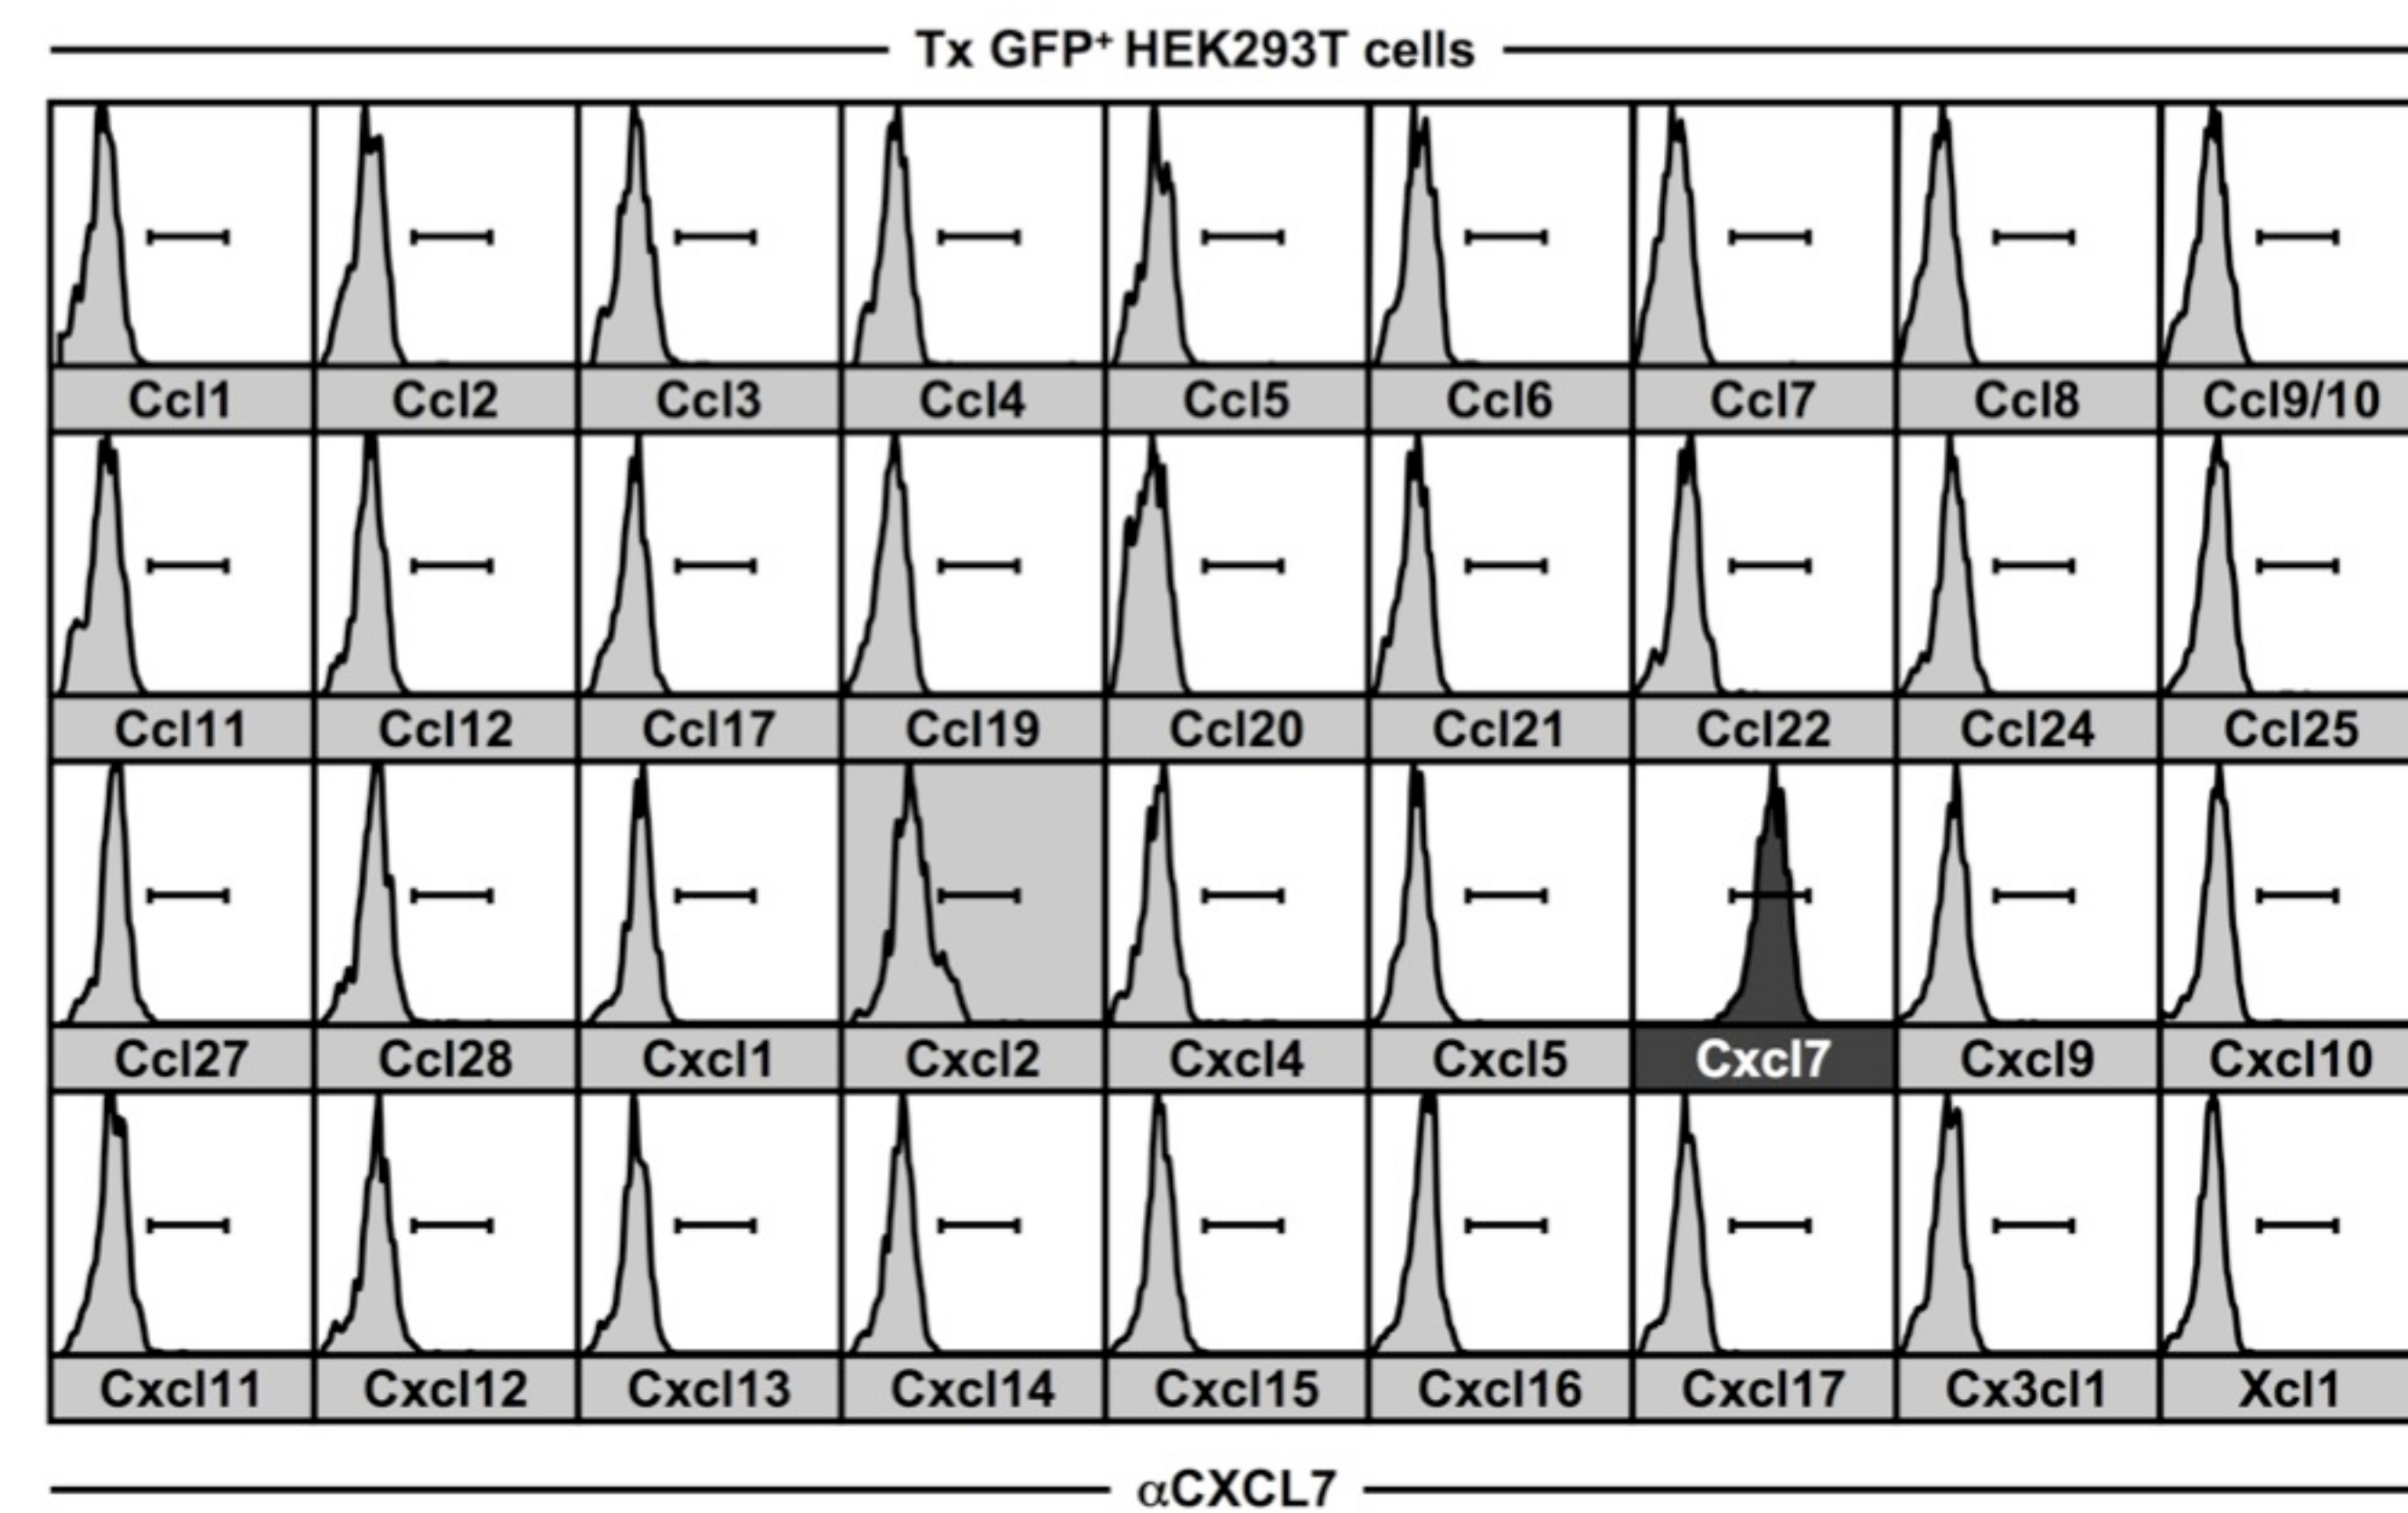

## D.2 ( $\alpha$ CXCL9)

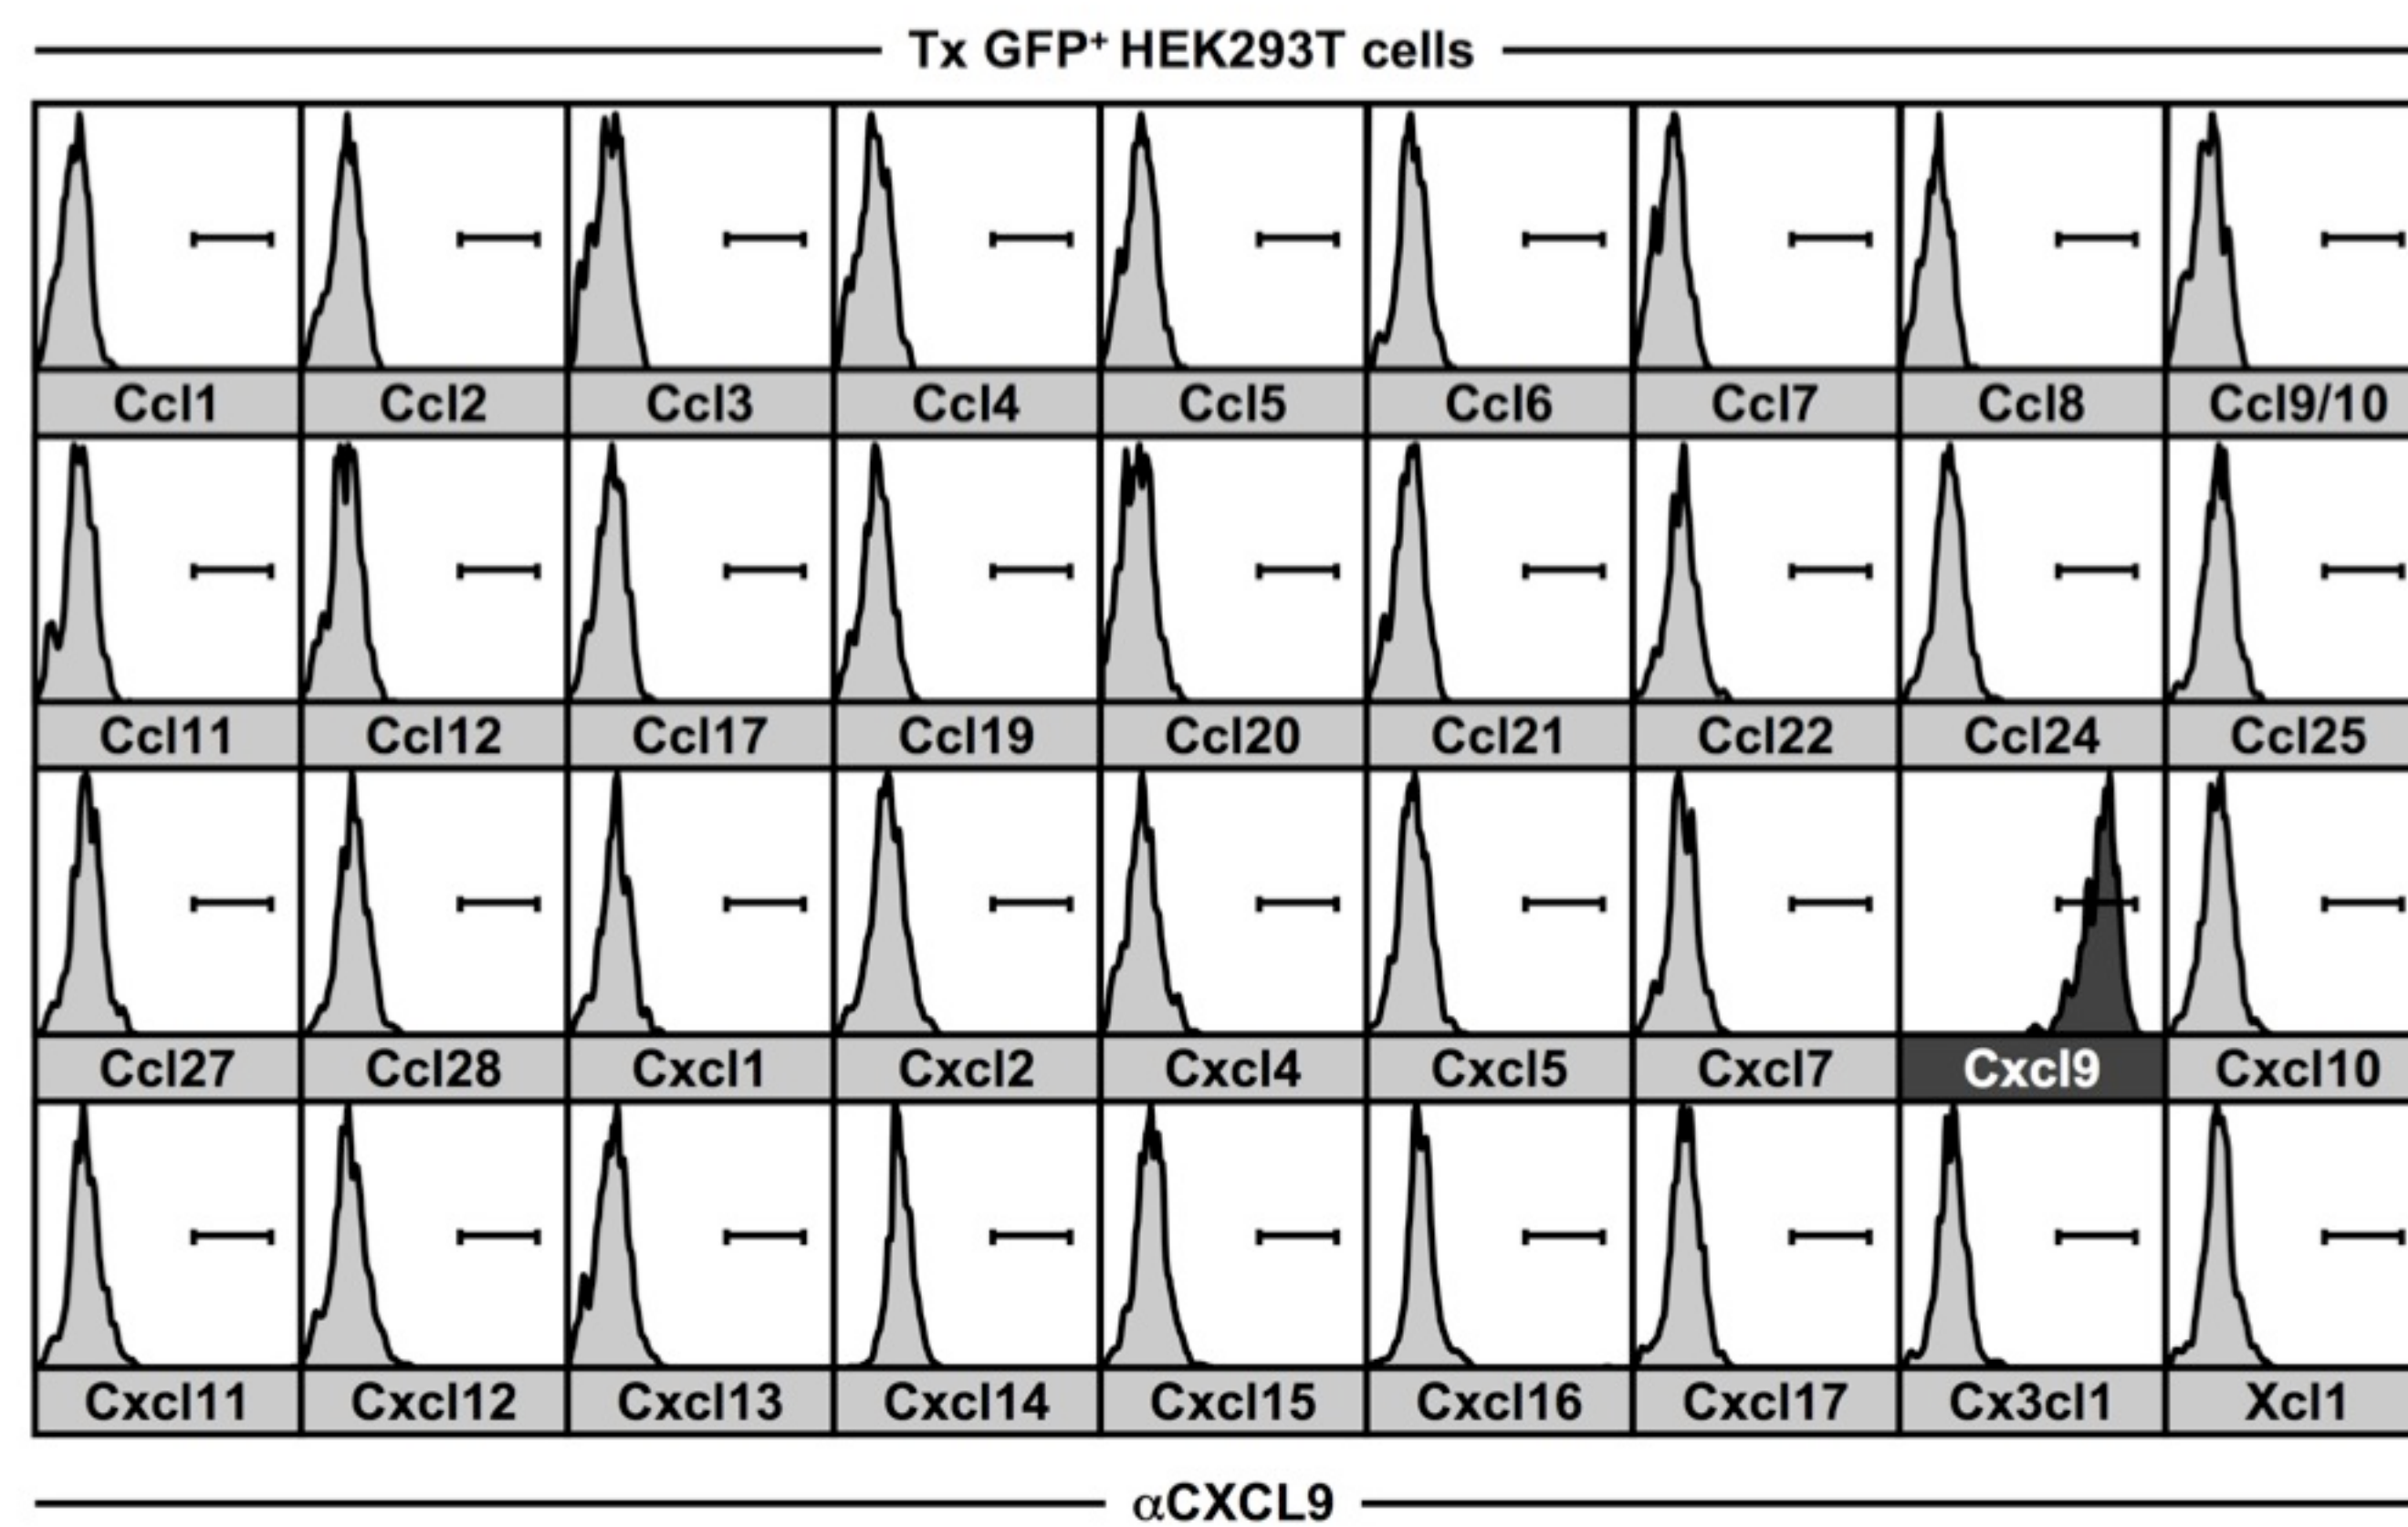

## D.3 ( $\alpha$ CXCL10)

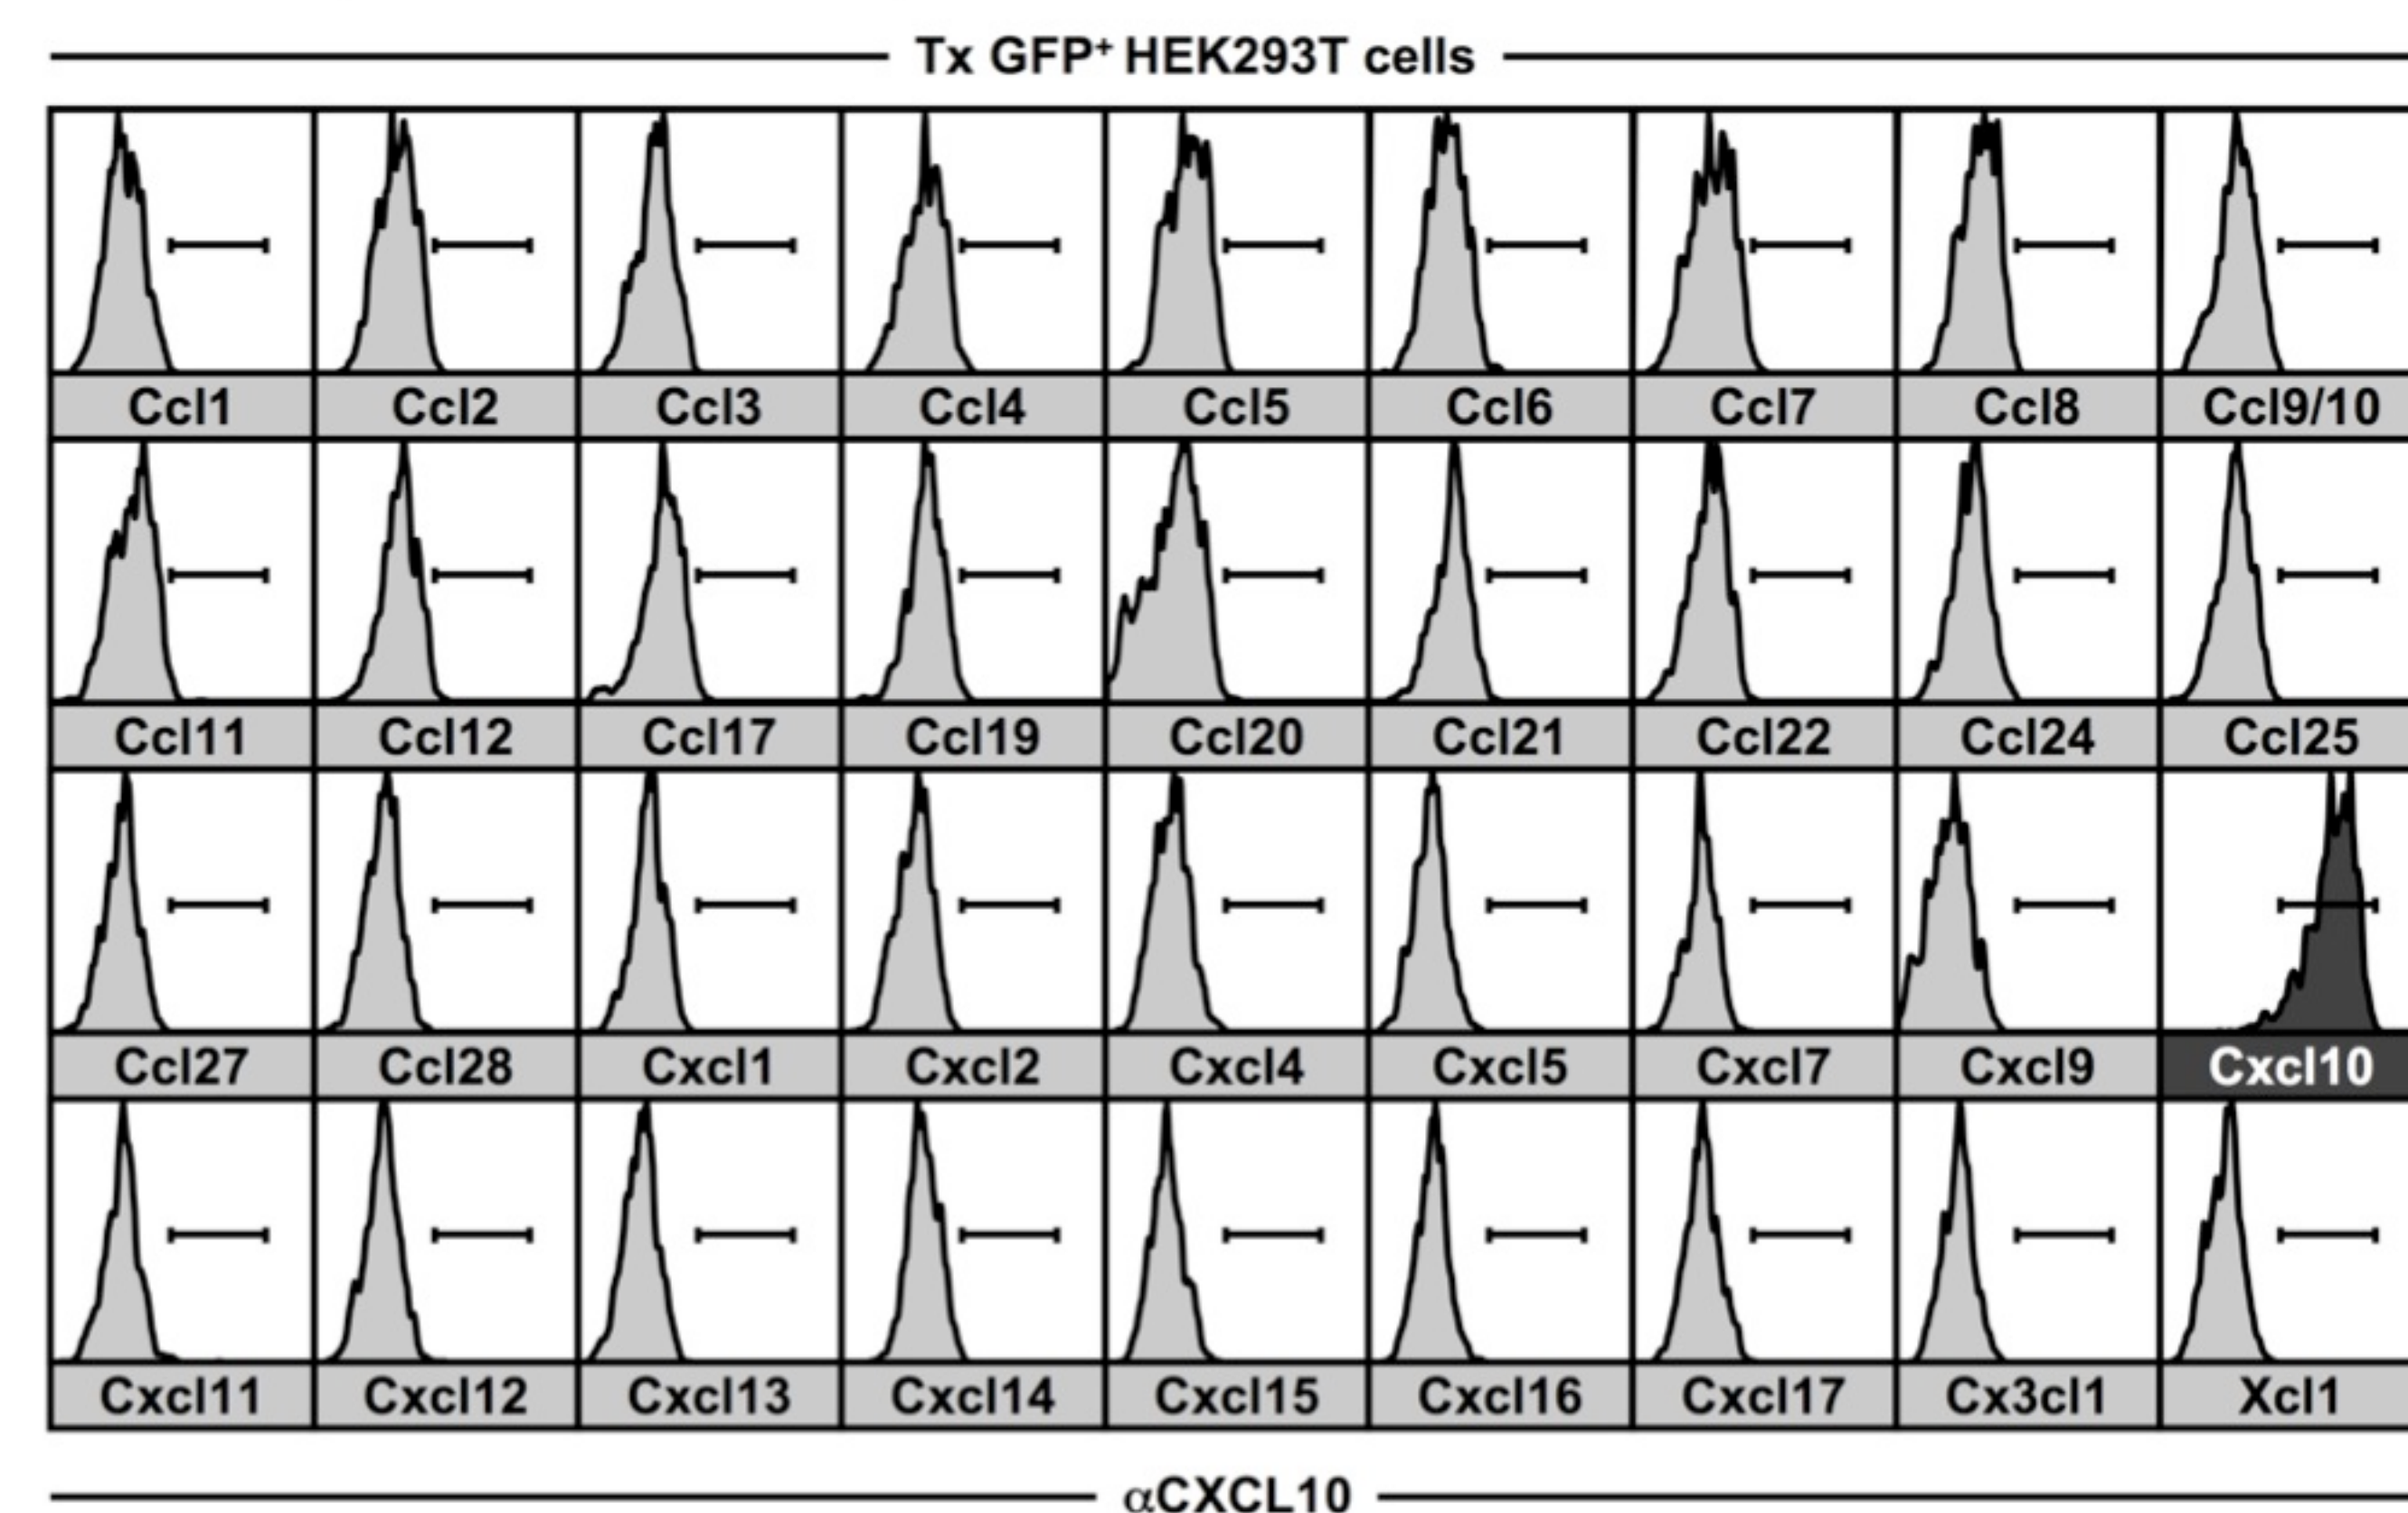

## D.4 ( $\alpha$ CXCL11)

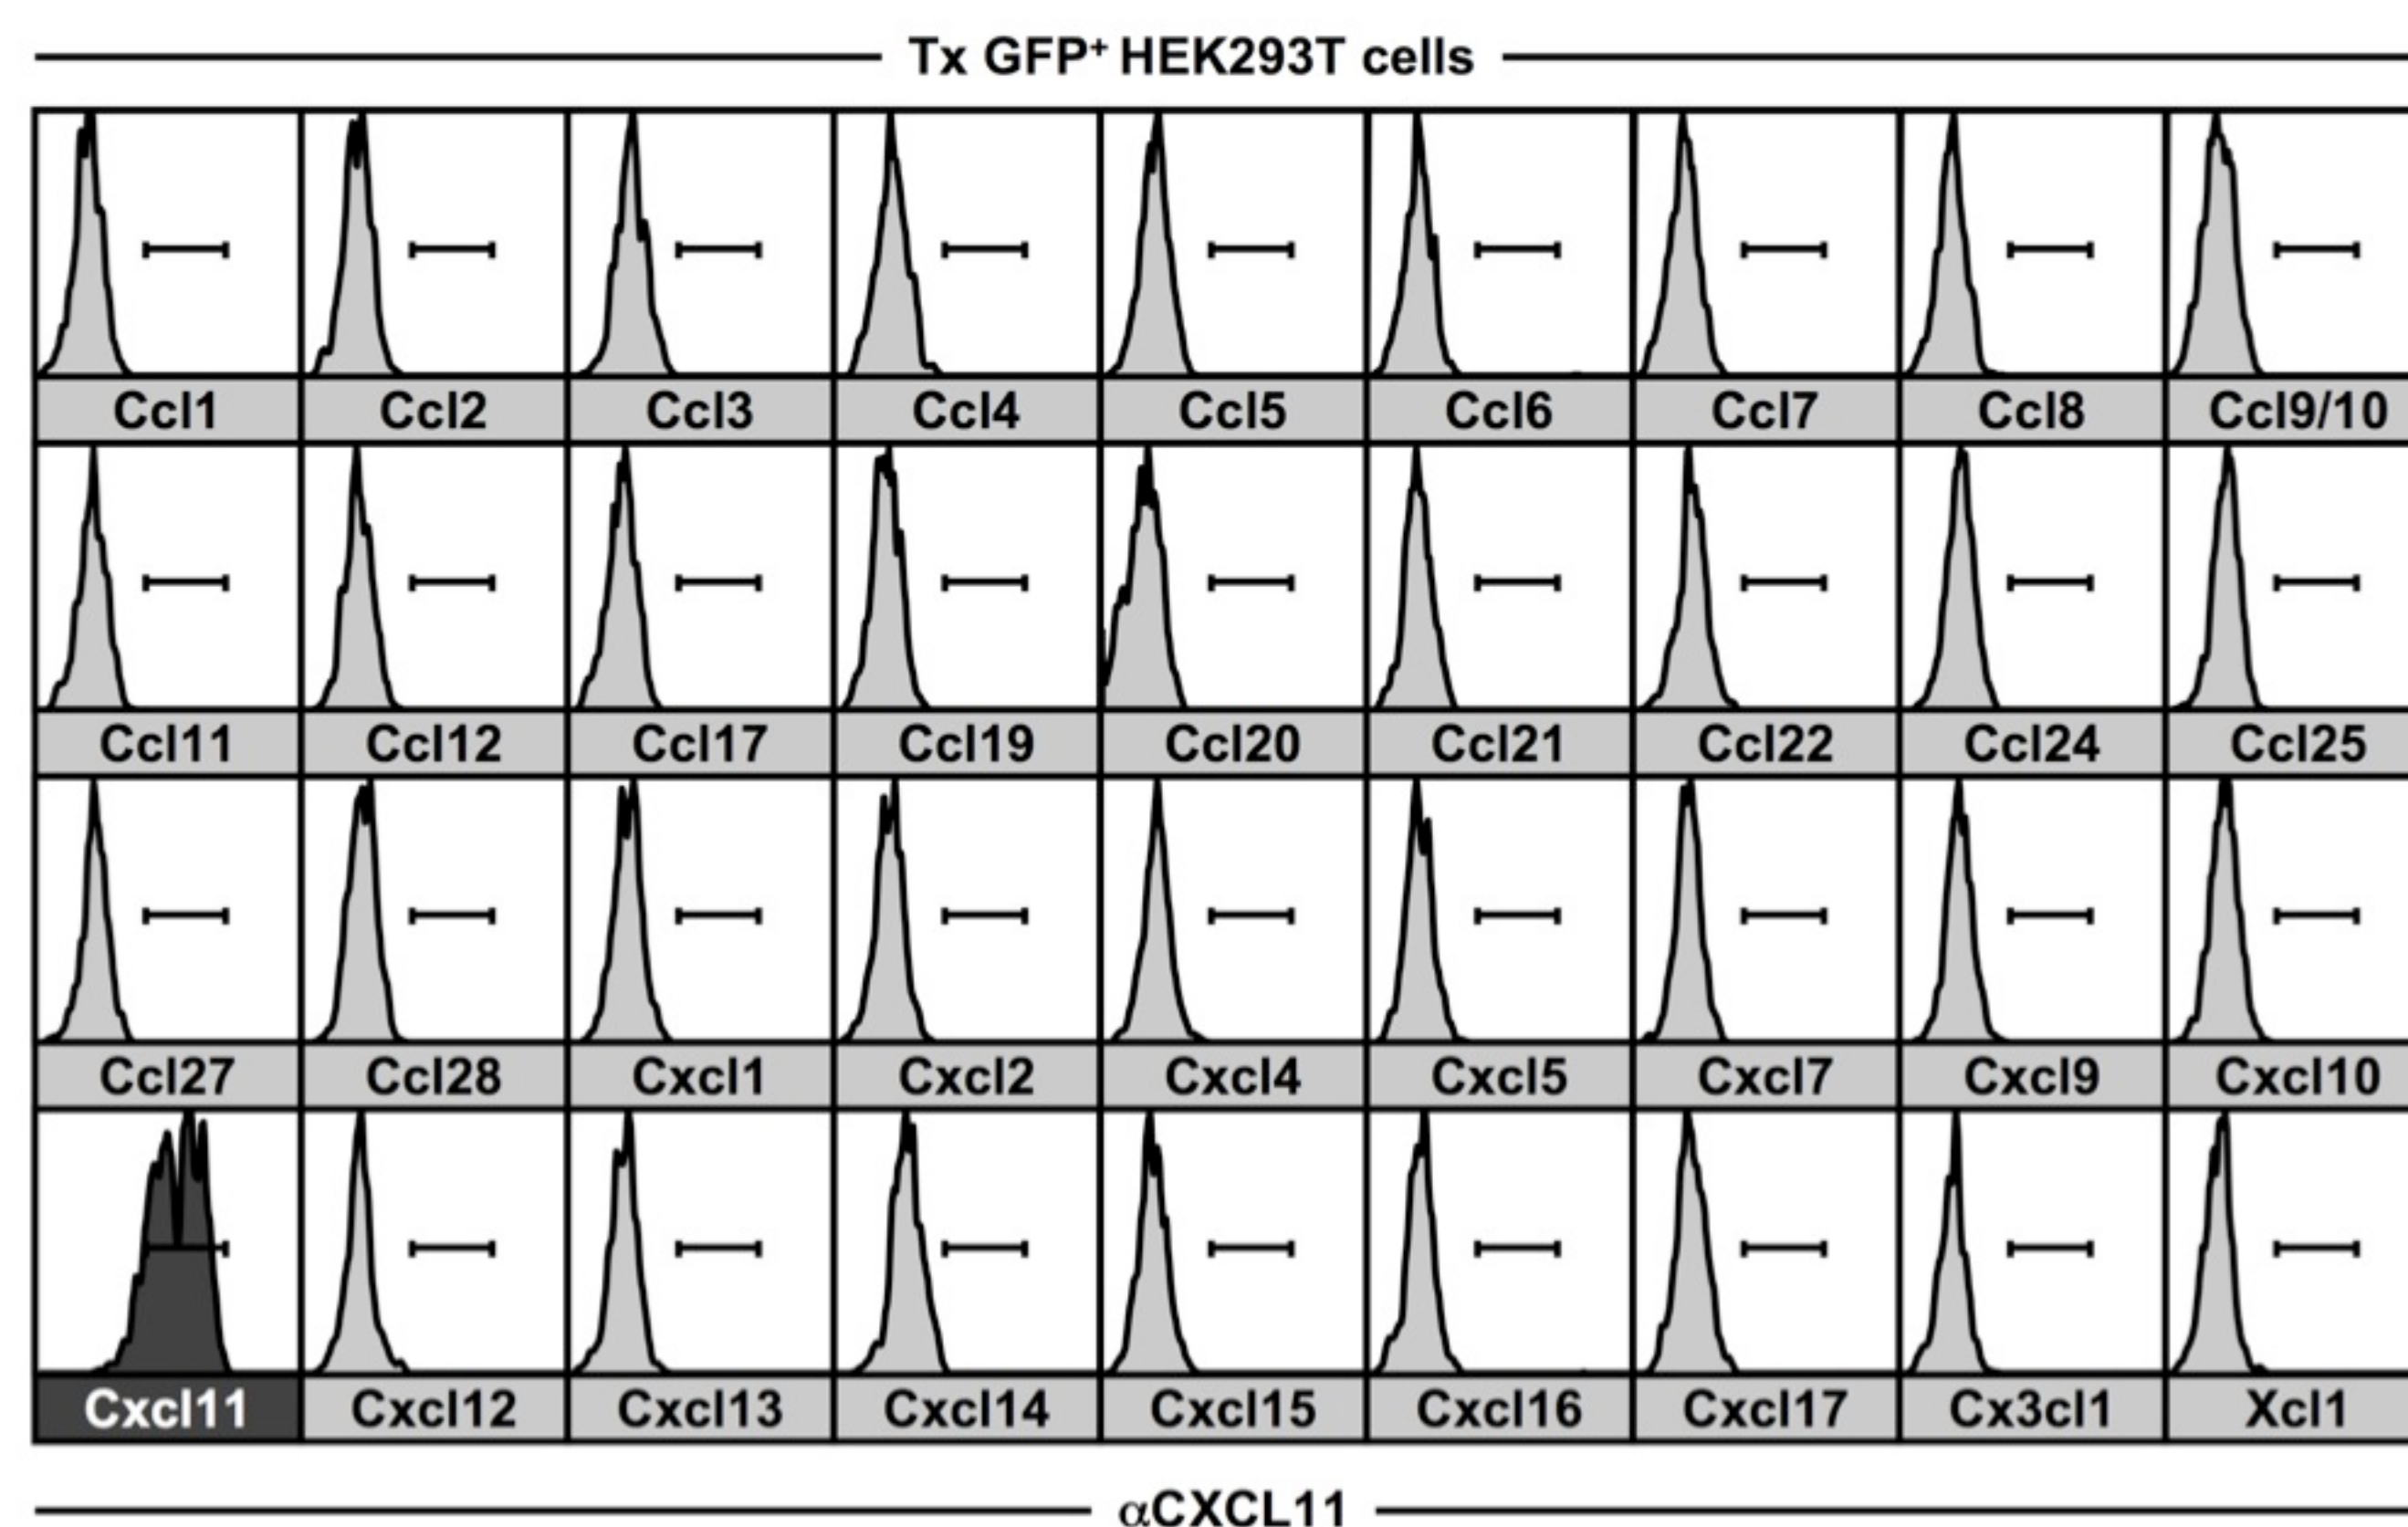

## D.5 ( $\alpha$ CXCL12)

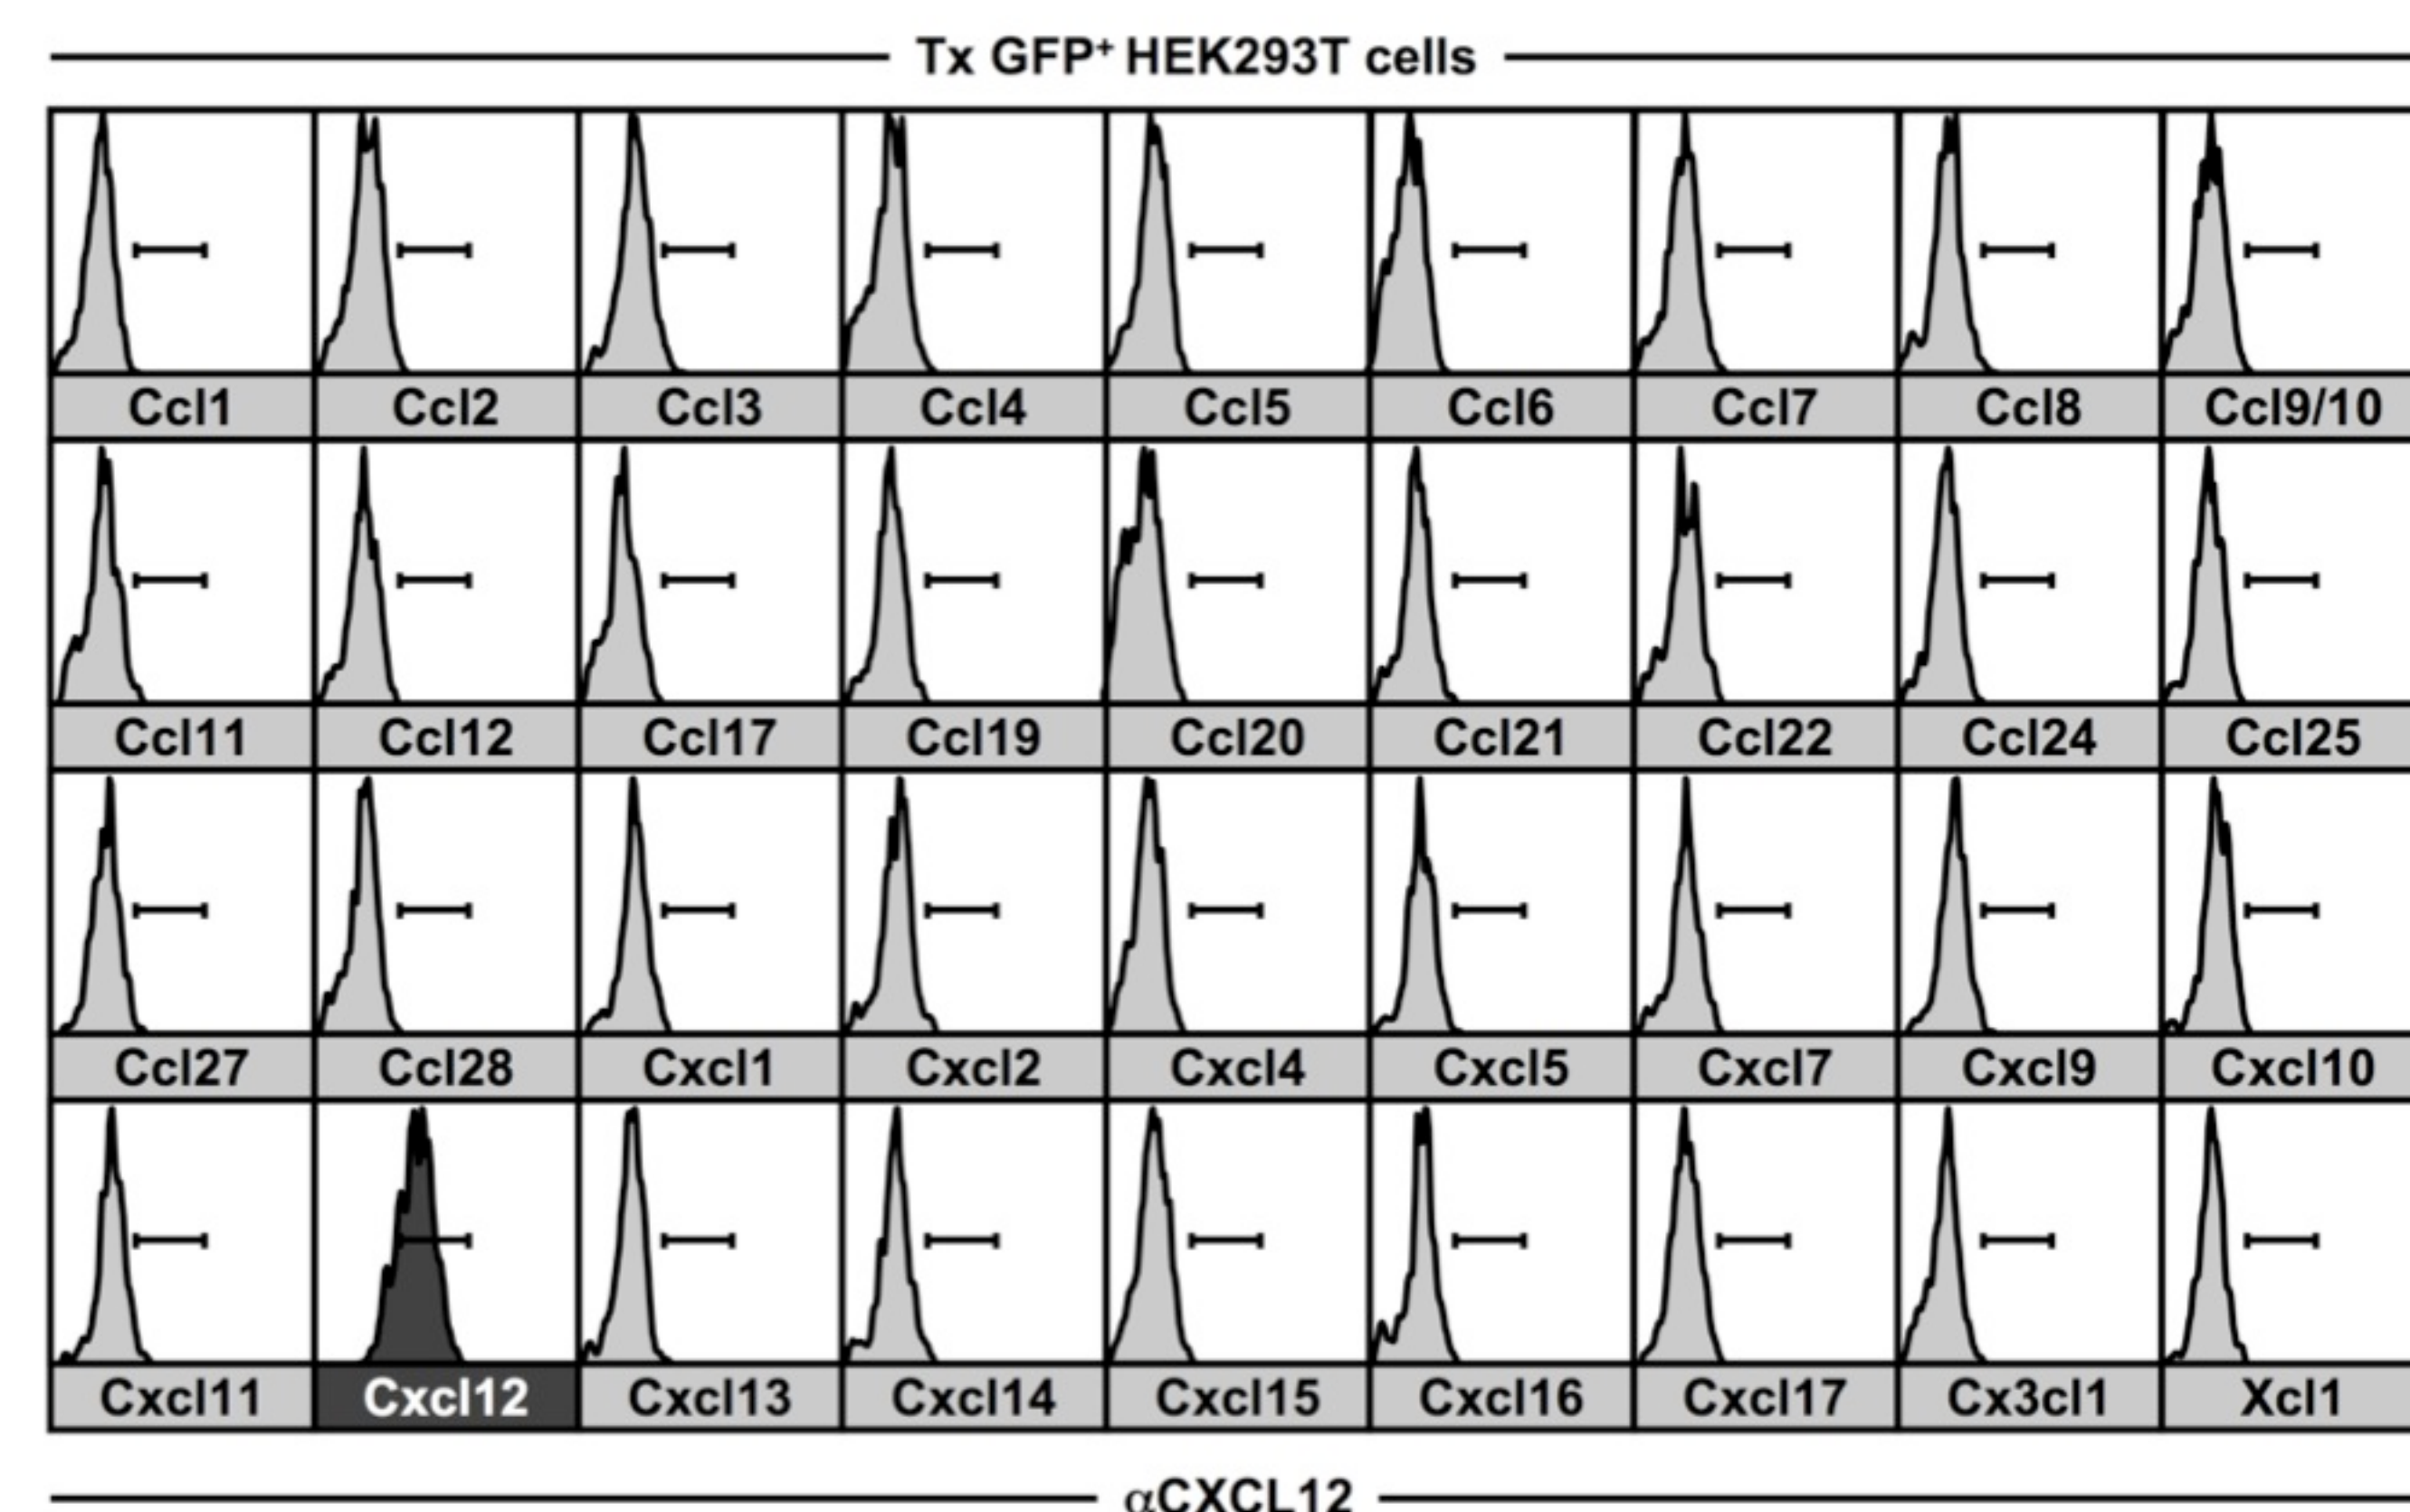

## D.6 ( $\alpha$ CXCL13)

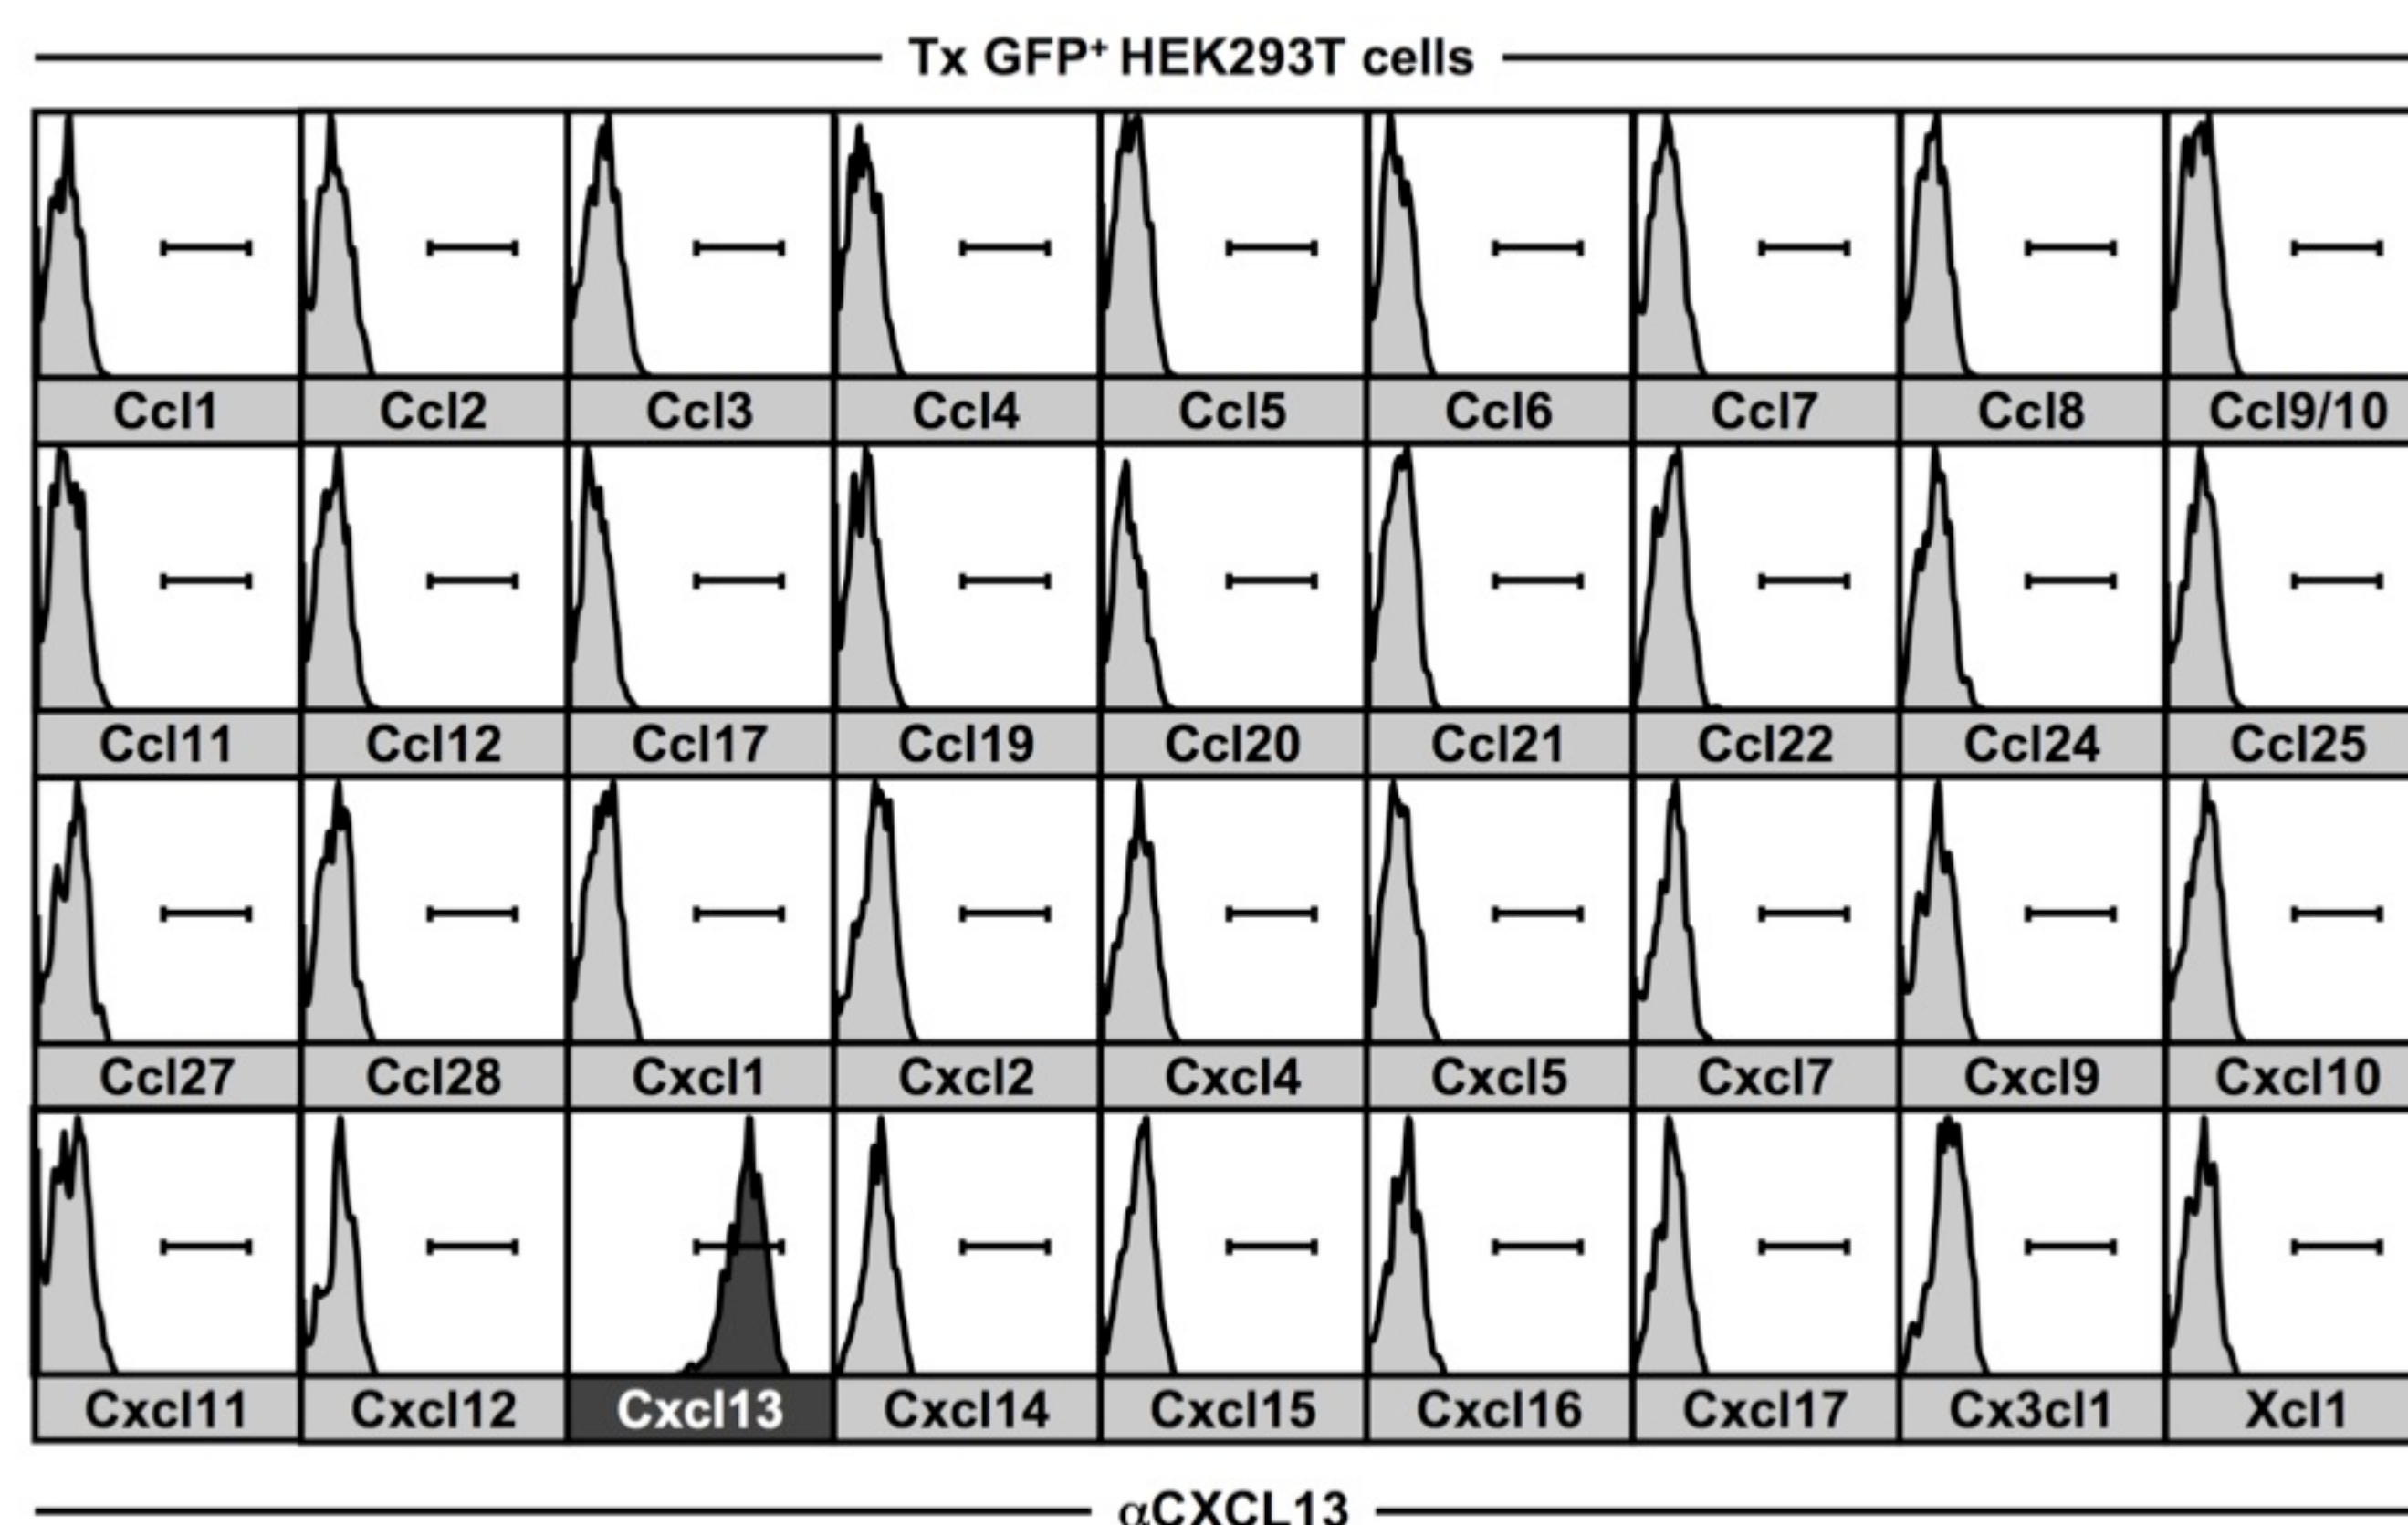

## D.7 ( $\alpha$ CXCL14)

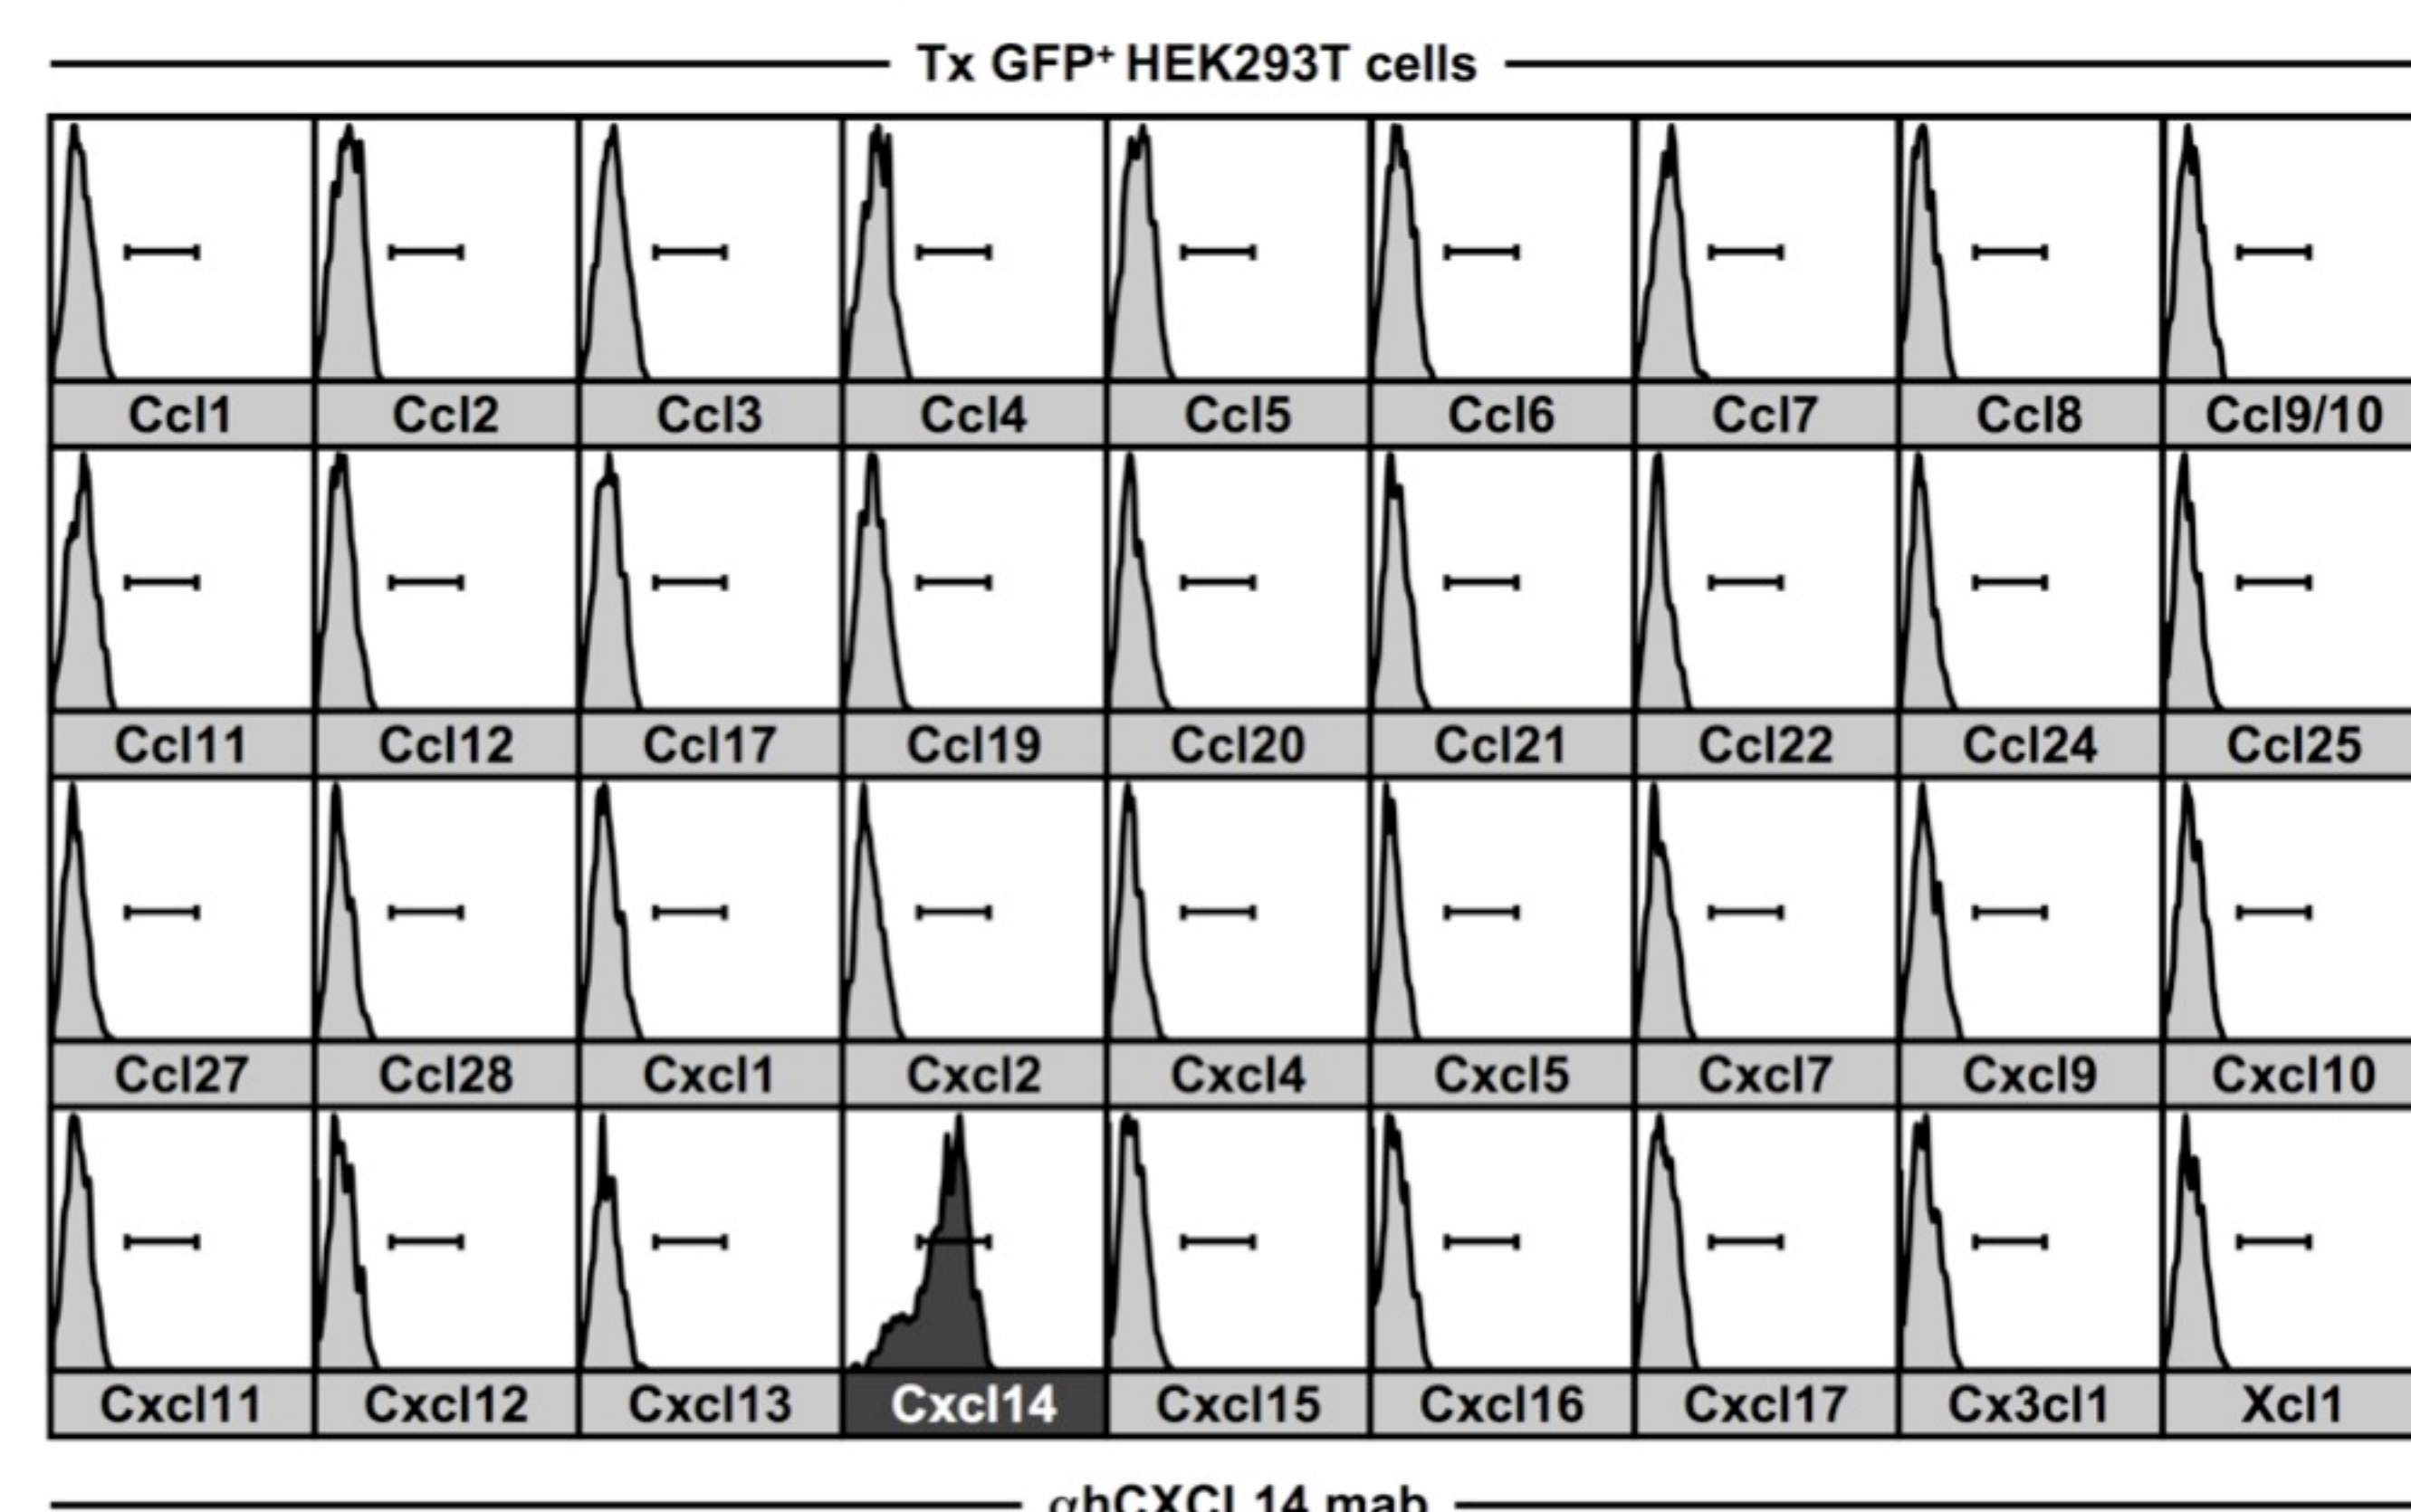

## D.8 ( $\alpha$ CXCL15)

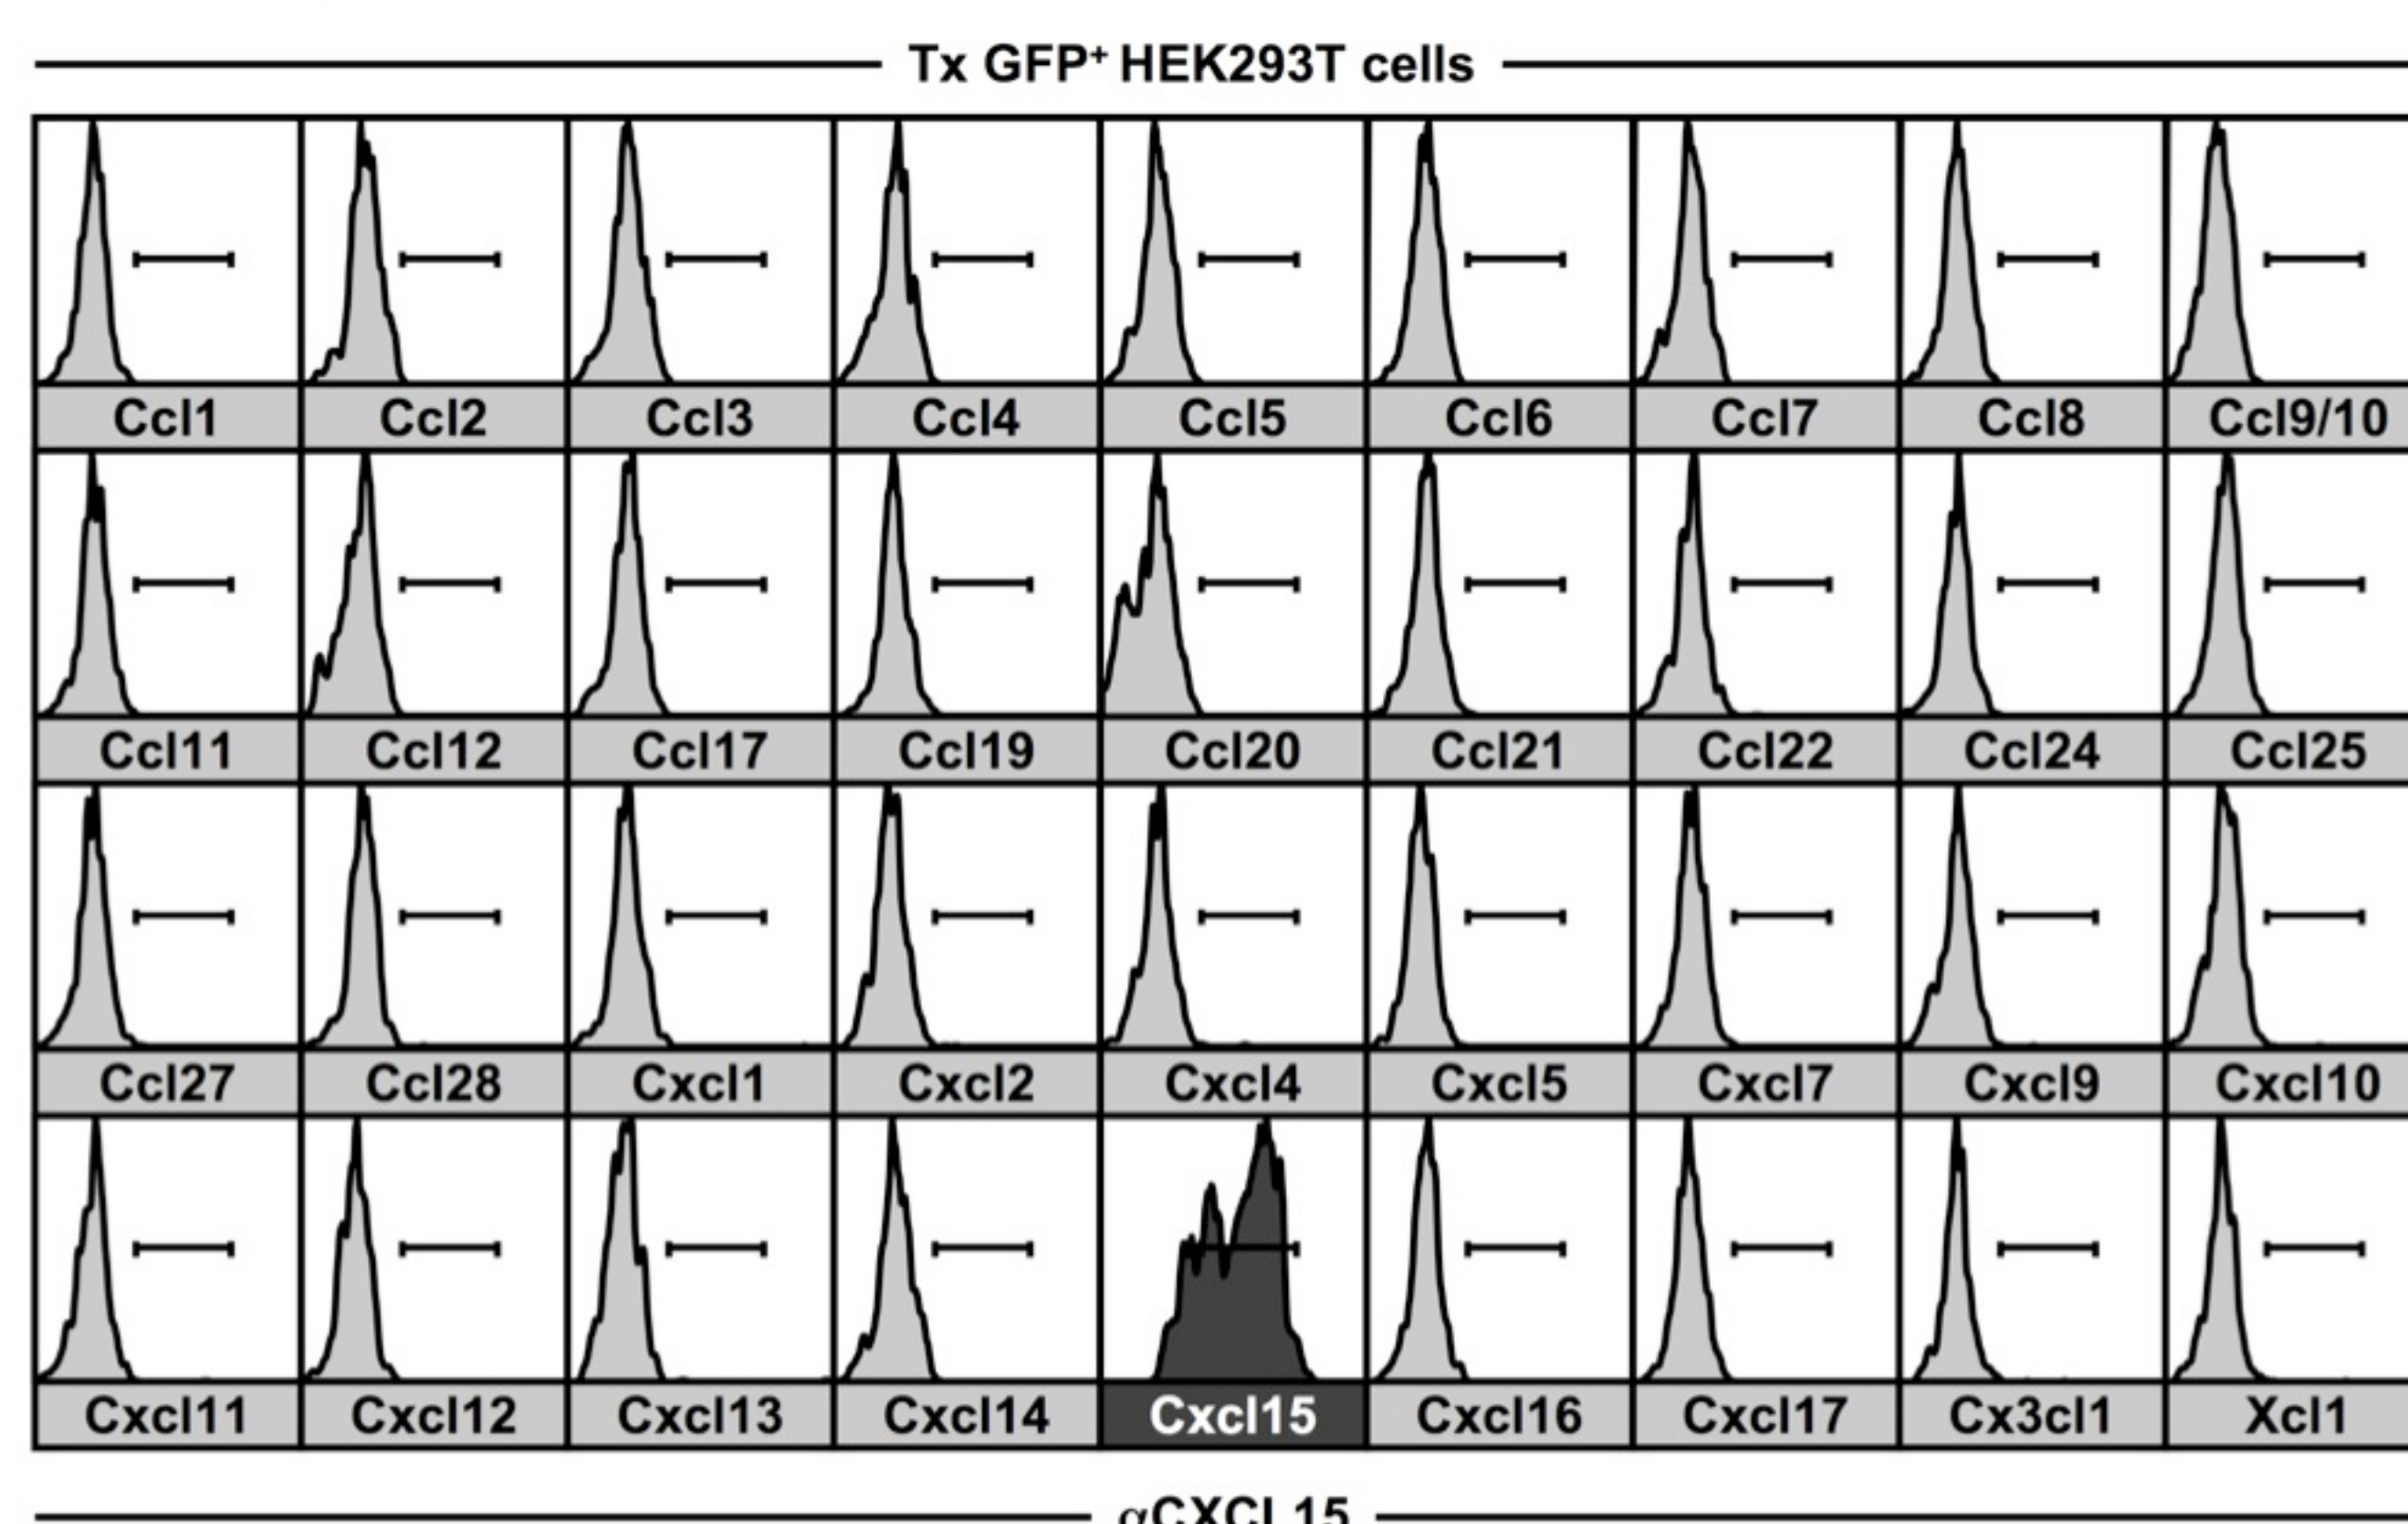

Figure S1, panels E.1-E.4

E.1 ( $\alpha$ CXCL16)

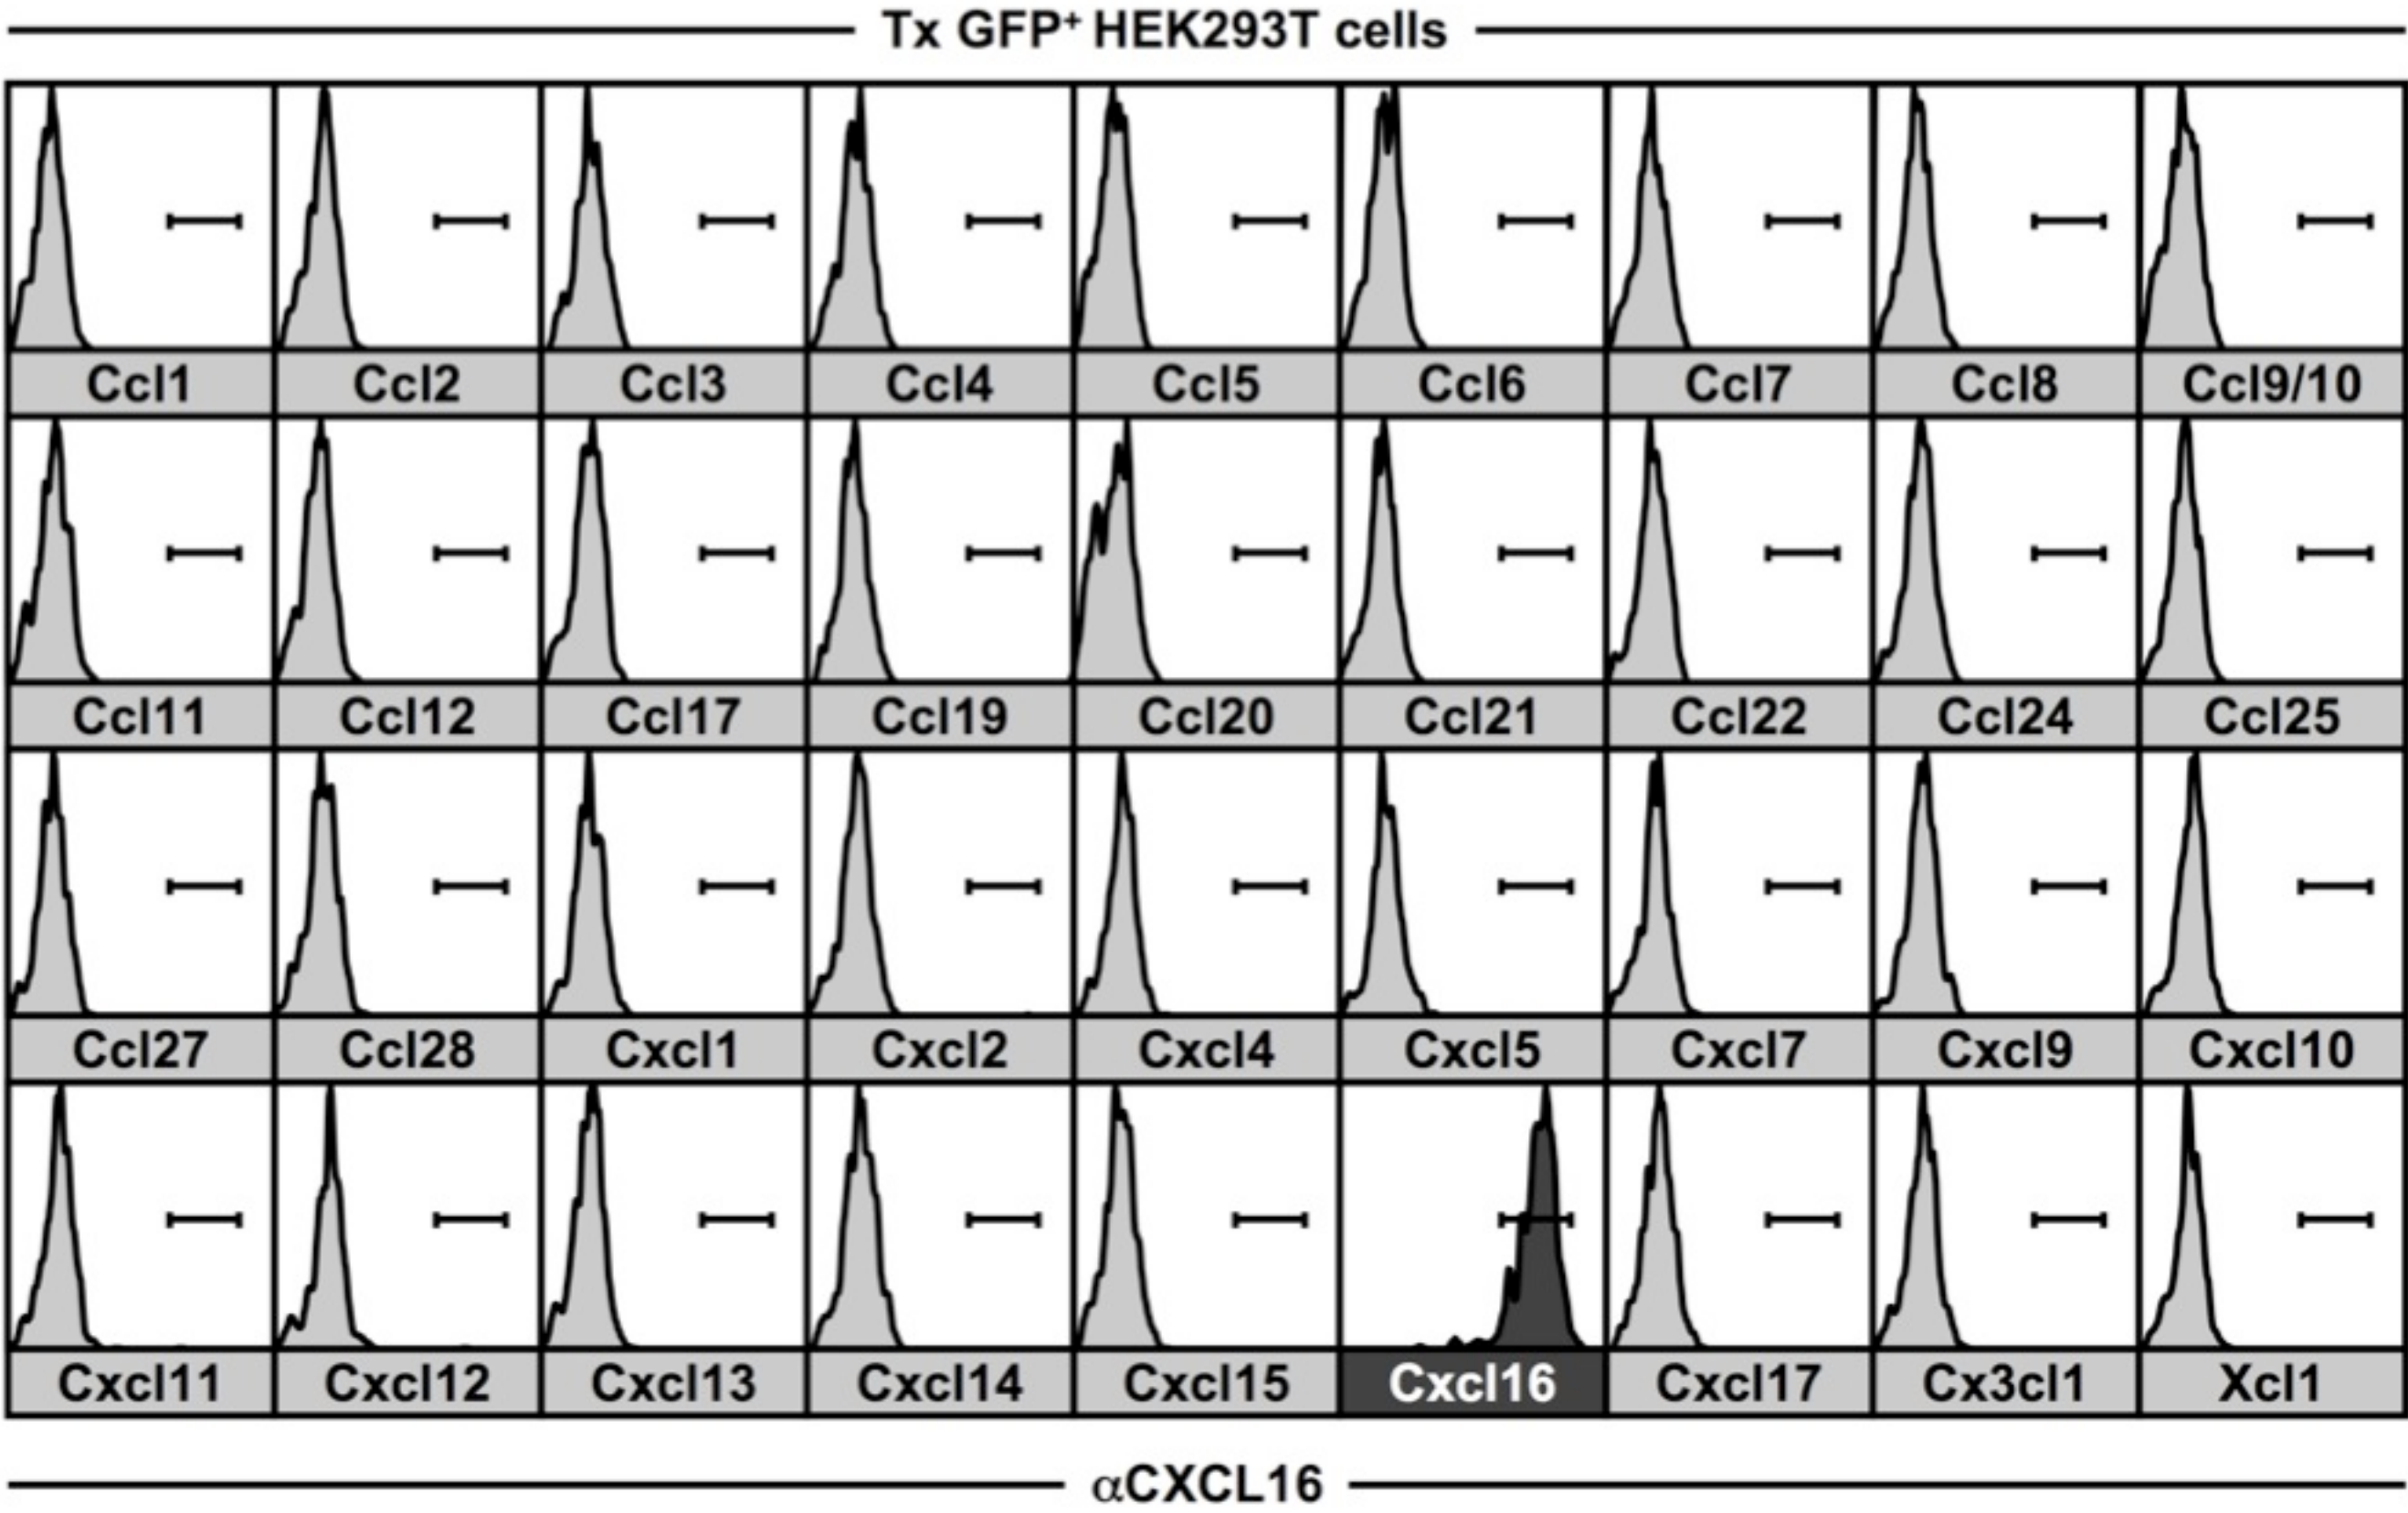

E.2 ( $\alpha$ CXCL17)

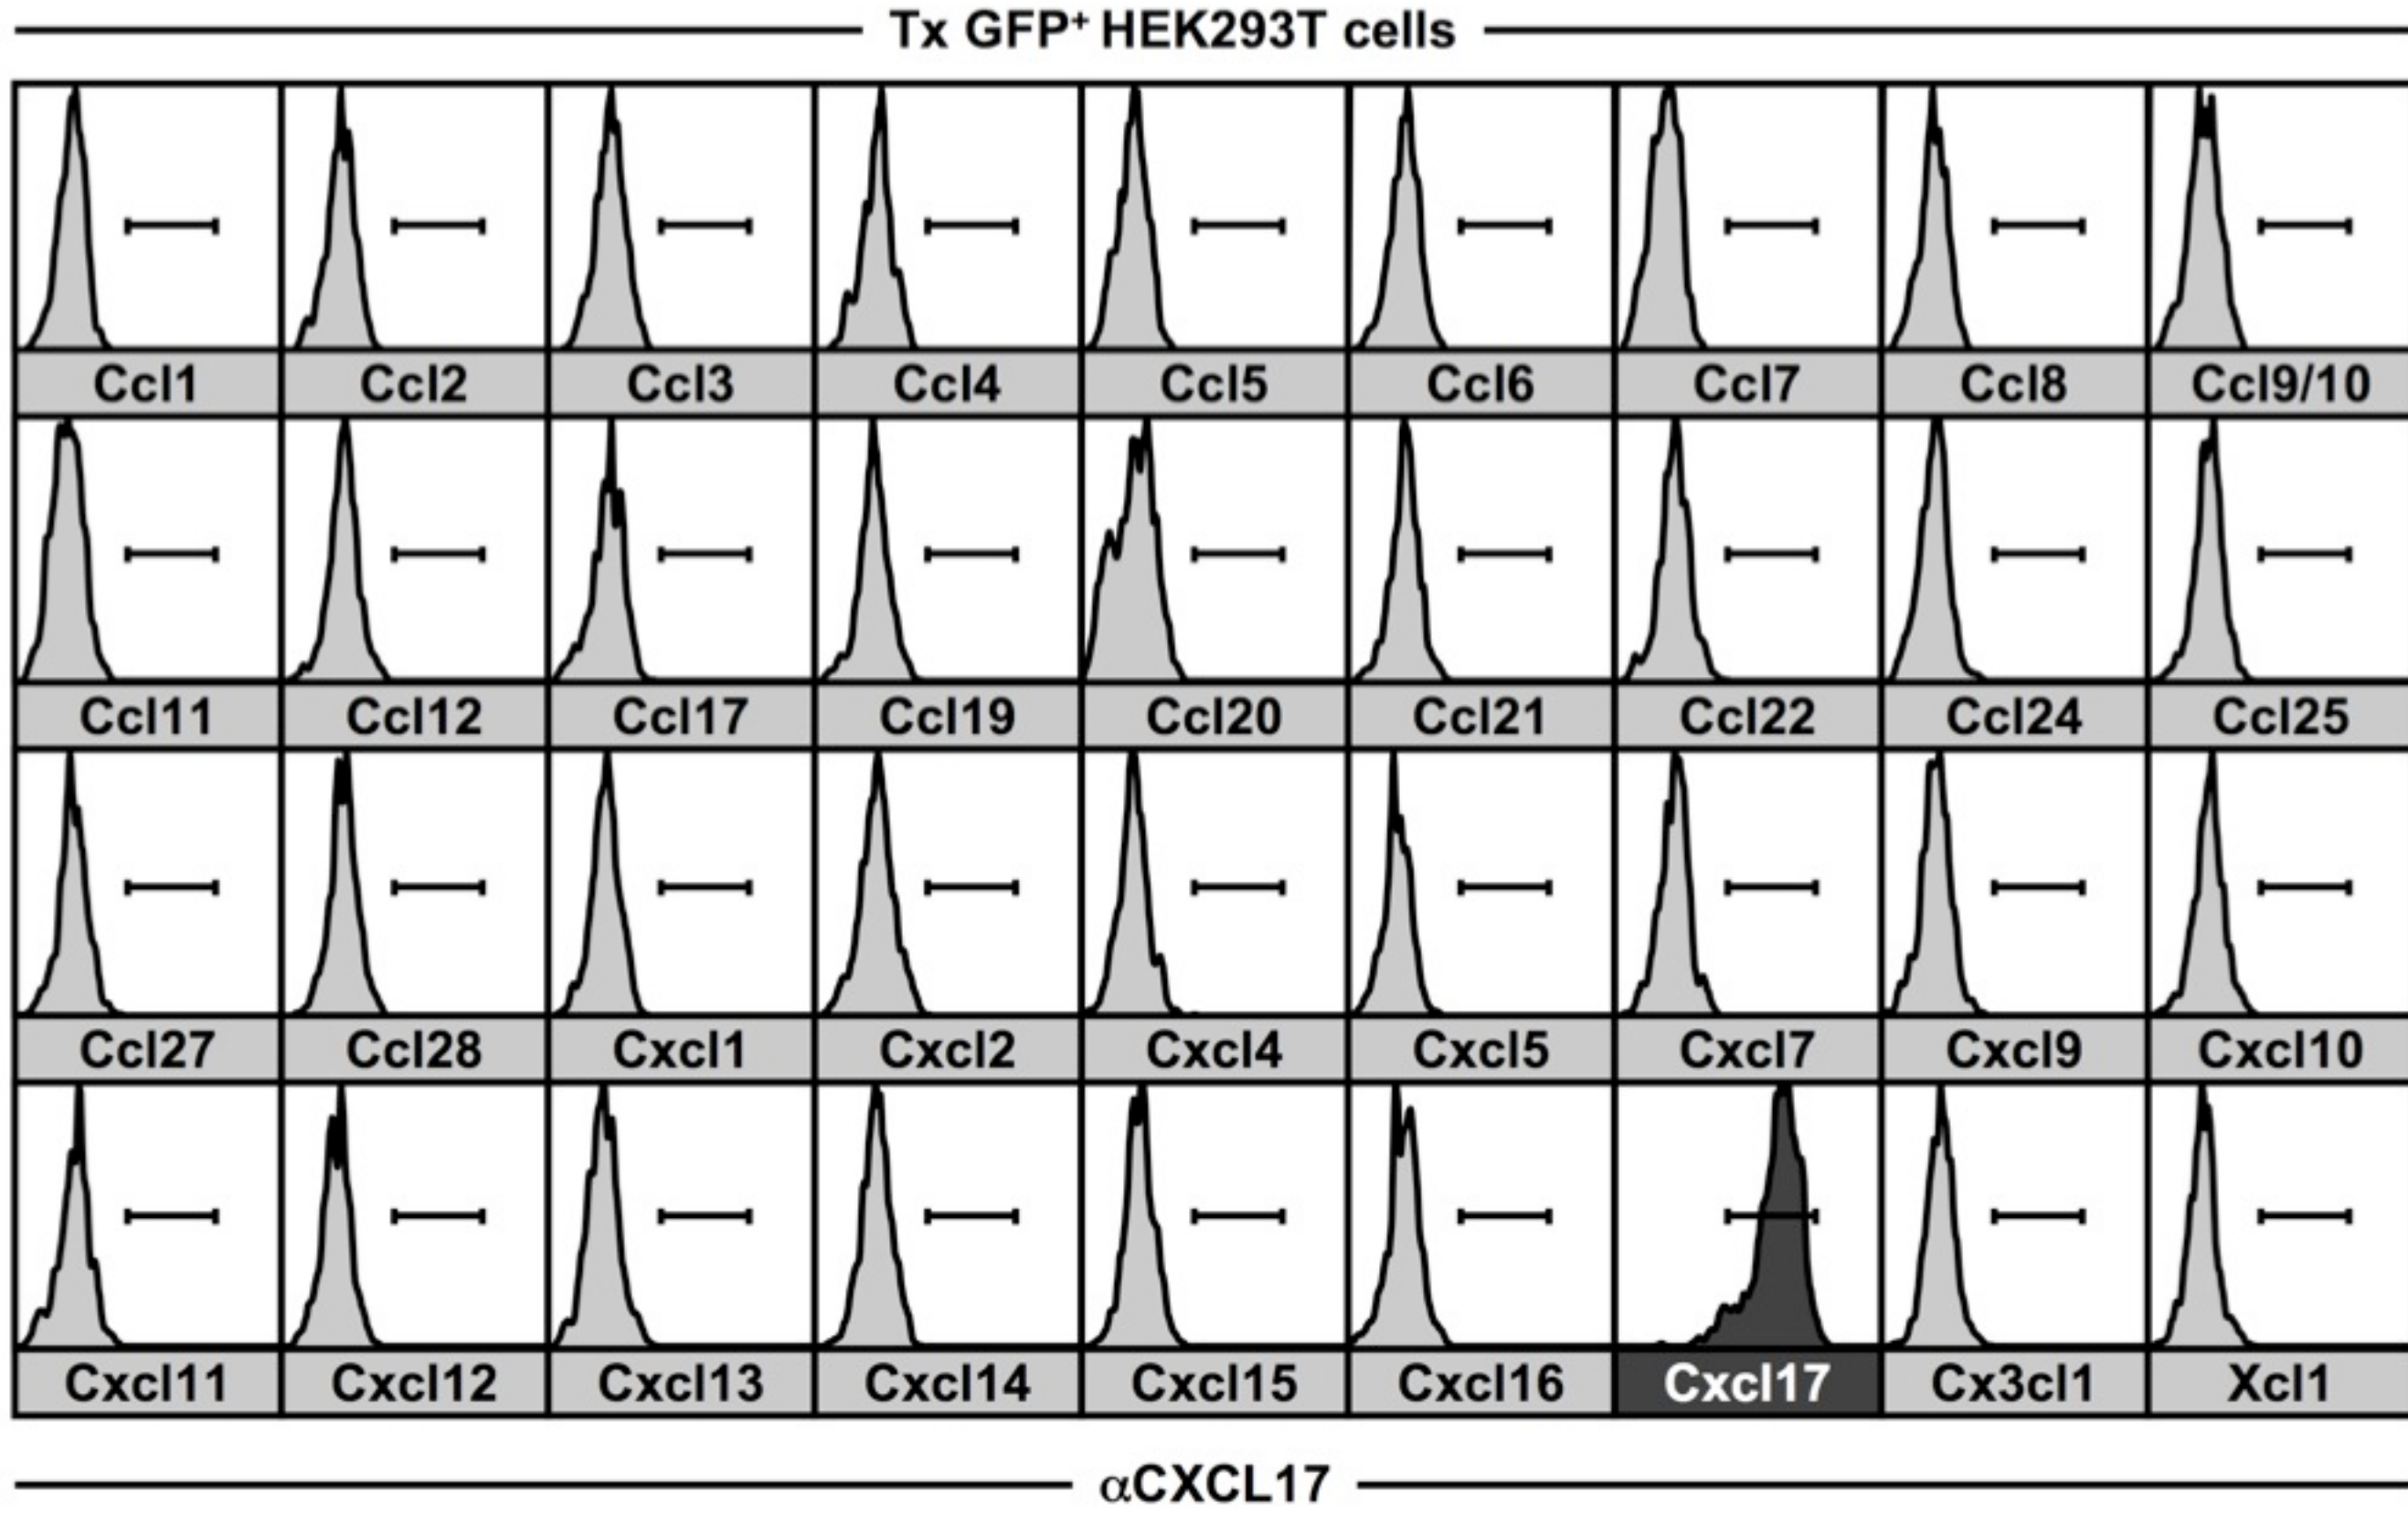

E.3 ( $\alpha$ CX<sub>3</sub>CL1)

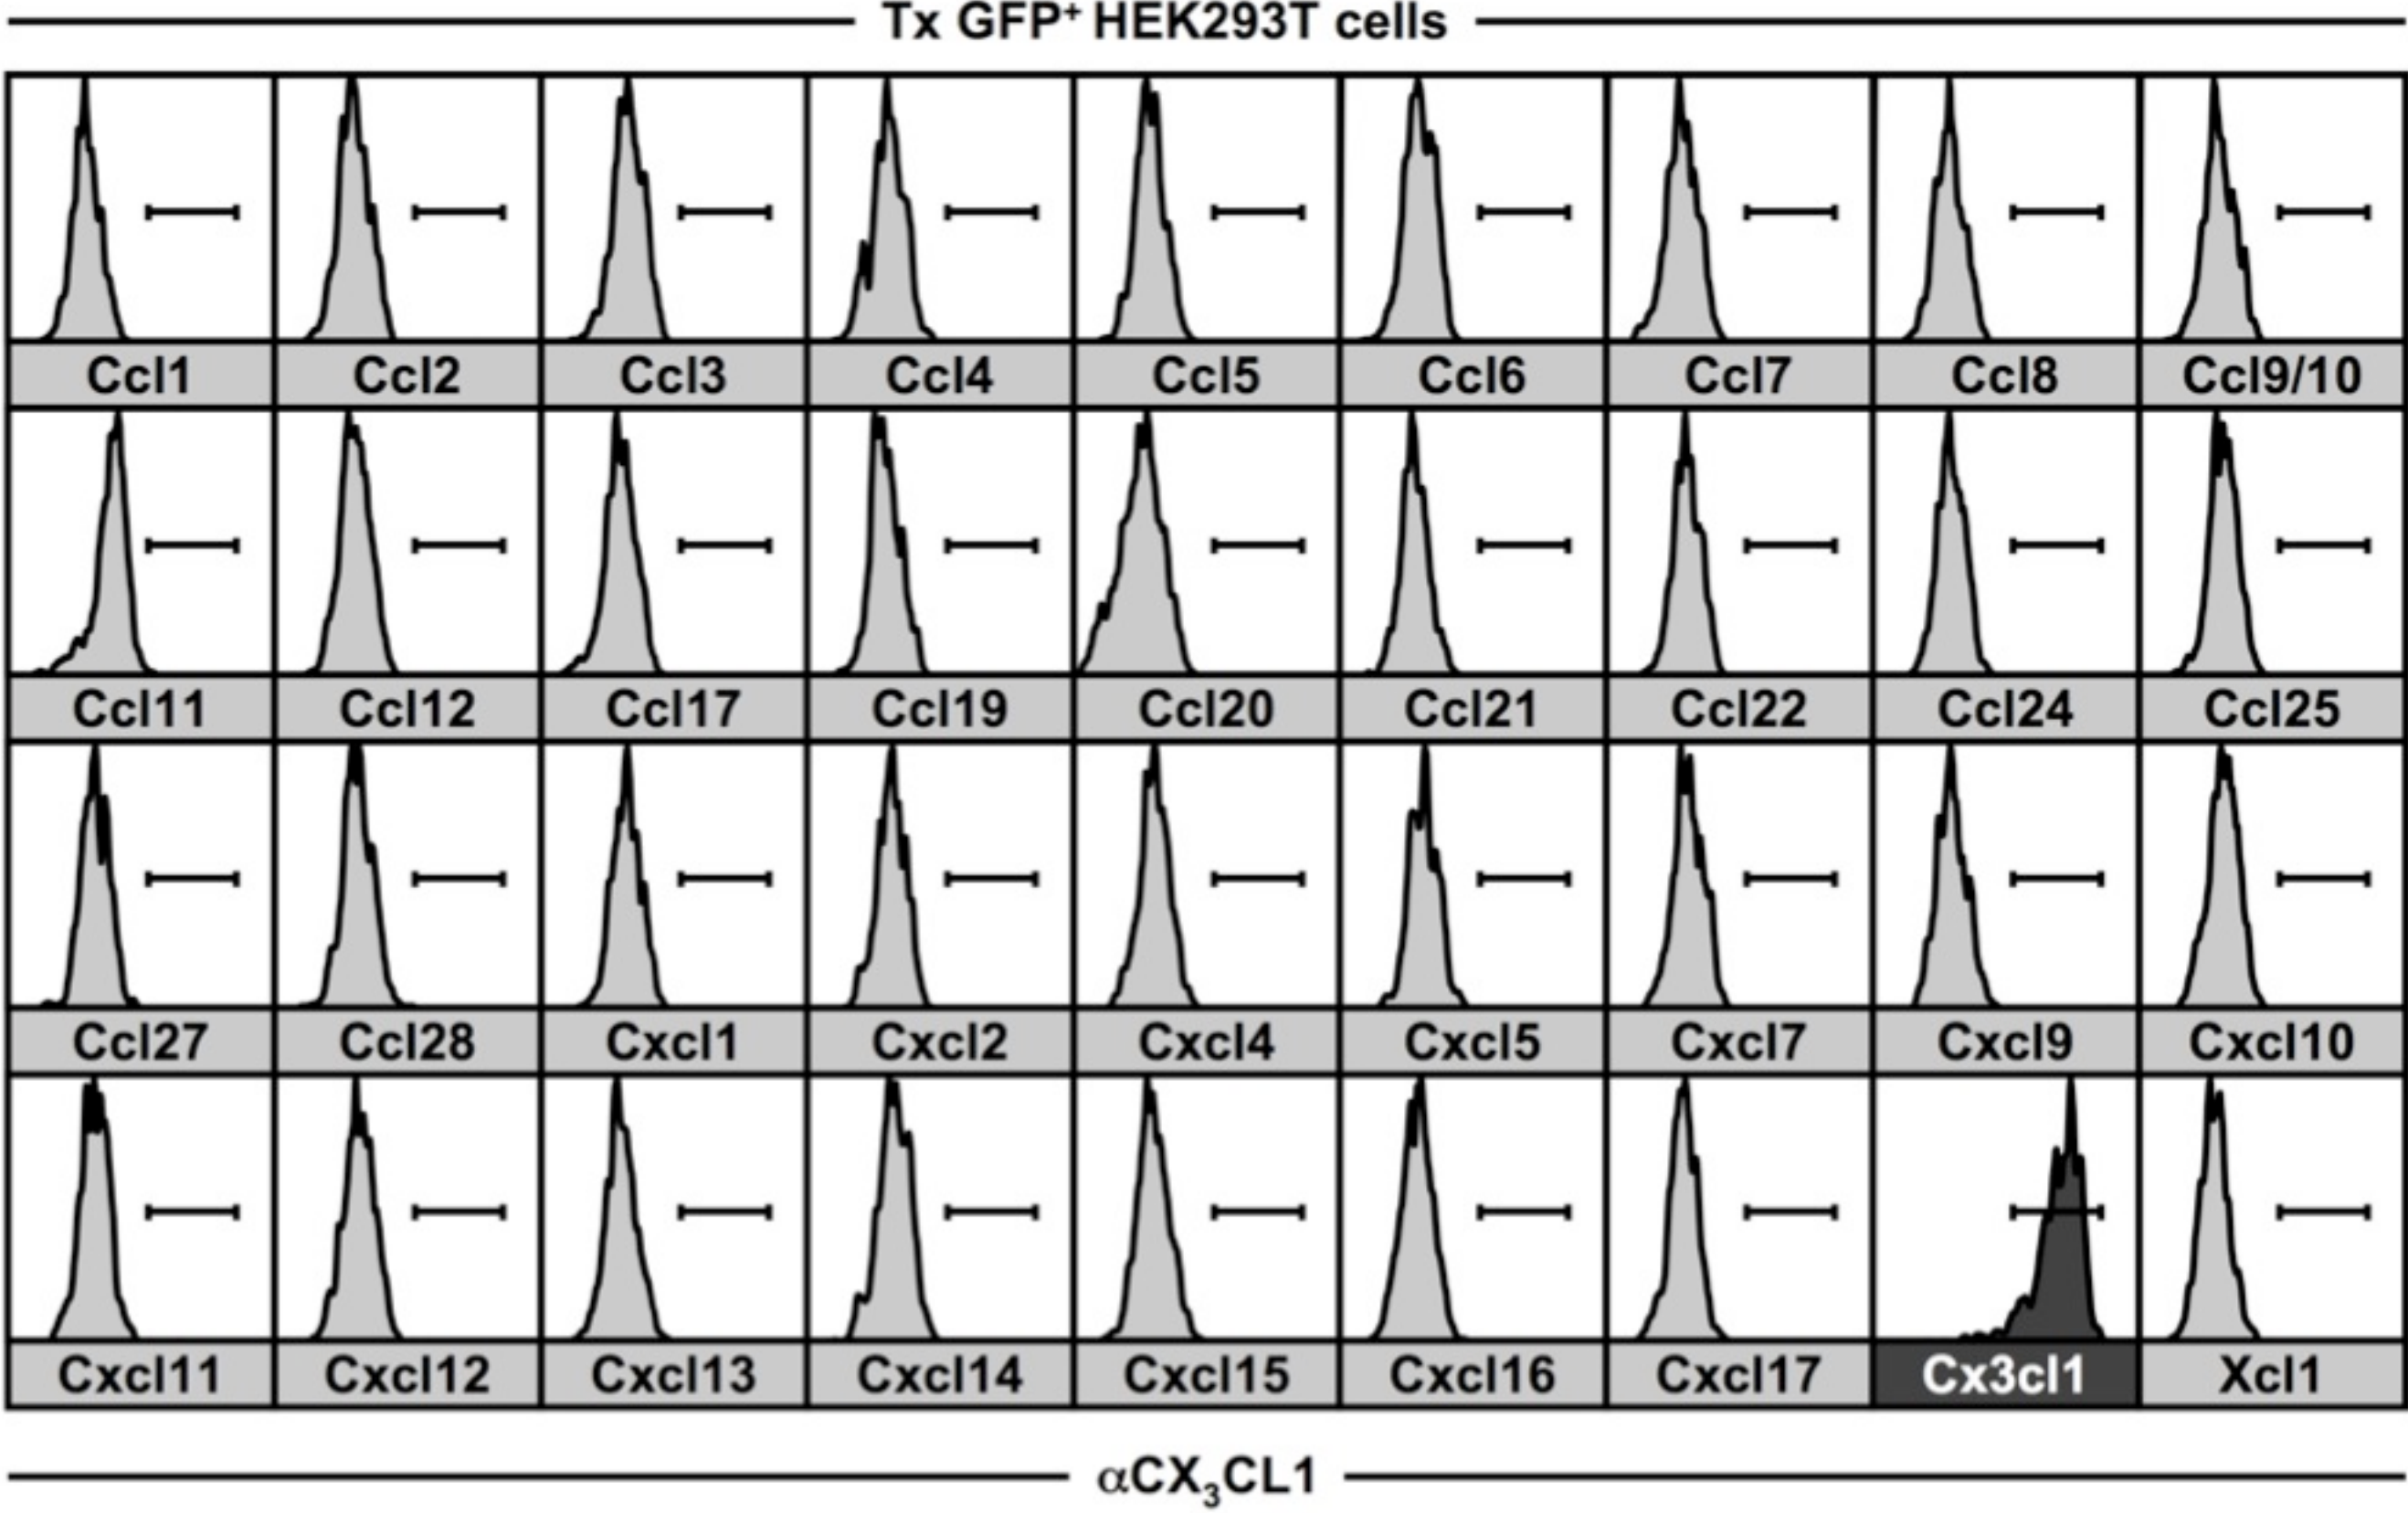

E.4 ( $\alpha$ XCL1)

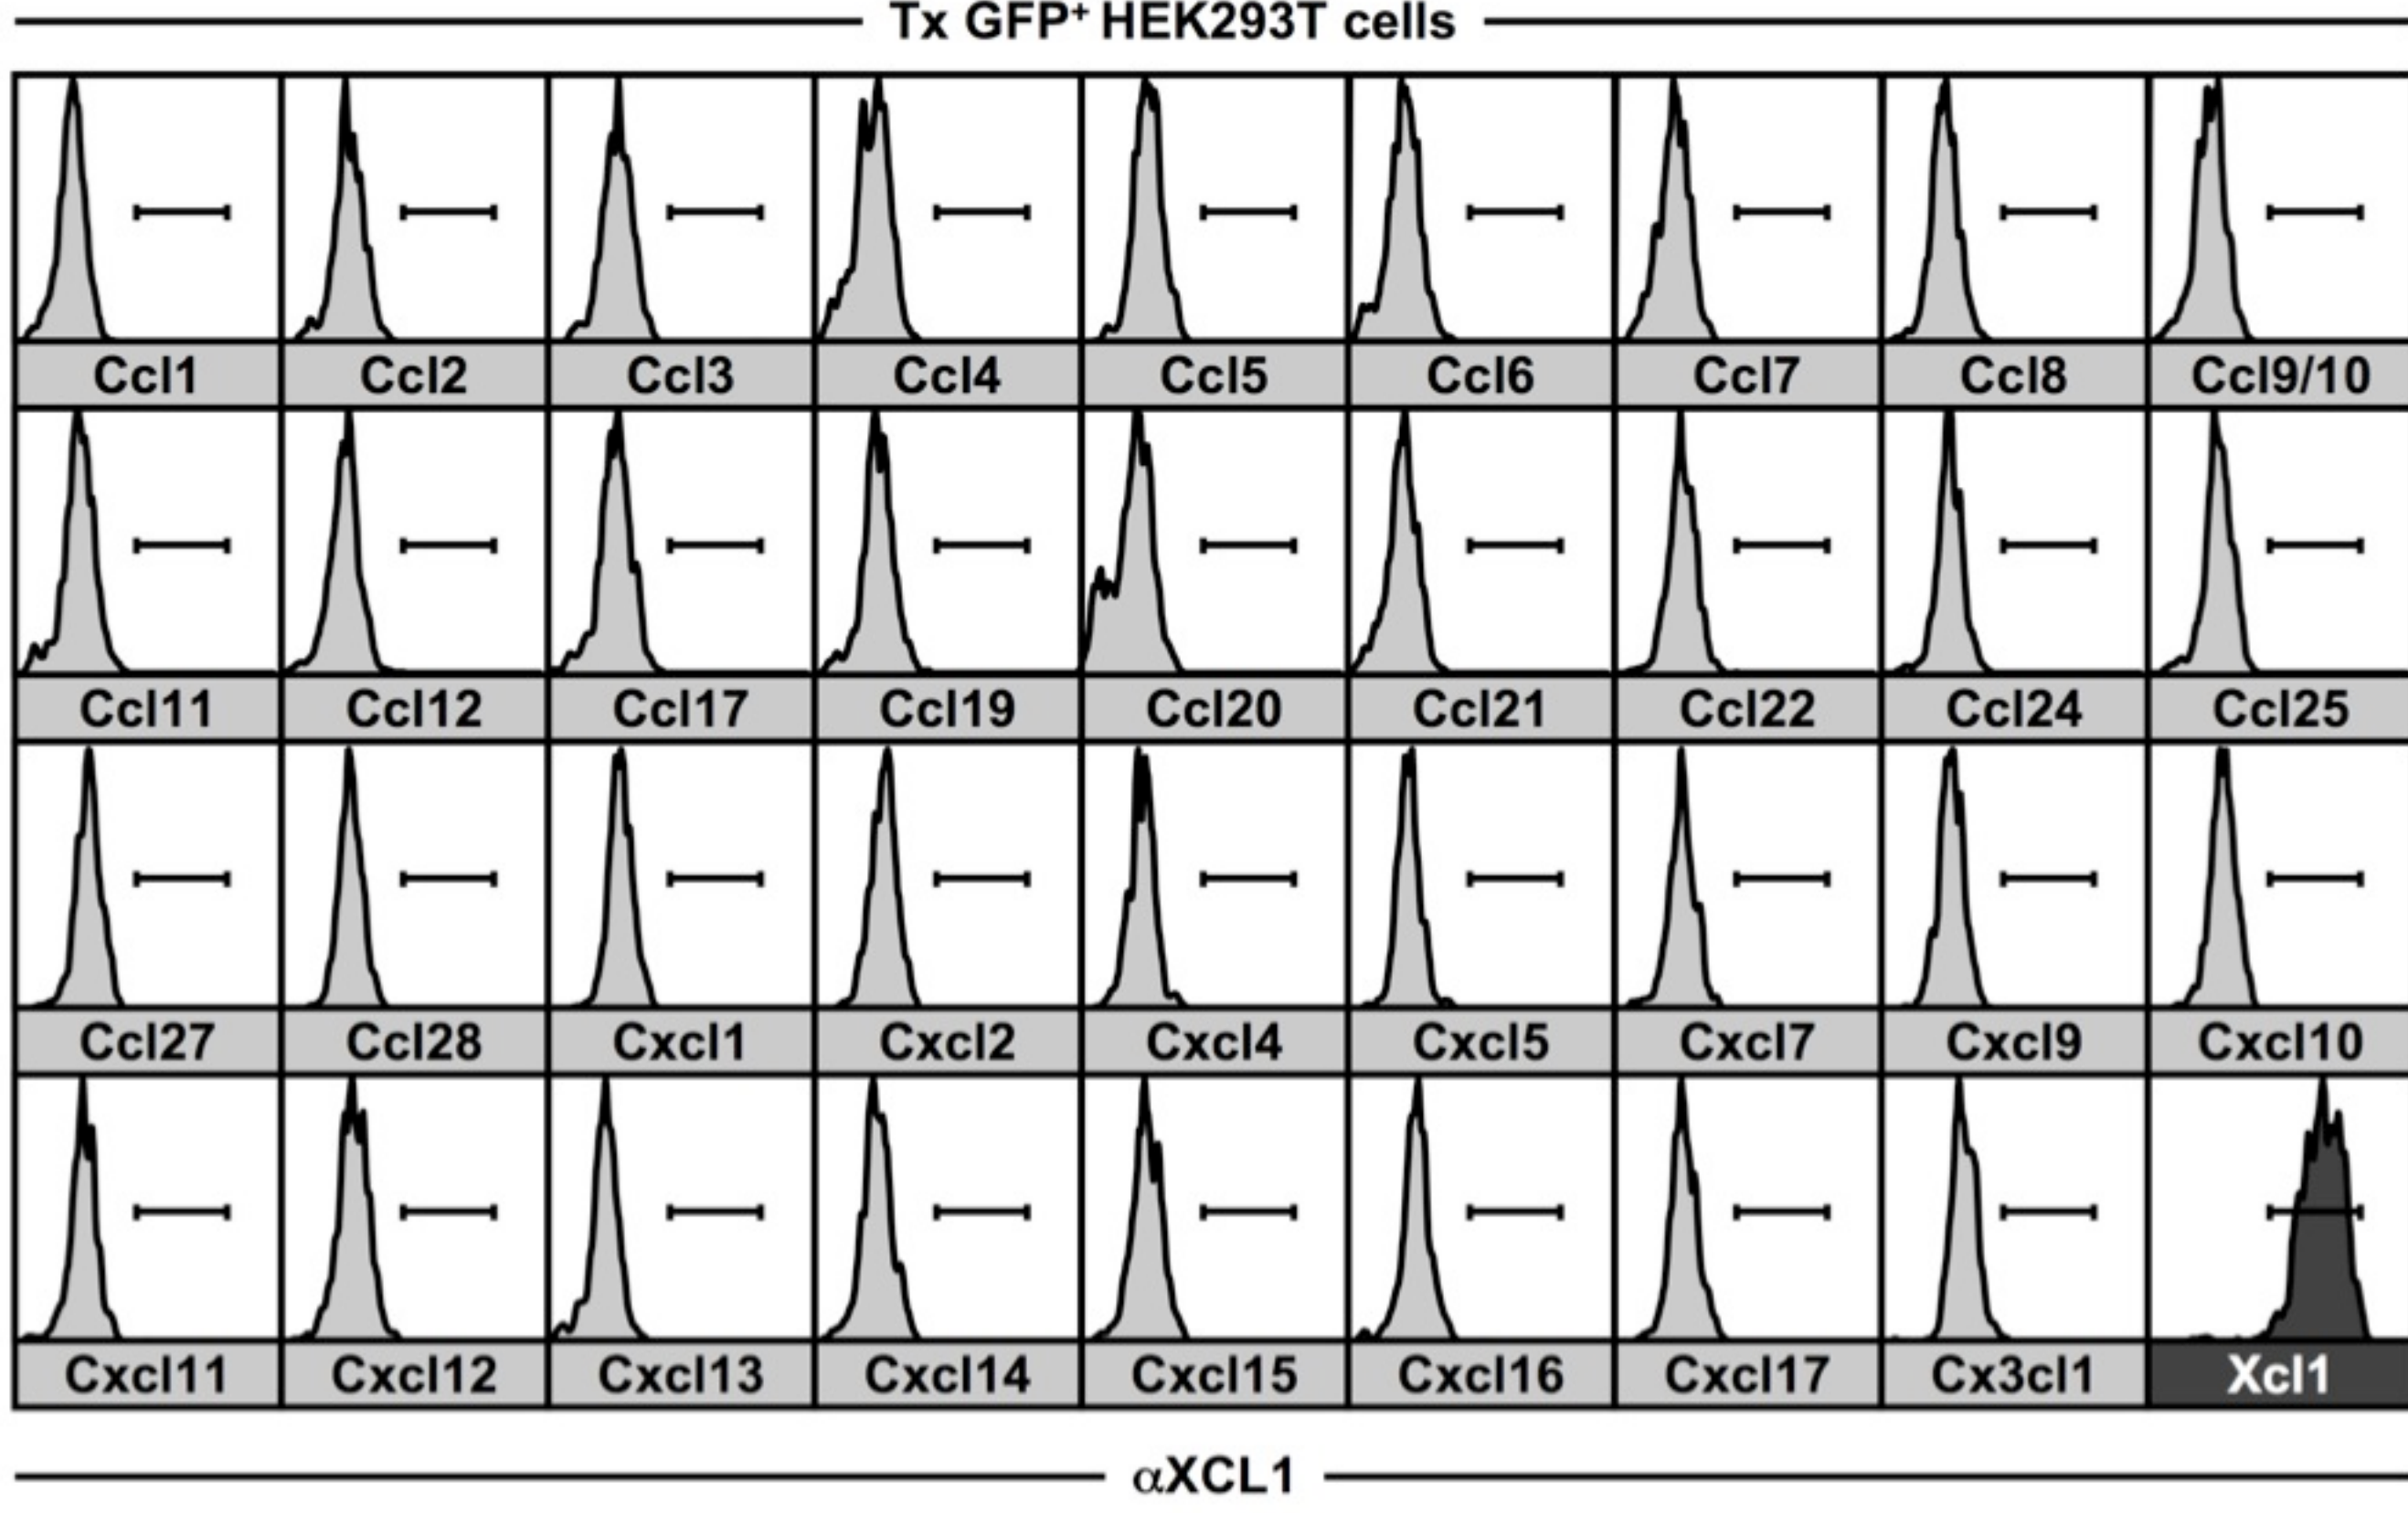

**Figure S2**

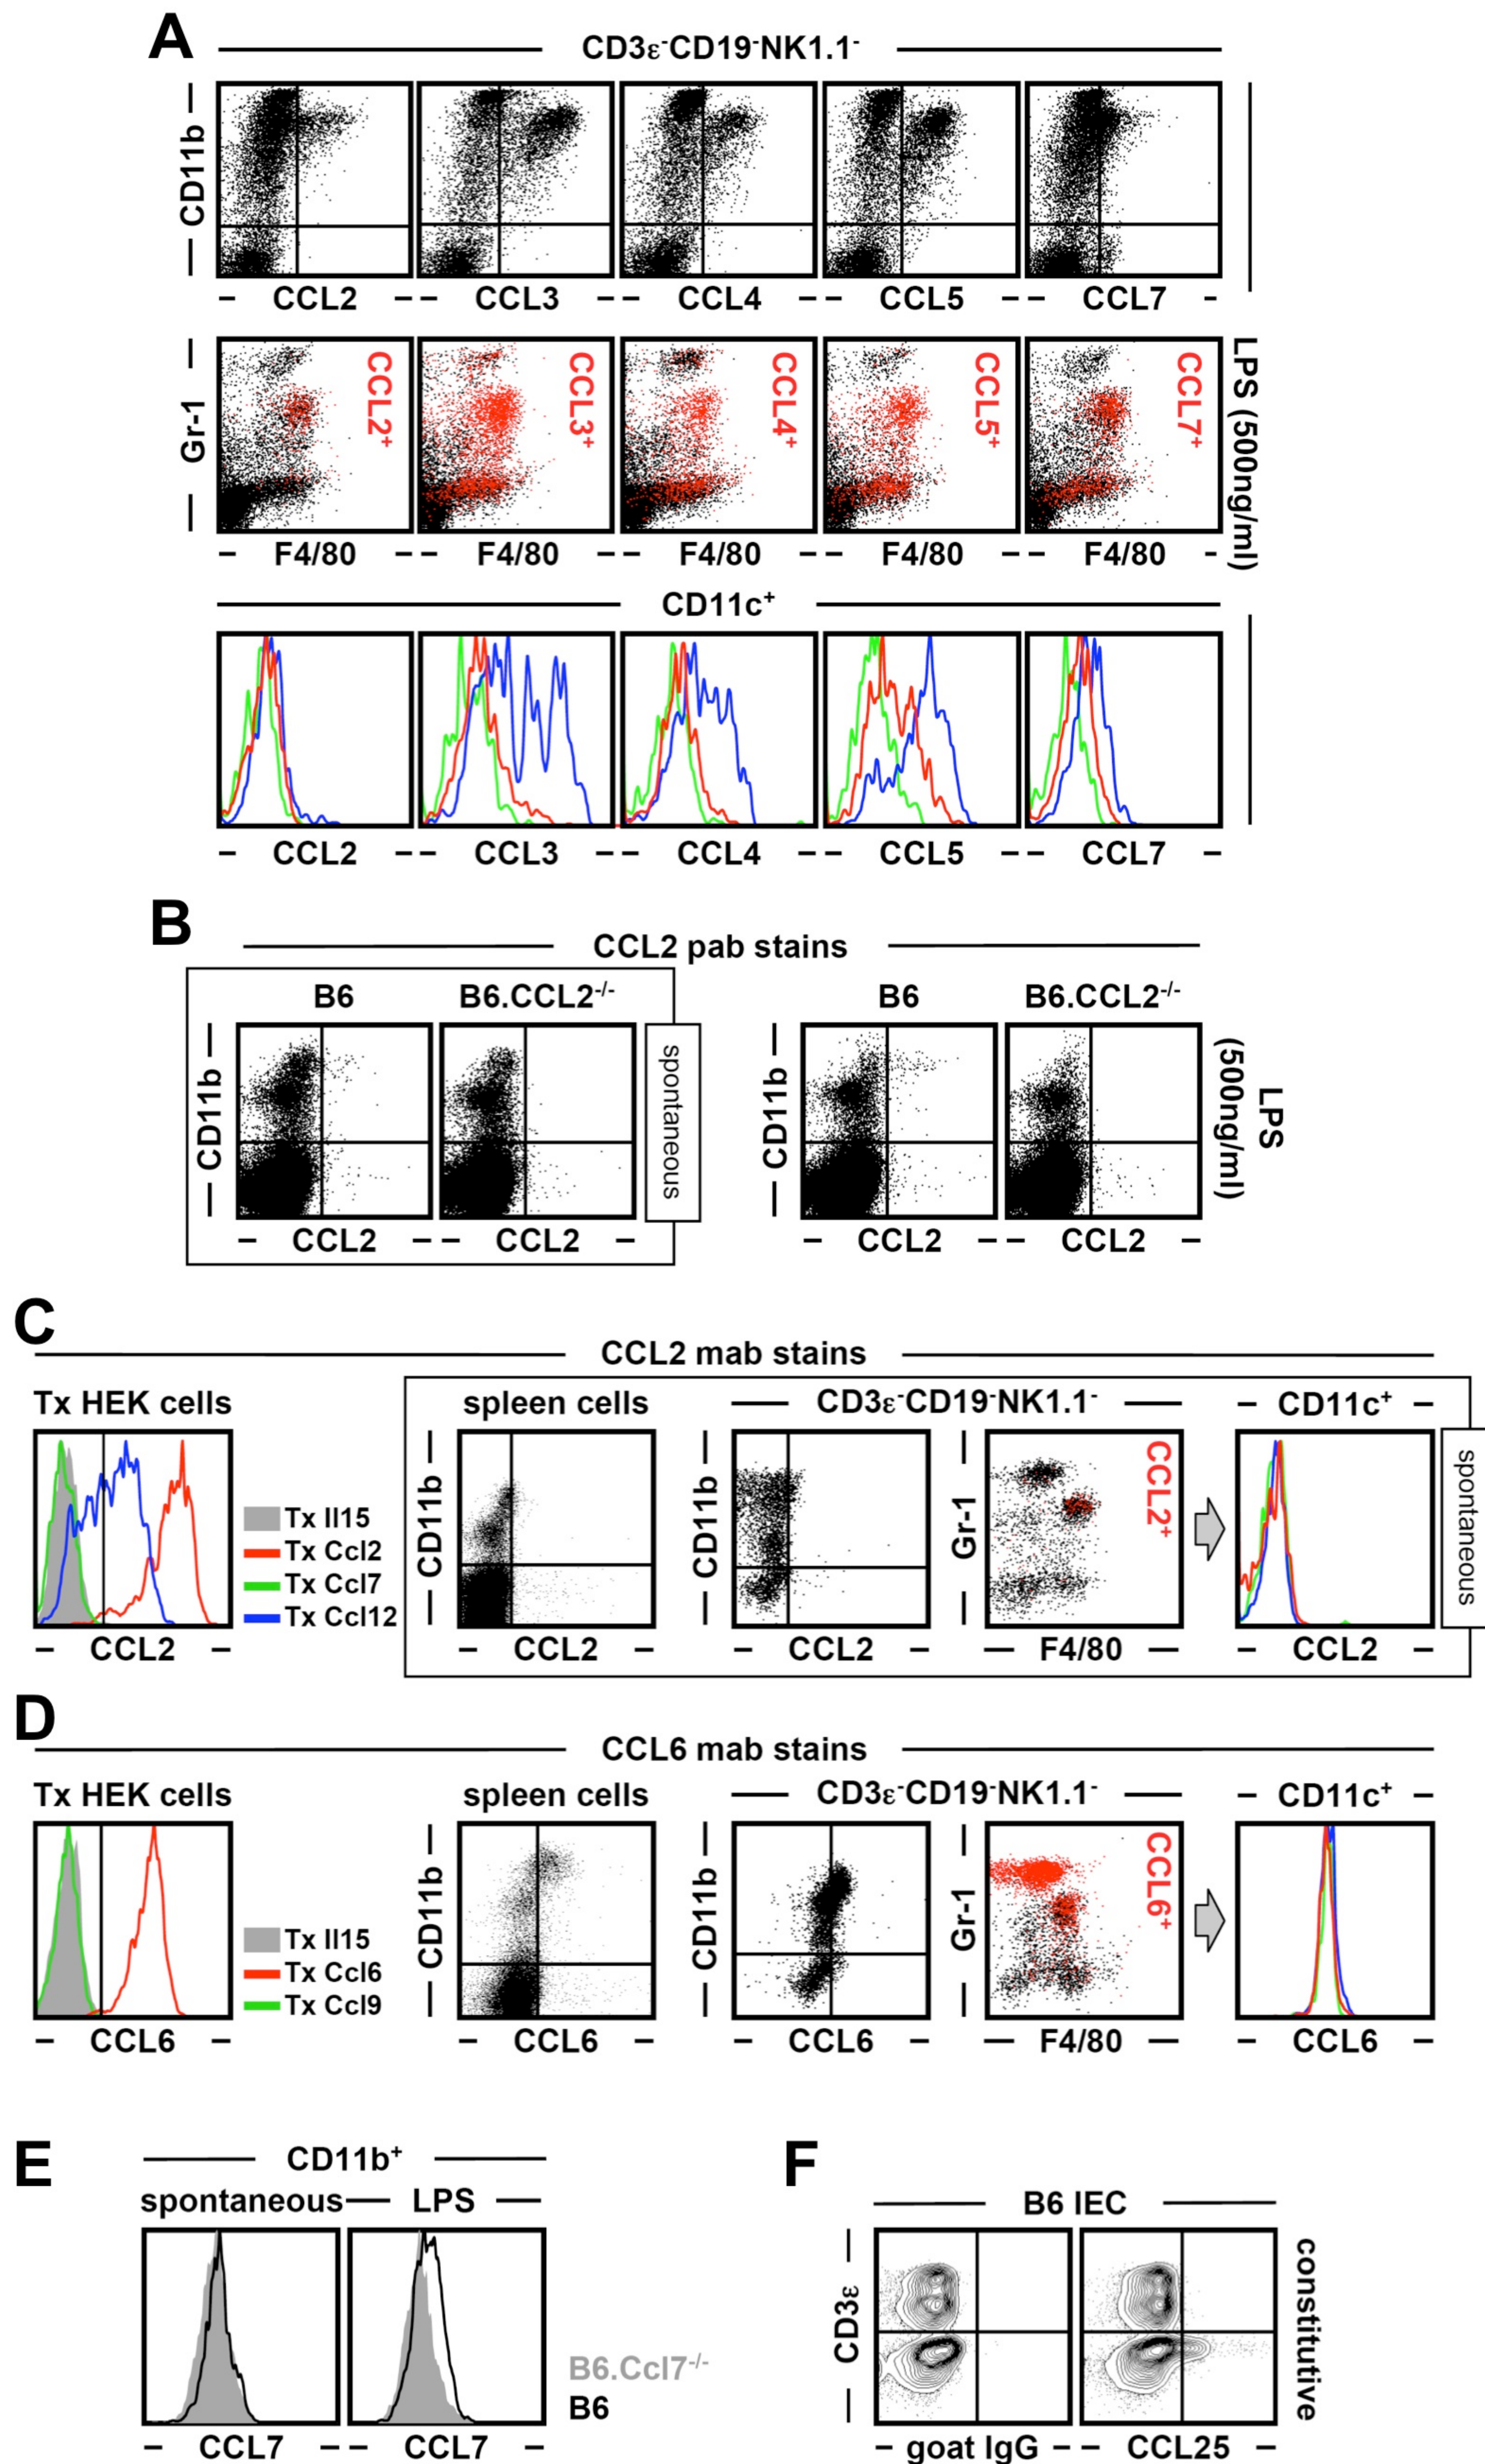

**Figure S3**

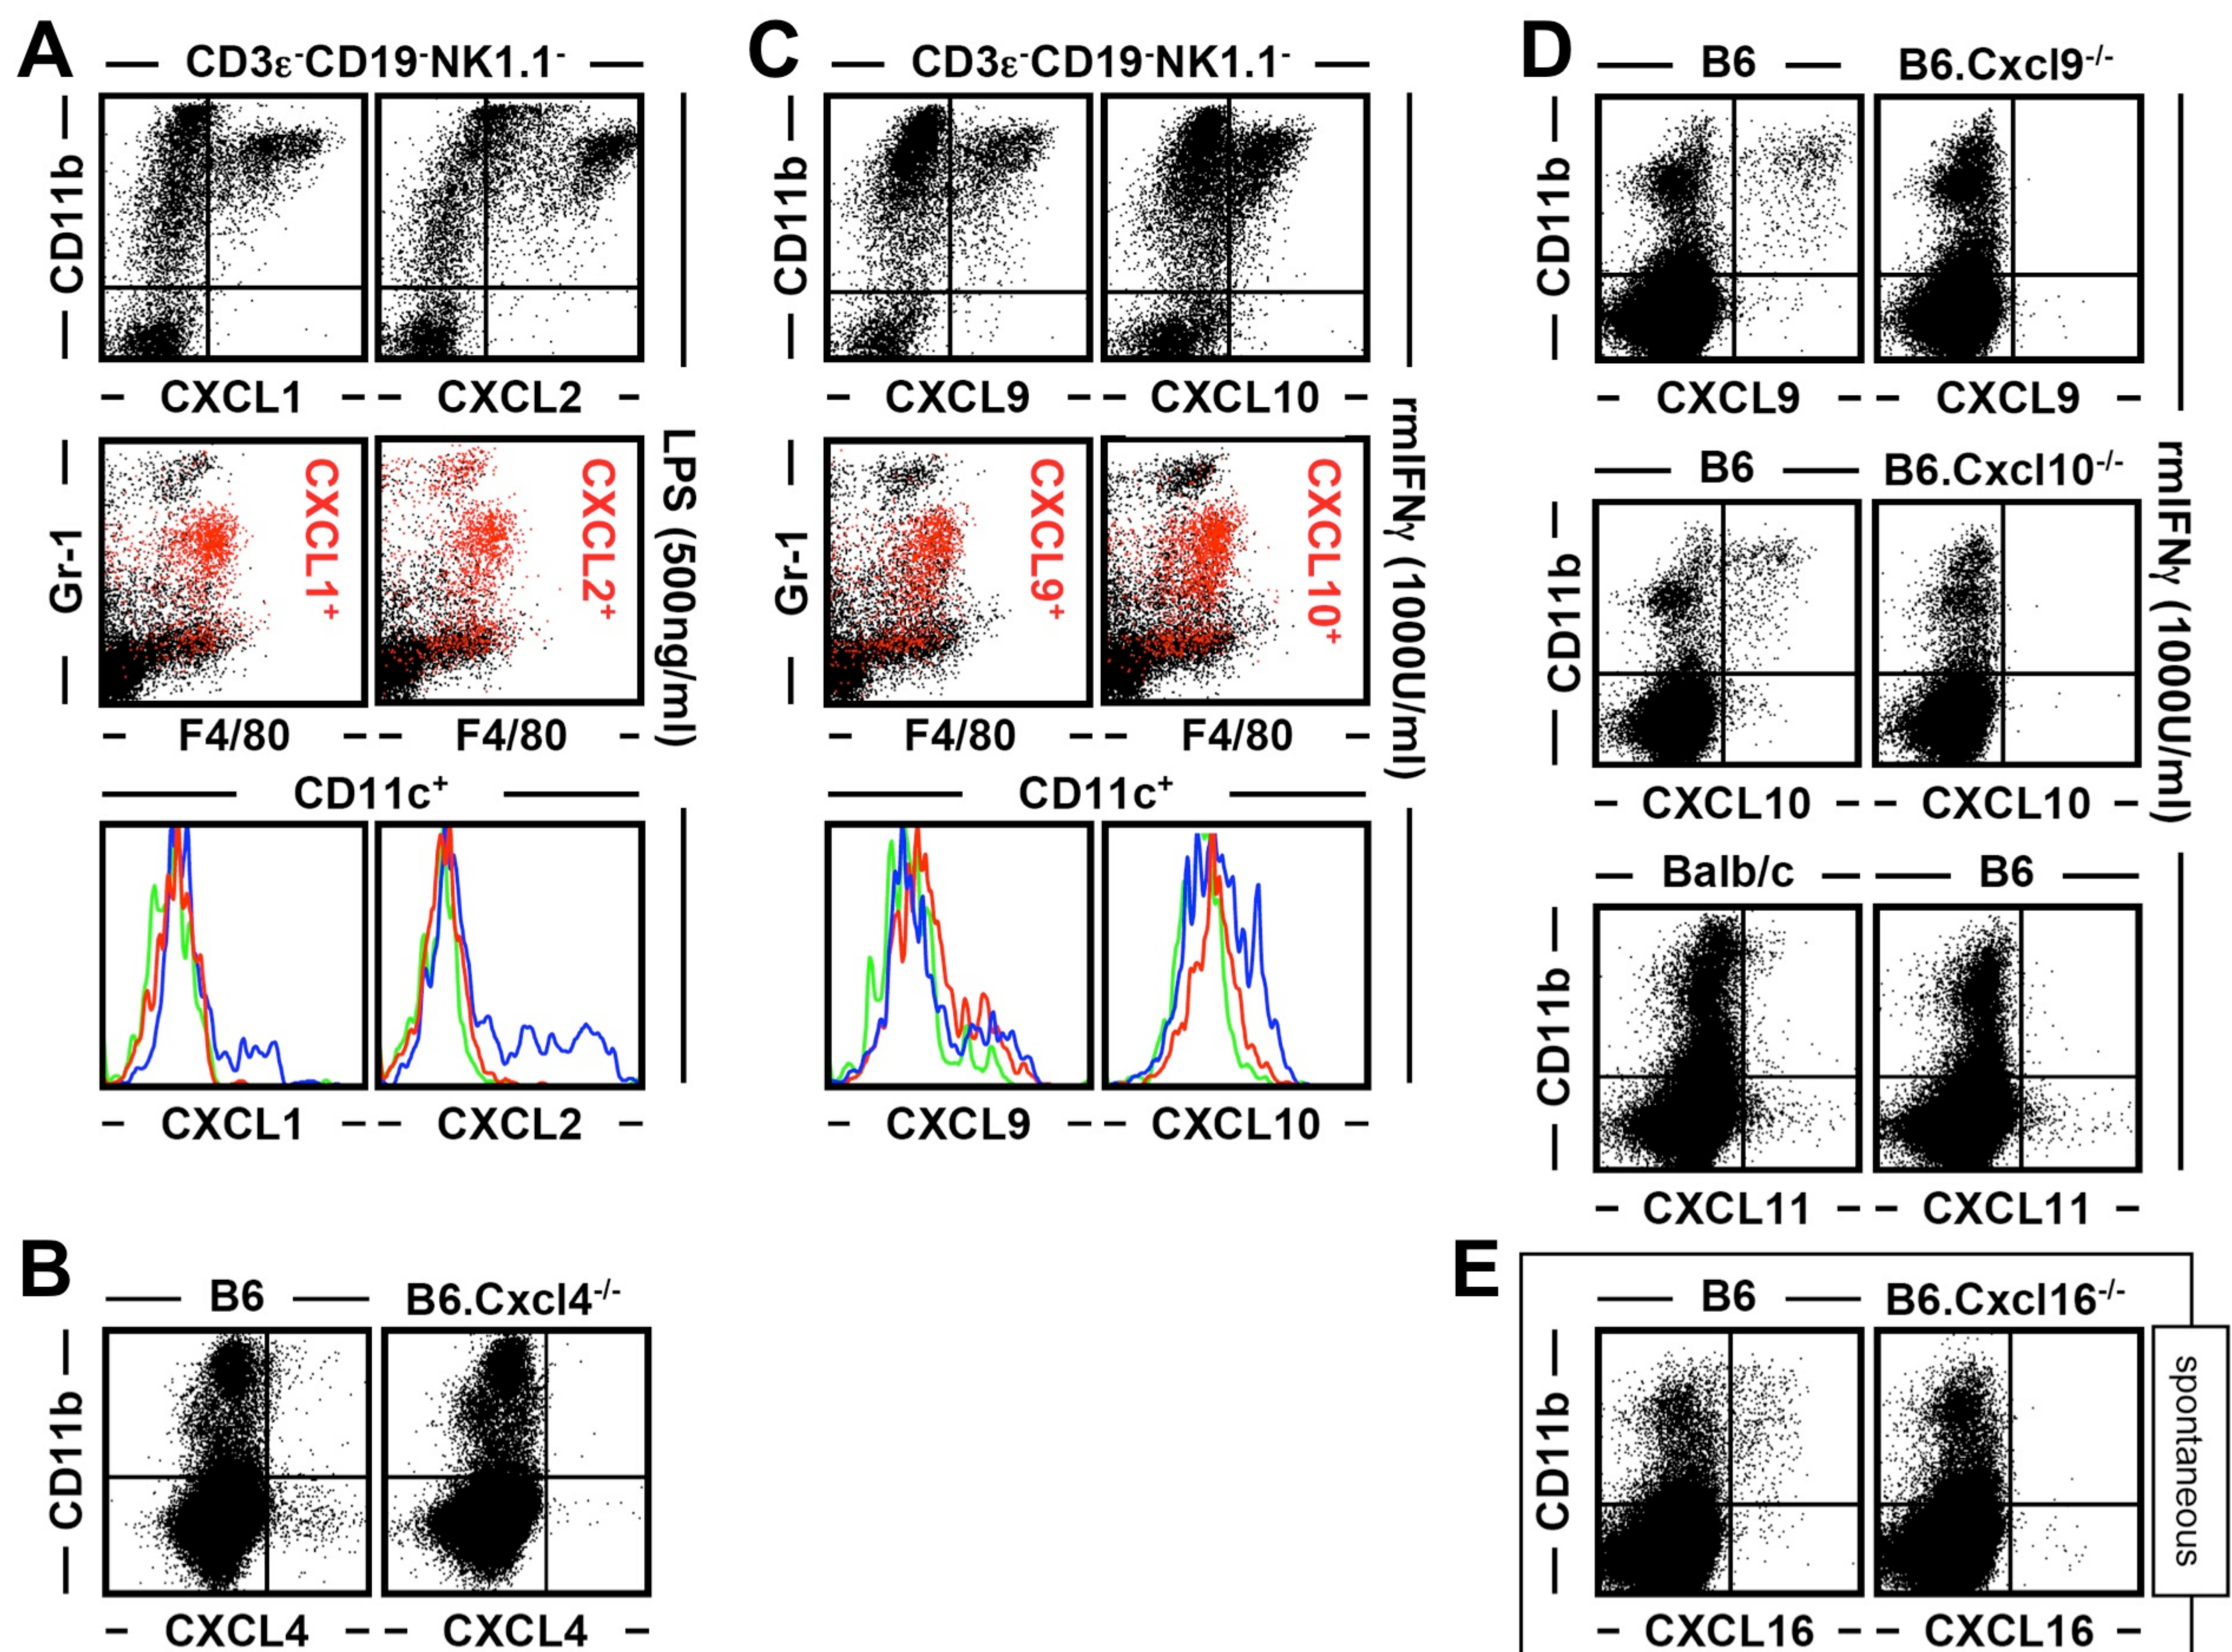

Figure S4

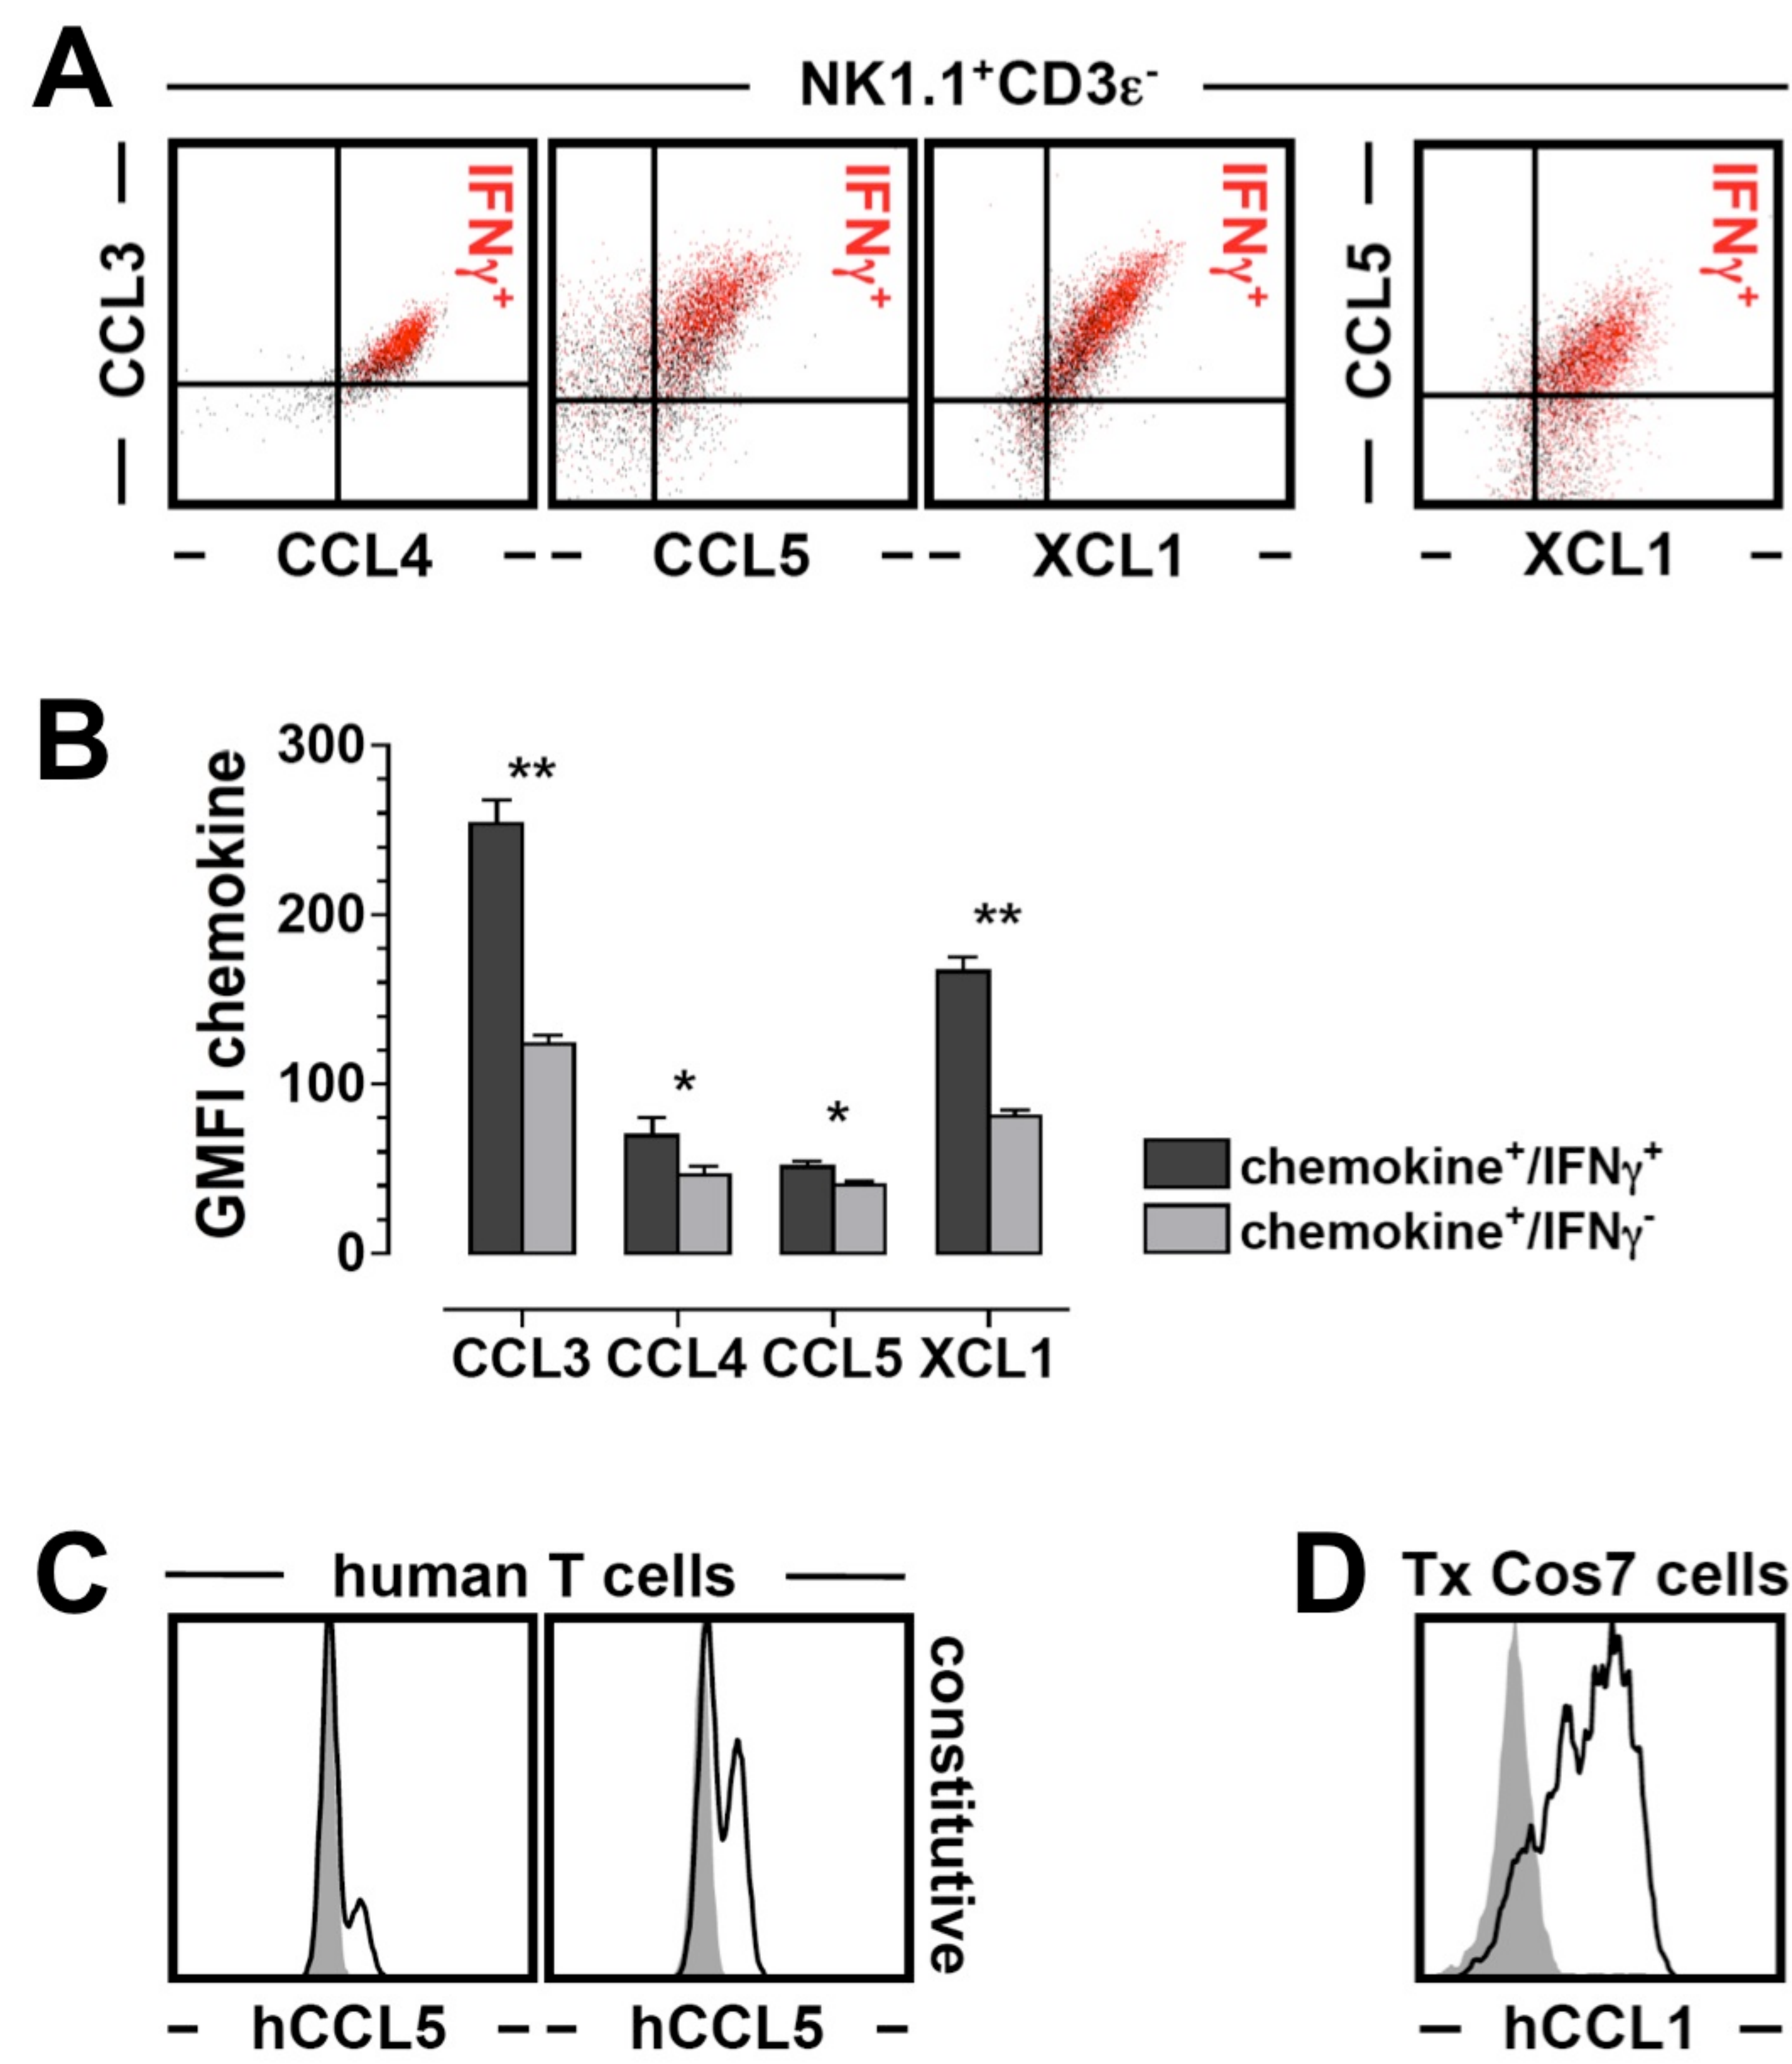

Figure S5

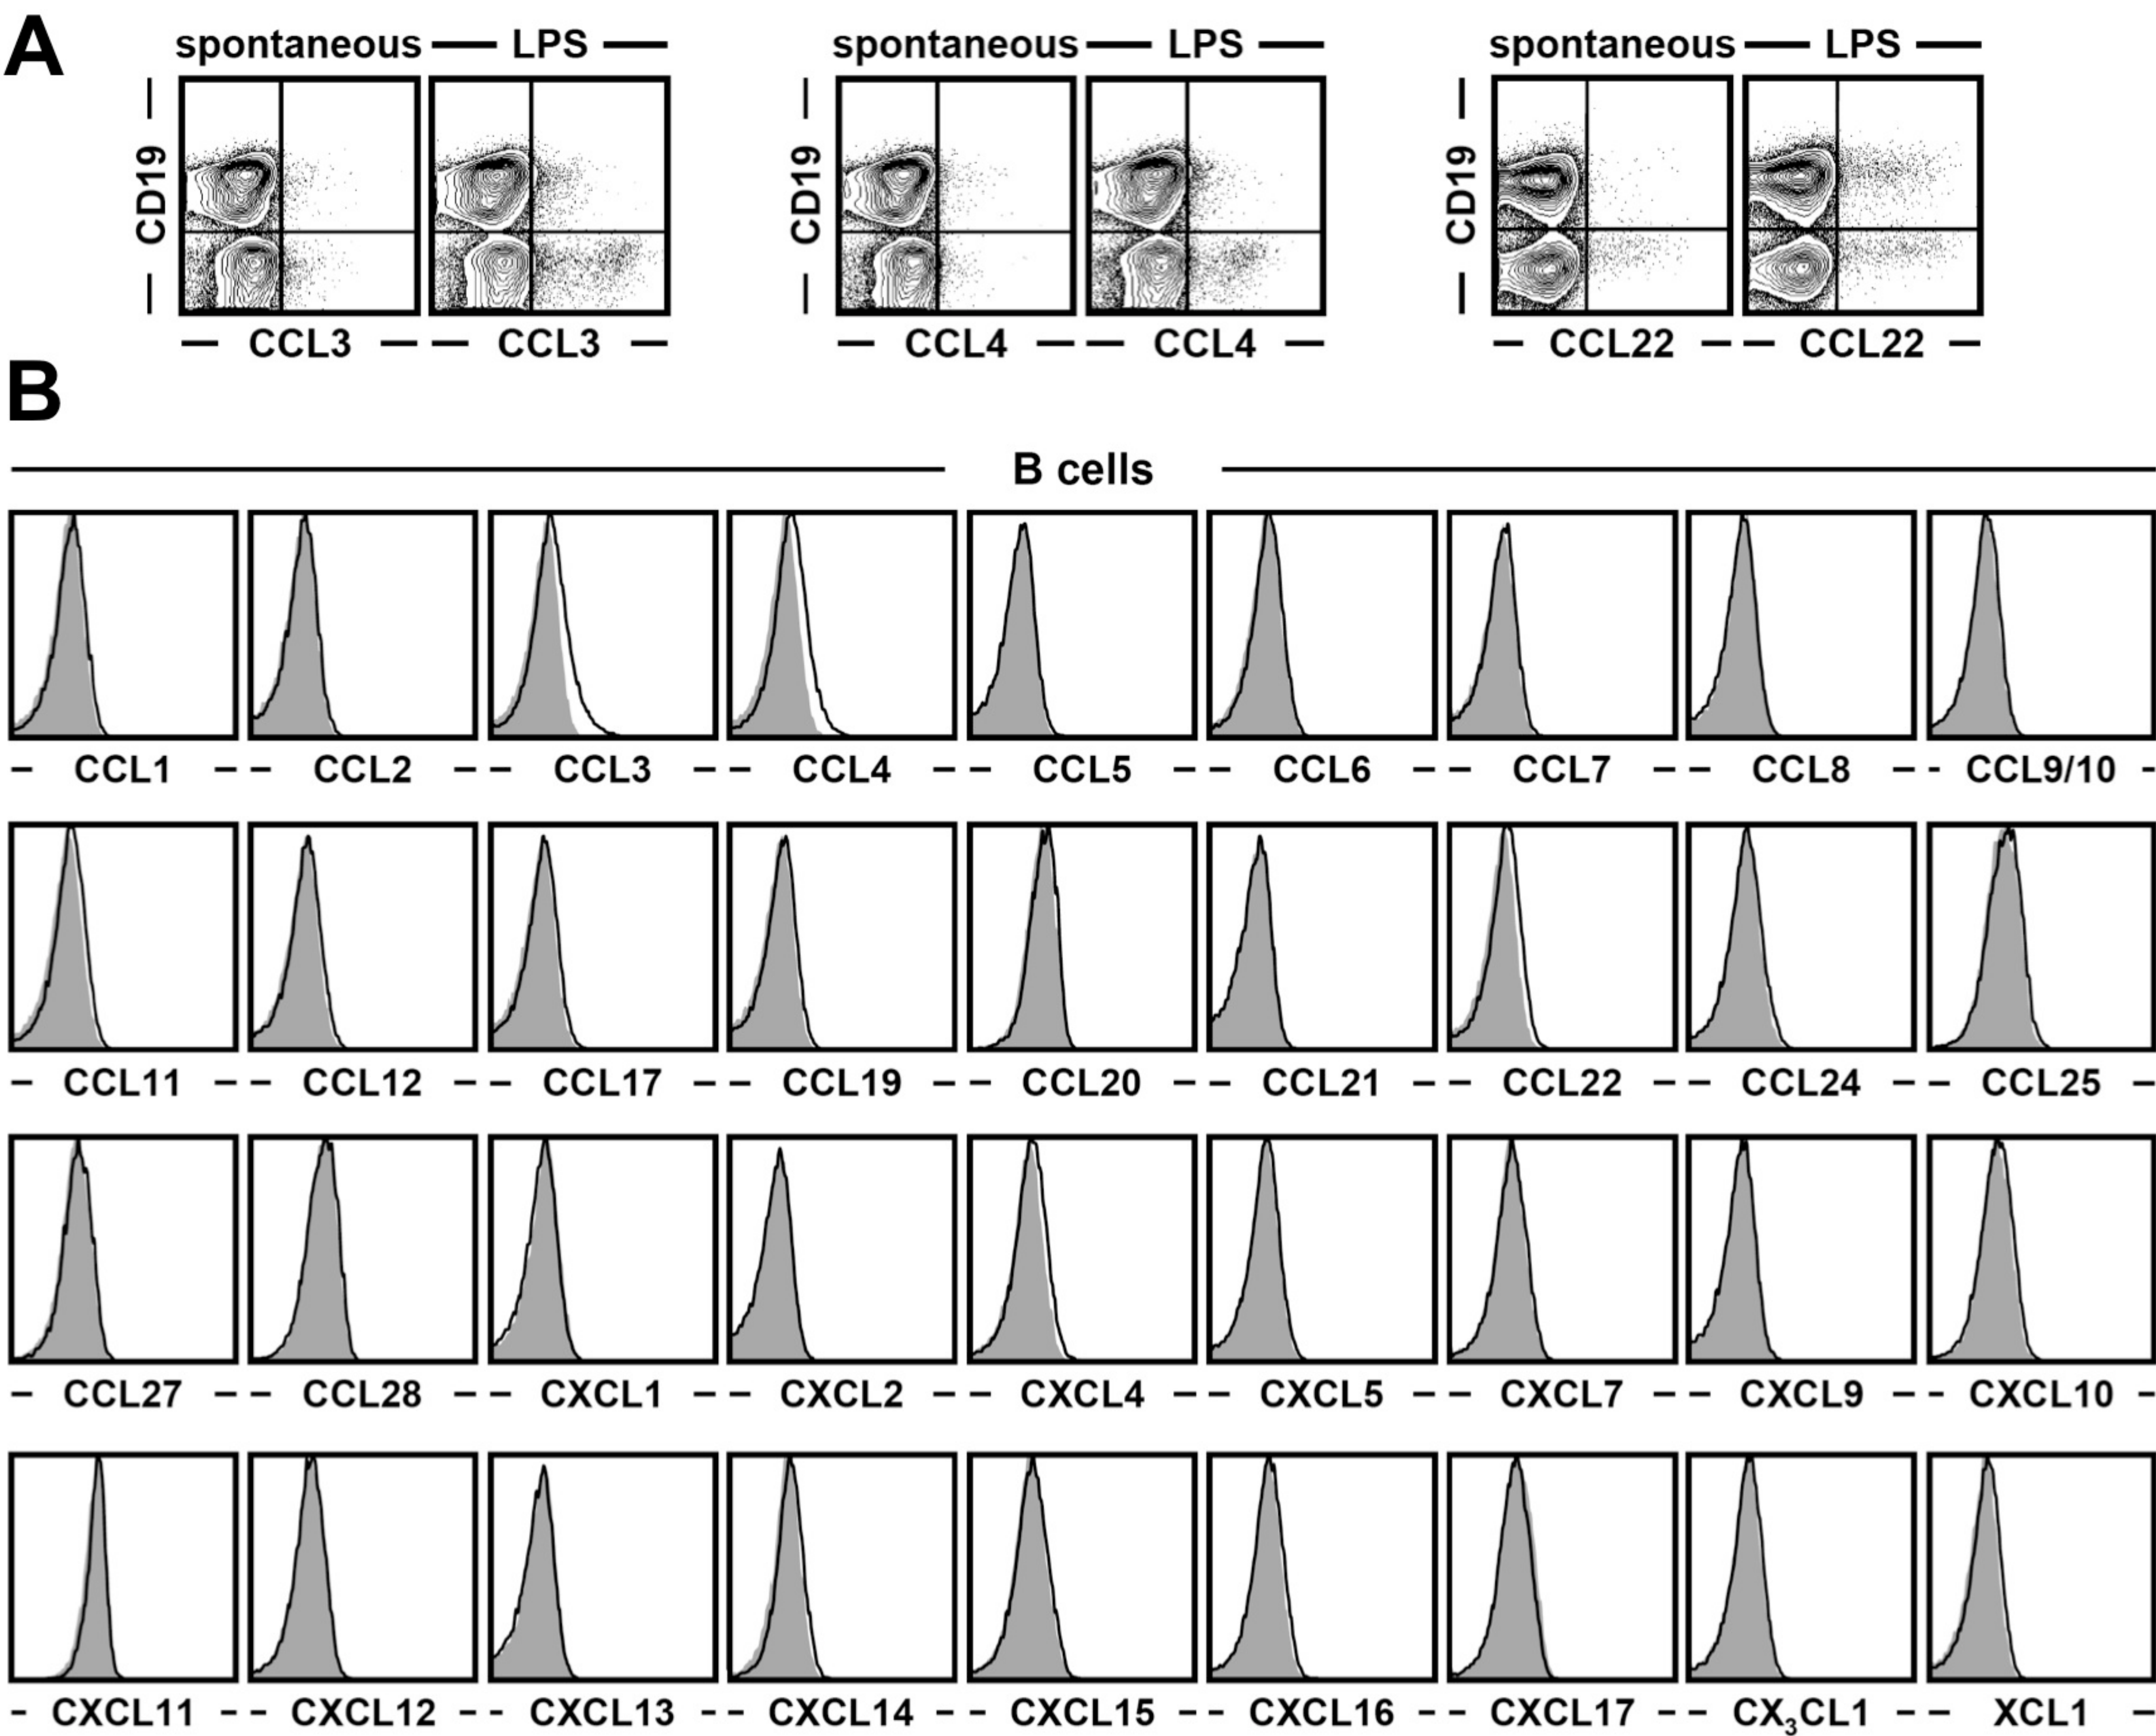

## SUPPLEMENTARY FIGURE LEGENDS

### Figure S1 Specificity controls for polyclonal chemokine antibodies.

HEK cells were transfected with 36 individual pIRES2-AcGFP1 chemokine vectors as shown in **Figure 1**, stained in parallel with 36 individual chemokine-specific pabs and analyzed by FC. To reduce proteasomal degradation, Cxcl14-transfected HEK cells were cultured in the presence of a protease inhibitor (10 $\mu$ M MG-132). (**A.1**) Reactivity of the CCL1-specific pab with HEK cells transfected with different chemokine vectors as indicated at the bottom of histograms. All histograms are gated on GFP<sup>+</sup> cells, the black solid histogram identifies the panel depicting cognate interactions ( $\alpha$ CCL1:CCL1) and the lack of specific staining in all other panels (gray histograms) demonstrates absence of crossreactivity of the  $\alpha$ CCL1 pab with other chemokines. (**A.2-E.4**) Experimental procedures and data display for individual chemokine-specific pabs as detailed above. Crossrecognition of non-cognate chemokines by a given pab are highlighted by gray backgrounds (panels A.2, A.3, A.5-7, B.1-3, B.8, C.5-C.8, D.1) and the data are summarized in **Table 1**. Panel D.7: staining of chemokine transfectants with the  $\alpha$ hCXCL14 mab clone 131120. A parallel evaluation of the  $\alpha$ hCXCL14 AF866 pab did not reveal apparent crossreactivities (not shown), but this assessment has to take into account the comparatively weak staining of Cxcl14 transfectants (**Figure 1**, insert). Based on our identification of a cross-reactivity cluster involving several gene products of the CXC-GRO group, we also included a comprehensive evaluation of CXCL3-reactivity:  $\alpha$ CXCL1/2/5 but no other chemokine-specific pabs or mabs exhibit partial crossreactivity with CXCL3 (not shown & **Table 1**). All crossreactive pabs were additionally tested on HEK chemokine transfectants prepared with separate plasmid stocks to rule out accidental cross-contamination (not shown).

### Figure S2 Antibody specificity controls & constitutive, spontaneous and/or induced expression patterns for selected CC chemokines.

(**A**) Splenocytes obtained from naïve B6 mice were cultured for 5h with BFA plus 500ng/ml LPS and subsequently stained for surface markers and intracellular chemokines. Dot plots are gated on CD3 $\epsilon$ <sup>+</sup> CD19<sup>+</sup>NK1.1<sup>+</sup> cells; histograms depict induced chemokine production by DC subsets within the CD3 $\epsilon$ <sup>+</sup> CD19<sup>+</sup>NK1.1<sup>+</sup> population (red: CD11c<sup>+</sup>DC, blue: CD11c<sup>+</sup>DC, green: pDC). Data not shown: LPS but not IFN $\gamma$  stimulation also increases CCL6 and CCL9/10 expression by CD11b<sup>+</sup> cell subsets (data are representative for 2-3 independent experiments analyzing 3 mice each). (**B**) Specificity controls for  $\alpha$ CCL2 pab stains as determined by spontaneous and LPS-induced CCL2 expression analysis of B6 vs. B6.Ccl2<sup>-/-</sup> mice. (**C**) Characterization of  $\alpha$ CCL2 clone 2H5 specificity with indicated HEK transfectants (left panel) and homoestatic CCL2 expression as revealed with the  $\alpha$ CCL2 mab. Gating strategies are indicated above the dot plots and the overlaid histograms in the right hand panel

demonstrate absence of spontaneous CCL2 production by DC subsets stratified according to CD11b/c expression levels as in panel A. **(D)** Characterization of  $\alpha$ CCL6 clone 262016 specificity with indicated HEK transfectants (left panel) and constitutive CCL6 production determined with the  $\alpha$ CCL6 mab; gating and data display as in panel C. **(E)** Specificity control for  $\alpha$ CCL7 pab stains. Spleen cells from B6 and B6.Ccl7<sup>-/-</sup> mice were cultured in the absence (“spontaneous”) or presence of LPS prior to surface and intracellular CCL7 stains; histograms are gated on CD11b<sup>+</sup> cells as Mo/M $\Phi$  constitute the major population of LPS-induced CCL7 producers (panel A). **(F)** Small intestinal epithelial cells (IEC) were prepared as detailed in Methods, stained and analyzed for constitutive CCL25 expression by FC (representative data for 3 independent analyses of individual mice).

**Figure S3 Antibody specificity controls & constitutive, spontaneous and/or induced expression patterns for selected CXC chemokines.**

**(A)** LPS-stimulated spleen cells were analyzed for induced CXCL1/2 expression; experimental details and data display as per legend to **Figure S2A** (representative data for 2-3 independent experiments analyzing 3 mice each). **(B)** Validation of  $\alpha$ CXCL4 pab specificity as determined in direct ex vivo stains of spleen cells from B6.Cxcl4<sup>-/-</sup> vs. wt littermates (“B6”). **(C)** B6 spleen cells were cultured for 5h in the presence of 1000U/ml recombinant mIFN $\gamma$  and BFA and analyzed for induced CXCL9/10 expression as detailed in legend to **Figure S2A** (independent experiments comprising groups of 2-3 mice were performed 4 times). **(D)** Specificity controls for  $\alpha$ CXCL9/10/11 pabs. Spleen cells from B6, B6.Cxcl9<sup>-/-</sup>, B6.Cxcl10<sup>-/-</sup> and Balb/c mice were stimulated with rmIFN $\gamma$  as above and analyzed for induced CXCL9/10/11 expression. In contrast to the robust CXCL9/10 production, rmIFN $\gamma$  induces only very modest levels of CXCL11 as evaluated in Balb/c mice (note that regular B6 mice, due to their lack of a functional Cxcl11 gene, are used here as a negative control). **(E)** Analysis of spontaneous CXCL16 synthesis (5h BFA culture of splenocytes) in B6 vs. B6.Cxcl16<sup>-/-</sup> mice confirms the specificity of the  $\alpha$ CXCL16 pab. Data not shown: LPS but not IFN $\gamma$  stimulation also increases CXCL16 expression by CD11b<sup>+</sup> cell subsets.

**Figure S4 Induced chemokine co-expression by murine NK cells & human chemokine control stains.**

**(A)** Following a 5h culture with PMA/ionomycin and BFA, B6 spleen cells were stained for surface and intracellular markers using pre-conjugated chemokine-specific pabs and/or the CCL3-specific mab clone 39624 in conjunction with  $\alpha$ IFN $\gamma$  as detailed in Methods. All plots are gated on NK1.1<sup>+</sup>CD3 $\epsilon$ <sup>-</sup> cells and IFN $\gamma$ -expressing NK subsets (~40-50% of NK cells) are indicated as red events. Data are compiled from 4 independent experiments evaluating 2-3 mice each. **(B)** Comparison of induced chemokine production (PMA/ionomycin) by IFN $\gamma$ <sup>+</sup> vs. IFN $\gamma$ <sup>-</sup> NK cell populations. The bar diagram displays the GMFI

(geometric mean of fluorescence intensity) of indicated chemokine stains in NK subsets demonstrating IFN $\gamma$  co-expression (black) and NK cells with detectable chemokine but no IFN $\gamma$  expression (gray) (n=3, one of 3 similar experiments). Asterisks indicate statistical significance as determined by paired t-tests. **(C)** Constitutive CCL5 expression by human T cells. Representative histograms are gated on CD3<sup>+</sup>CD56<sup>-</sup> PBMC from 2 healthy volunteers (gray: goat IgG, black: CCL5). **(D)** Cos7 cells were transfected with empty or human Ccl1 containing pIRES2-AcGFP1 vector and stained for expression of CCL1. Histograms are gated on GFP<sup>+</sup> Cos7 cells (gray: empty vector, black: Ccl1 vector; 24h Tx with BFA for final 5h).

**Figure S5 Spontaneous and induced chemokine production by murine B cells.**

**(A)** Spleen cells obtained from naïve B6 mice were cultured for 5h in the presence of BFA ("spontaneous") or 500ng/ml LPS and BFA and stained for CD19 and indicated chemokines. 5% probability contour plots are gated on "live" cells based on FSC/SSC properties; data are representative for at least 3 independent experiments. Similar results were obtained in stimulation cultures containing 5 $\mu$ g/ml LPS (not shown). **(B)** After 5h culture of spleen cells with BFA only (gray histograms) or B cell stimulation with  $\alpha$ IgM (10 $\mu$ g/ml) and  $\alpha$ CD40 (15 $\mu$ g/ml) abs plus BFA, cells were stained for surface markers and intracellular chemokines. CXCL11 analyses were conducted with spleen cells of Balb/c origin. All histograms are gated on CD19<sup>+</sup>CD3 $\epsilon$ <sup>-</sup> cells; data are representative for 2-3 independent experiments analyzing 3 mice each.

## SUPPLEMENTARY TABLES

|    | Gene    | Vendor | Clone/<br>IMAGE ID | Accession<br># | Insert 3' RE or primer (5' -> 3')                 | Insert 5' RE or primer (5' -> 3')                            | Target<br>3' RE | Target<br>5' RE |
|----|---------|--------|--------------------|----------------|---------------------------------------------------|--------------------------------------------------------------|-----------------|-----------------|
| 1  | Ccl1    | OBS    | 40129729           | BC120806       | <i>EcoRI</i>                                      | <i>EcoRI</i>                                                 | <i>EcoRI</i>    | <i>EcoRI</i>    |
| 2  | Ccl2    | OBS    | 40131170           | BC145867       | CCG CTC GAG CGG ACC ATG<br>CAG GTC CCT G          | CCG GAA TTC CGC TAG TTC<br>ACT GTC ACA CTG GTC               | <i>XhoI</i>     | <i>EcoRI</i>    |
| 3  | Ccl3    | OBS    | 40041119           | BC111443       | CCC CCT CGA GAT CAT GAA<br>GGT CTC CAC CAC        | CCC CGA ATT CTC AGG CAT<br>TCA GTT CCA G                     | <i>XhoI</i>     | <i>EcoRI</i>    |
| 4  | Ccl4    | OBS    | 8734006            | BC119257       | CCC CTC GAG ACC ATG AAG<br>CTC TGC GTG TCT GC     | CCC CCC GGG TCA GTT CAA<br>CTC CAA GTC ACT C                 | <i>XhoI</i>     | <i>EcoRI</i>    |
| 5  | Ccl5    | OBS    | 4925413            | BC033508       | CCG CTC GAG ACC ATG AAG<br>ATC TCT GCA G          | CCG GAA TTC TAG CTC ATC<br>TCC AAA TAG TTG ATG               | <i>XhoI</i>     | <i>EcoRI</i>    |
| 6  | Ccl6    | OBS    | 3492808            | BC002073       | <i>EcoRI</i>                                      | <i>DraI</i>                                                  | <i>EcoRI</i>    | <i>SmaI</i>     |
| 7  | Ccl7    | OBS    | 30276350           | BC061126       | <i>Sall</i>                                       | <i>RsaI</i>                                                  | <i>XhoI</i>     | <i>SmaI</i>     |
| 8  | Ccl8    | OBS    | 40126422           | BC117101       | GTG CTC GAG AAC ATG TAC<br>GCA GTG C              | CGG AAT TCT CAA GGC TGC<br>AGA ATT TGA GAC TTC               | <i>XhoI</i>     | <i>EcoRI</i>    |
| 9  | Ccl9/10 | OBS    | 40131265           | BC145962       | <i>EcoRI</i>                                      | <i>EcoRI</i>                                                 | <i>EcoRI</i>    | <i>EcoRI</i>    |
| 10 | Ccl11   | OBS    | 1527856            | BC027521       | <i>EcoRI</i>                                      | <i>EcoRV</i>                                                 | <i>EcoRI</i>    | <i>SmaI</i>     |
| 11 | Ccl12   | OBS    | 1548072            | BC027520       | <i>XhoI</i>                                       | <i>EcoRV</i>                                                 | <i>XhoI</i>     | <i>SmaI</i>     |
| 12 | Ccl17   | ATCC   | 3328278            | BC028505       | CCG AGA TCT CCC ATG AAG<br>ACC TTC ACC            | GCG AAT TCG GGA AGG TCA<br>TGG CCT TGG G                     | <i>BglII</i>    | <i>EcoRI</i>    |
| 13 | Ccl19   | OBS    | 1349213            | BC051472       | GTG CTC GAG GCC ATG GCC<br>CCC CGT G              | CGG AAT TCT CAA AC ACA<br>GGG CTC CTT CTG GTG C              | <i>XhoI</i>     | <i>EcoRI</i>    |
| 14 | Ccl20   | OBS    | 1380543            | BC028504       | <i>EcoRI</i>                                      | <i>PvuII</i>                                                 | <i>EcoRI</i>    | <i>SmaI</i>     |
| 15 | Ccl21b  | OBS    | 3372243            | BC038120       | GTG CTC GAG ACC ATG GCT<br>CAG ATG ACT CTG        | GGG AAT TCT ATC CTC TTG<br>AGG GCT GTG TCT                   | <i>XhoI</i>     | <i>EcoRI</i>    |
| 16 | Ccl22   | OBS    | 4192393            | BC012658       | <i>EcoRI</i>                                      | <i>HpaI</i>                                                  | <i>EcoRI</i>    | <i>SmaI</i>     |
| 17 | Ccl24   | OBS    | 3472002            | BC065389       | <i>EcoRI</i>                                      | <i>XmnI</i>                                                  | <i>EcoRI</i>    | <i>SmaI</i>     |
| 18 | Ccl25   | OBS    | 40126352           | BC117033       | <i>BglII</i>                                      | <i>EcoRI</i>                                                 | <i>BglII</i>    | <i>EcoRI</i>    |
| 20 | Ccl27   | OBS    | 3471454            | BC028511       | GTG CTC GAG ACC ATG ATG<br>GAG GGG CTC            | CCG GAA TTC CGG TTA GTT<br>TTG CTG TTG GGG G                 | <i>XhoI</i>     | <i>EcoRI</i>    |
| 22 | Ccl28   | OBS    | 4240191            | BC055864       | <i>EcoRI</i>                                      | <i>PstI</i>                                                  | <i>EcoRI</i>    | <i>PstI</i>     |
| 23 | Cxcl1   | OBS    | 40130779           | BC132502       | <i>EcoRI</i>                                      | <i>EcoRI</i>                                                 | <i>EcoRI</i>    | <i>EcoRI</i>    |
| 24 | Cxcl2   | OBS    | 40055368           | BC119511       | <i>SacI</i>                                       | <i>XmaI</i>                                                  | <i>SacI</i>     | <i>XmaI</i>     |
| 25 | Cxcl3   | OBS    | 40126333           | BC117014       | <i>EcoRI</i>                                      | <i>EcoRI</i>                                                 | <i>EcoRI</i>    | <i>EcoRI</i>    |
| 26 | Cxcl4   | OBS    | 30280161           | BC061111       | <i>Sall</i>                                       | <i>PstI</i>                                                  | <i>XhoI</i>     | <i>PstI</i>     |
| 27 | Cxcl5   | OBS    | 4976854            | BC024392       | <i>EcoRI</i>                                      | <i>EcoRI</i>                                                 | <i>EcoRI</i>    | <i>EcoRI</i>    |
| 28 | Cxcl7   | OBS    | 40053104           | BC127043       | <i>XhoI</i>                                       | <i>BamHI</i>                                                 | <i>XhoI</i>     | <i>BamHI</i>    |
| 29 | Cxcl9   | OBS    | 3257716            | BC003343       | <i>EcoRI</i>                                      | <i>RsaI</i>                                                  | <i>EcoRI</i>    | <i>SmaI</i>     |
| 30 | Cxcl10  | OBS    | 1446589            | BC030067       | CCG CTC GAG CGG ACC ATG<br>AAC CCA AGT GCT G      | CCG GAA TTC CGG TTA AGG<br>AGC CCT TTT AGA CC                | <i>XhoI</i>     | <i>EcoRI</i>    |
| 31 | Cxcl11  | OBS    | 5035983            | BC025903       | GTG CTC GAG ACC ATG AAC<br>AGG AAG GTC AC         | GCC GGA ATT CTC ACA TGT<br>TTT GAC GCC                       | <i>XhoI</i>     | <i>EcoRI</i>    |
| 32 | Cxcl12  | OBS    | 6406409            | BC046827       | CCG CTC GAG ACC ATG GAC<br>GCC AAG GTC            | CGC TTC TTT TTT CCT ATC<br>TTT TCT TTT TTC CCC AC            | <i>XhoI</i>     | <sup>3)</sup>   |
|    | Cxcl12  | OBS    | 6406409            | BC046827       | GTG GGG AAA AAA GAA AAG<br>ATA GGA AAA AAG AAG CG | GGA ATT CCC TAG TTT TTC<br>CTT TTC TGG GC                    | <sup>3)</sup>   | <i>EcoRI</i>    |
| 33 | Cxcl13  | OBS    | 4217539            | BC012965       | CCG CTC GAG CCG ACC ATG<br>AGG CTC AGC ACA GC     | CCG GAA TTC CGG TCA GGC<br>AGC TCT TCT CTT AC                | <i>XhoI</i>     | <i>EcoRI</i>    |
| 34 | Cxcl14  | OBS    | 9056321            | BC147274       | CCC CTC GAG ACC ATG AGG<br>CTC CTG GCG            | GGG AAT TCT TAA AGT TCG<br>TCC TTT TCT TCG TAG ACC<br>CTG CG | <i>XhoI</i>     | <i>EcoRI</i>    |
| 35 | Cxcl15  | OBS    | 30298837           | BC061138       | CCG CTC GAG CGG ATC CAG<br>ACC AGA GTC AGG C      | CCC CCC GGG TTA AAG TTC<br>GTC CTT GGC ATC ACT GCC<br>TGT    | <i>XhoI</i>     | <i>EcoRI</i>    |

|    |                            |     |         |          |                                                  |                                                    |             |              |
|----|----------------------------|-----|---------|----------|--------------------------------------------------|----------------------------------------------------|-------------|--------------|
| 36 | Cxcl16                     | OBS | 3988542 | BC019961 | CCG CTC GAG ACC ATG AGG<br>CGG GGC TTT G         | GGG AAT TCG GCG CTA GGG<br>TCT TGG TTC             | <i>XhoI</i> | <i>EcoRI</i> |
| 37 | Cxcl17                     | OBS | 1547987 | BE197231 | CCC CTC GAG ACC ATG AAG<br>CTT CTA GCC TCT CC    | CCC GAA TTC CTA TAA GGG<br>CAG CGC AAA GCT         | <i>XhoI</i> | <i>EcoRI</i> |
| 39 | Cx3cl1                     | OBS | 6490082 | BC054838 | CCG CTC GAG CGG CCA<br>TGG CTC CCT CG            | CGG AAT TCC GTC ACA CTG<br>GCA CCA GGA CG          | <i>XhoI</i> | <i>EcoRI</i> |
| 38 | Xcl1                       | OBS | 3974601 | BC062249 | CCG CTC GAG CCA TGA GAC<br>TTC TCC TCC           | CGG GAA TTC CTT ACC CAG<br>TCA GGG TTA TCG C       | <i>XhoI</i> | <i>EcoRI</i> |
| 40 | mIL15 <sup>1)</sup>        |     |         |          | GCT GCT CGA GCT CGG CCA<br>CCA TGT ACA GCA TG    | CTG CAG AAT TCC GAG TCA<br>GGA CGT GTT GAT G       | <i>XhoI</i> | <i>EcoRI</i> |
| 41 | pIRES2AcGFP1 <sup>2)</sup> |     |         |          | AGC AGA GCT GGT TTA GTG<br>AAC CGT <sup>4)</sup> | TAT TCC AAG CGG CTT CGG<br>CCA GTA A <sup>4)</sup> |             |              |

**Table S1 Overview of chemokine subcloning reagents.**

Original clones were obtained from OpenBiosystems (OBS) and American Tissue Culture Consortium (ATCC). <sup>1)</sup>Gift from Dr. T. Sosinowski, <sup>2)</sup>Clontech, <sup>3)</sup>primers for PCR-driven overlap extension (Heckman *et al.*, 2007, PMID:17446874) to correct frame-shift, <sup>4)</sup>sequencing primers to verify proper insert sequence and orientation.

| Antigen                            | Other Name(s)       | Antibody clone   | Ab species & isotype                     | Format                                  | Source                       |
|------------------------------------|---------------------|------------------|------------------------------------------|-----------------------------------------|------------------------------|
| <b>Surface &amp; intracellular</b> |                     |                  |                                          |                                         |                              |
| CD3 $\epsilon$                     |                     | 145-2C11<br>17A2 | hamster<br>rlgG <sub>2b</sub>            | FITC/PE/PerCP<br>eFluor450              | BDBiosciences/ebioscience    |
| CD4                                |                     | GK1.5<br>RM4-5   | rlgG <sub>2b</sub><br>rlgG <sub>2a</sub> | FITC/PE/APC<br>FITC/PE/PerCP            | ebioscience<br>BDBiosciences |
| CD8 $\alpha$                       |                     | 53-6.7           | rlgG <sub>2a</sub>                       | FITC/PE/PerCP/APC/<br>PE-Cy7/APC-Cy7/PB | BDBiosciences/ebioscience    |
| CD11b                              | integrin $\alpha$ M | M1/70            | rlgG <sub>2b</sub>                       | FITC/PE/APC/PerCP-Cy5.5                 | BDBiosciences/ebioscience    |
| CD11c                              | integrin $\alpha$ X | HL3              | hamster                                  | FITC/PE/APC                             | BDBiosciences                |
| CD16/32                            | "Fc block"          | 2.4G2            | rlgG <sub>2b</sub>                       | purified                                | BDBiosciences                |
| CD19                               |                     | 1D3              | rlgG <sub>2a</sub>                       | PE/PerCP-Cy5.5                          | ebioscience                  |
| CD45                               |                     | 30-F11           | rlgG <sub>2b</sub>                       | FITC/PerCP                              | BDBiosciences                |
| CD45.2                             |                     | 104              | mlgG <sub>2a</sub>                       | FITC                                    | BDBiosciences                |
| CD45R                              | B220                | RA3-6B2          | rlgG <sub>2a</sub>                       | FITC/PE/APC                             | ebioscience                  |
| CD49b                              | integrin $\alpha$ 2 | DX5              | rlgM                                     | FITC/PE                                 | ebioscience                  |
| CD161c                             | NK1.1               | PK136            | mlgG <sub>2a</sub>                       | FITC/PE/PerCP-Cy5.5                     | BDBiosciences/ebioscience    |
| CD197                              | CCR7                | 4B12             | rlgG <sub>2a</sub>                       | PE                                      | Biolegend                    |
| Gr-1                               | Ly6C/G              | RB6-8C5          | rlgG <sub>2b</sub>                       | FITC/Alx488/PE                          | ebioscience                  |
| F4/80                              |                     | BM8              | rlgG <sub>2a</sub>                       | PE                                      | Invitrogen/Caltag            |
| IFN $\gamma$                       |                     | XMG1.2           | rlgG <sub>1</sub>                        | PE/APC/PE-Cy7                           | BDBiosciences/ebioscience    |
| hCD3                               |                     | SK7              | mlgG <sub>1</sub>                        | PerCP                                   | BDBiosciences                |
| hCD56                              |                     | B159             | mlgG <sub>1</sub>                        | PE/APC                                  | BDBiosciences                |
| hIFN $\gamma$                      |                     | 4S.B3            | mlgG <sub>1</sub>                        | Pacific Blue                            | ebioscience                  |
| <b>Isotope controls</b>            |                     |                  |                                          |                                         |                              |
| unknown                            |                     | R35-95           | rlgG <sub>2a</sub>                       | FITC/PE                                 | BDBiosciences                |
| unknown                            |                     | A95-1            | rlgG <sub>2b</sub>                       | FITC/PE                                 | BDBiosciences                |
| TNP                                |                     | A19-3            | hamster                                  | PE                                      | BDBiosciences                |
| unknown                            |                     | G235-2356        | hamster                                  | PE                                      | BDBiosciences                |
| KLH                                |                     | 11711            | mlgG <sub>1</sub>                        | PE                                      | RnD Systems                  |
| unknown                            |                     |                  | mlgG <sub>1</sub>                        | PE                                      | Invitrogen/Caltag            |
| dansyl                             |                     | 27-35            | mlgG <sub>2b</sub>                       | PE/APC                                  | BDBiosciences                |
| unknown                            |                     | B10              | mlgG <sub>3</sub>                        | PE                                      | Southern Biotech             |

**Table S2 Antibodies for use in FC.**

The table lists all abs used for FC other than chemokine-specific abs; for the latter, please see **Table 1** (murine chemokine abs) and Methods (human chemokine abs).
